# Supplementary material for: Ortho -ester-substituted diaryliodonium salts enabled regioselective arylocyclization of naphthols toward 3,4-benzocoumarins
Source: publisher site journal article supplement (doi:10.3762/bjoc.20.76), 2024-04-18

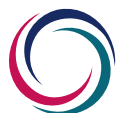

## Supporting Information

for

### ***Ortho*-ester-substituted diaryliodonium salts enabled regioselective arylocyclization of naphthols toward 3,4-benzocoumarins**

Ke Jiang, Cheng Pan, Limin Wang, Hao-Yang Wang and Jianwei Han

*Beilstein J. Org. Chem.* **2024**, *20*, 841–851. [doi:10.3762/bjoc.20.76](https://doi.org/10.3762/bjoc.20.76)

**Experimental procedures, LC–MS spectra and characterization data of all products, copies of  $^1\text{H}$ ,  $^{13}\text{C}$ ,  $^{19}\text{F}$  NMR spectra of all compounds**

## Table of Contents

|                                                                                                      |     |
|------------------------------------------------------------------------------------------------------|-----|
| Part 1. General information .....                                                                    | S2  |
| Part 2. Synthesis and characterization of <i>ortho</i> -ester-substituted diaryliodonium salts ..... | S3  |
| Part 3. Table of reaction condition optimization .....                                               | S8  |
| Part 4. Synthesis and characterization of 3,4-benzocoumarins .....                                   | S9  |
| Part 5. Mechanism study .....                                                                        | S25 |
| Part 6. References .....                                                                             | S26 |
| Part 7. $^1\text{H}$ , $^{13}\text{C}$ , and $^{19}\text{F}$ NMR spectra of products .....           | S27 |

## Part 1. General information

### a. Methods:

**NMR spectrum:**  $^1\text{H}$ ,  $^{13}\text{C}$ , and  $^{19}\text{F}$  NMR spectra were recorded in  $\text{CDCl}_3$  or  $\text{DMSO}-d_6$  (with tetramethylsilane as an internal standard) on a Bruker AVANCE 400 spectrometer at ambient temperature, operating at 400 MHz, 101 MHz, and 376 MHz, respectively. Data were reported as follows: Chemical shifts ( $\delta$ ) are reported in ppm, and coupling constants (J) are in Hertz (Hz). The following abbreviations were used to explain the multiplicities: s = singlet, d = doublet, t = triplet, q = quartet, m = multiplet, br = broad.

**Mass spectroscopy:** Mass spectra were in general recorded on a Waters LCT Premier XE spectrometer or EI Mass spectra were measured on HP HP5989A, Agilent HP5873 or Waters Micromass GCT mass spectrometer. ESI-MS analyses were performed in positive ionization mode on an Agilent 1100-MSD or Bruker Daltonics FTMS-7 mass spectrometer.

**Chromatography:** Column chromatography was performed with silica gel (200-300 mesh ASTM).

### b. Materials:

All solvents were purchased from Adamas-beta and dried and/or distilled by standard methods. All reagents were purchased from commercial sources (Adamas-beta; Sinopharma reagents; TCI; Acros) and used without further purification. Reactions were monitored by TLC (detection with UV light). The preparation of all other materials is described in detail below.

## Part 2. Synthesis and characterization of *ortho*-ester-substituted diaryliodonium salts

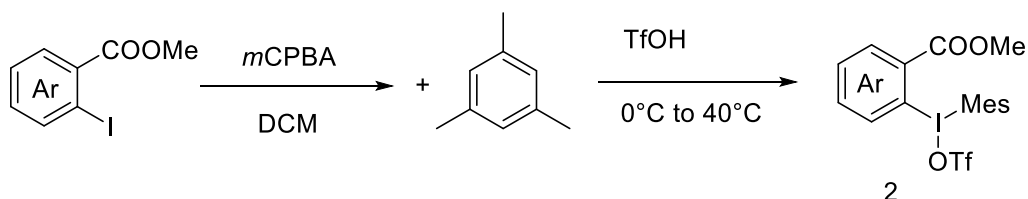

**General procedure 1:** To a solution of methyl 2-iodobenzoate (10 mmol) in  $\text{CH}_2\text{Cl}_2$  (40 mL) was slowly added *m*CPBA (2.5 g, 11 mmol) at room temperature. After stirring for 5 minutes, mesitylene (2.0 mL, 12 mmol) was added. Then trifluoromethanesulfonic acid (1.2 mL, 15 mmol) was added dropwise over 2 minutes at 0 °C and the solution was stirred at 4 0°C for 2–3 hours until TLC indicated that the methyl 2-iodobenzoate was completely consumed. The solvent was removed in vacuo and  $\text{Et}_2\text{O}$  (50 mL) was added in the mixture. The mixture was stirred vigorously until the solid precipitated. The solids were washed with  $\text{Et}_2\text{O}$  ( $2 \times 10$  mL) and filtrated under reduced pressure to give the *ortho*-ester-substituted diaryliodonium Salts (**2a–j**) in a pure form [1].

### Methyl 2-(mesityl(((trifluoromethyl)sulfonyl)oxy)- $\lambda^3$ -iodaneyl)benzoate (**2a**)

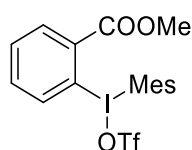

Prepared according to the **General procedure 1** on 10 mmol scale. The desired product of *ortho*-ester-substituted diaryliodonium salts (**2a**) was obtained as white solid (4.24 g, 81%).

**$^1\text{H}$  NMR (400 MHz,  $\text{DMSO}-d_6$ )**  $\delta$  8.34 (d,  $J = 7.3$  Hz, 1H), 7.83 – 7.73 (m, 2H), 7.42 (s, 2H), 6.90 (d,  $J = 7.7$  Hz, 1H), 4.07 (s, 3H), 2.53 (s, 6H), 2.43 (s, 3H).

Analytical data are consistent with the reported ones [2].

### Ethyl 2-(mesityl(((trifluoromethyl)sulfonyl)oxy)- $\lambda^3$ -iodaneyl)benzoate (**2b**)

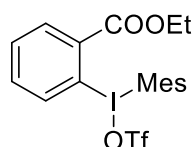

Prepared according to the **General procedure 1** on 1 mmol scale. The desired product of *ortho*-ester-substituted diaryliodonium salts (**2b**) was obtained as white solid (462 mg, 85%).

**M.P.:** 186–189 °C.

**$^1\text{H}$  NMR (400 MHz,  $\text{DMSO}-d_6$ )**  $\delta$  8.33 (dd,  $J = 7.5, 1.8$  Hz, 1H), 7.80 (d,  $J = 1.0$  Hz, 2H), 7.41 (s, 2H), 6.87 (dd,  $J = 8.0, 0.9$  Hz, 1H), 4.52 (d,  $J = 7.1$  Hz, 2H), 3.36 (water, the same as below), 2.51 (s, 6H), 2.42 (s, 3H), 1.42 (t,  $J = 7.1$  Hz, 3H).

**$^{13}\text{C}$  NMR (101 MHz,  $\text{DMSO}-d_6$ )**  $\delta$  167.44 (s), 144.59 (s), 143.30 (s), 137.37 (s), 132.97 (s), 131.43 (s), 130.17 (s), 128.57 (s), 127.65 (s), 120.72 (q,  $J_{\text{C-F}} = 323.2$  Hz), 117.87 (s), 113.65 (s), 63.82 (s), 26.13 (s), 20.83 (s), 13.95 (s).



**<sup>19</sup>F NMR (376 MHz, DMSO-*d*<sub>6</sub>)** δ -77.77.

The peak at 3.36 ppm is the water peak from DMSO-*d*<sub>6</sub>, which cannot be removed, and is similar to the following

**HRMS m/z (ESI-TOF):** calculated for C<sub>18</sub>H<sub>20</sub>O<sub>2</sub>I<sup>+</sup> [M-OTf]<sup>+</sup> 395.0508, found 395.0486.

**Methyl 2-(mesityl(((trifluoromethyl)sulfonyl)oxy)- λ<sup>3</sup>-iodaneyl)-6-methylbenzoate (2c)**

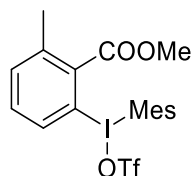

Prepared according to the *General procedure 1* on 1 mmol scale. The desired product of *ortho*-ester-substituted diaryliodonium salts (**2c**) was obtained as white solid (450 mg, 80%).

**M.P.:** 175-178 °C.

**<sup>1</sup>H NMR (400 MHz, DMSO-*d*<sub>6</sub>)** δ 7.65 (d, *J* = 7.5 Hz, 1H), 7.56 (t, *J* = 7.9 Hz, 1H), 7.37 (s, 2H), 6.92 (d, *J* = 8.0 Hz, 1H), 4.04 (s, 3H), 2.64 (s, 3H), 2.51 (s, 6H), 2.40 (s, 3H).

**<sup>13</sup>C NMR (101 MHz, DMSO-*d*<sub>6</sub>)** δ 169.41, 144.37, 144.35, 143.05, 135.65, 135.03, 130.07, 127.70, 127.63, 120.69(q, *J*<sub>C-F</sub> = 323.2Hz), 119.38, 115.59, 54.32, 39.52, 26.04, 22.90, 20.75.

**<sup>19</sup>F NMR (376 MHz, DMSO-*d*<sub>6</sub>)** δ -77.77.

**HRMS m/z (ESI-TOF):** calculated for C<sub>18</sub>H<sub>20</sub>O<sub>2</sub>I<sup>+</sup> [M-OTf]<sup>+</sup> 395.0508, found 395.0489.

**Methyl 4-chloro-2-(mesityl(((trifluoromethyl)sulfonyl)oxy)- λ<sup>3</sup>-iodaneyl)benzoate (2d)**

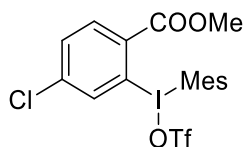

Prepared according to the *General procedure 1* on 1 mmol scale. The desired product of *ortho*-ester-substituted diaryliodonium salts (**2d**) was obtained as white solid (423 mg, 75%).

**M.P.:** 157-160 °C.

**<sup>1</sup>H NMR (400 MHz, DMSO-*d*<sub>6</sub>)** δ 8.29 (d, *J* = 8.4 Hz, 1H), 7.90 (dd, *J* = 8.3, 1.4 Hz, 1H), 7.43 (s, 2H), 6.64 (d, *J* = 1.5 Hz, 1H), 4.06 (s, 3H), 2.54 (s, 6H), 2.44 (s, 3H).

**<sup>13</sup>C NMR (101 MHz, DMSO-*d*<sub>6</sub>)** δ 167.34, 144.96, 143.32, 141.45, 133.88, 131.58, 130.28, 127.91, 126.88, 120.69(q, *J*<sub>C-F</sub> = 323.2Hz), 118.34, 115.40, 54.63, 39.52, 26.09, 20.82.

**<sup>19</sup>F NMR (376 MHz, DMSO-*d*<sub>6</sub>)** δ -77.76.

**HRMS m/z (ESI-TOF):** calculated for C<sub>17</sub>H<sub>17</sub>ClO<sub>2</sub>I<sup>+</sup> [M-OTf]<sup>+</sup> 414.9962, found 414.9986.

**Methyl 2-(mesityl(((trifluoromethyl)sulfonyl)oxy)- λ<sup>3</sup>-iodaneyl)-3-methylbenzoate (2e)**

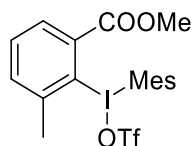

Prepared according to the **General procedure 1** on 1 mmol scale. The desired product of *ortho*-ester-substituted diaryliodonium salts (**2e**) was obtained as white solid (425 mg, 78%).

**M.P.:** 159-162 °C.

**<sup>1</sup>H NMR (400 MHz, DMSO-*d*<sub>6</sub>)** δ 7.82 (dd, *J* = 7.5, 1.4 Hz, 1H), 7.77 (d, *J* = 6.3 Hz, 1H), 7.69 (t, *J* = 7.6 Hz, 1H), 7.18 (s, 2H), 3.77 (s, 3H), 2.53 (s, 3H), 2.39 (s, 6H), 2.29 (s, 3H).

**<sup>13</sup>C NMR (101 MHz, DMSO-*d*<sub>6</sub>)** δ 166.19, 143.54, 143.00, 142.11, 135.95, 133.21, 132.44, 130.20, 129.85, 120.69(q, *J*<sub>C-F</sub> = 324.2Hz), 120.62, 119.09, 117.44, 53.38, 39.52, 25.37, 25.23, 20.38.

**<sup>19</sup>F NMR (376 MHz, DMSO-*d*<sub>6</sub>)** δ -77.77.

**HRMS m/z (ESI-TOF):** calculated for C<sub>18</sub>H<sub>20</sub>O<sub>2</sub>I<sup>+</sup> [M-OTf]<sup>+</sup> 395.0508, found 395.0488.

### Methyl 2-(mesityl(((trifluoromethyl)sulfonyl)oxy)-λ<sup>3</sup>-iodaneyl)-4-(trifluoromethyl)benzoate (**2f**)

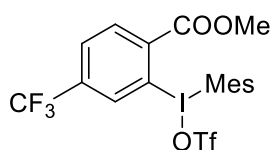

Prepared according to the **General procedure 1** on 1 mmol scale. The desired product of *ortho*-ester-substituted diaryliodonium salts (**2f**) was obtained as white solid (425 mg, 71%).

**M.P.:** 175-178 °C.

**<sup>1</sup>H NMR (400 MHz, DMSO-*d*<sub>6</sub>)** δ 8.48 (d, *J* = 8.0 Hz, 1H), 8.20 (d, *J* = 8.1 Hz, 1H), 7.45 (s, 2H), 6.89 (s, 1H), 4.10 (s, 3H), 2.53 (s, 6H), 2.44 (s, 3H).

**<sup>13</sup>C NMR (101 MHz, DMSO-*d*<sub>6</sub>)** δ 167.03, 145.05, 143.30, 135.41, 135.08, 133.59, 131.87, 130.20, 126.71(dd, *J*<sub>C-F</sub> = 394.9, 4.0Hz), 122.29(q, *J*<sub>C-F</sub> = 274.7Hz), 120.68(q, *J*<sub>C-F</sub> = 323.2Hz), 118.44, 115.14, 54.86, 39.52, 26.00, 20.76.

**<sup>19</sup>F NMR (376 MHz, DMSO-*d*<sub>6</sub>)** δ -62.28, -77.80.

**HRMS m/z (ESI-TOF):** calculated for C<sub>18</sub>H<sub>17</sub>F<sub>3</sub>O<sub>2</sub>I<sup>+</sup> [M-OTf]<sup>+</sup> 449.0225, found 449.0206.

### Methyl 4-bromo-2-(mesityl(((trifluoromethyl)sulfonyl)oxy)-λ<sup>3</sup>-iodaneyl)benzoate (**2g**)

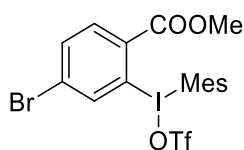

Prepared according to the **General procedure 1** on 1 mmol scale. The desired product of *ortho*-ester-substituted diaryliodonium salts (**2g**) was obtained as white solid (487 mg, 80%).

**M.P.:** 187-190 °C.

**<sup>1</sup>H NMR (400 MHz, DMSO-*d*<sub>6</sub>)** δ 8.20 (d, *J* = 8.3 Hz, 1H), 8.03 (d, *J* = 1.7 Hz, 1H), 7.44 (s, 2H), 6.77 (d, *J* = 1.7 Hz, 1H), 4.05 (s, 3H), 2.53 (s, 6H), 2.44 (s, 3H).

**<sup>13</sup>C NMR (101 MHz, DMSO-*d*<sub>6</sub>)** δ 167.49, 144.94, 143.30, 134.50, 134.00, 130.63, 130.49, 130.26, 127.16, 120.69(q, *J*<sub>C-F</sub> = 324.2Hz), 118.32, 115.47, 54.62, 39.52, 26.08, 20.82.

**<sup>19</sup>F NMR (376 MHz, DMSO-*d*<sub>6</sub>)** δ -77.76.

**HRMS m/z (ESI-TOF):** calculated for C<sub>17</sub>H<sub>17</sub>BrO<sub>2</sub>I<sup>+</sup> [M-OTf]<sup>+</sup> 458.9457, found 458.9435.

**Methyl 2-(mesityl(((trifluoromethyl)sulfonyl)oxy)- $\lambda^3$ -iodaneyl)-4,5-dimethoxybenzoate (2h)**

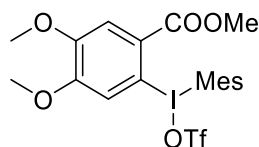

Prepared according to the *General procedure 1* on 1 mmol scale. The desired product of *ortho*-ester-substituted diaryliodonium salts (**2h**) was obtained as white solid (442 mg, 75%).

**M.P.:** 190-193 °C.

**<sup>1</sup>H NMR (400 MHz, DMSO-*d*<sub>6</sub>)**  $\delta$  7.73 (s, 1H), 7.41 (s, 2H), 6.11 (s, 1H), 4.04 (s, 3H), 3.88 (s, 3H), 2.52 (d, *J* = 7.5 Hz, 6H), 2.41 (s, 3H).

**<sup>13</sup>C NMR (101 MHz, DMSO-*d*<sub>6</sub>)**  $\delta$  167.77, 155.12, 150.35, 144.65, 143.22, 129.97, 120.69(q, *J*<sub>C-F</sub> = 324.2Hz), 119.74, 118.50, 114.04, 110.35, 104.53, 56.30, 55.56, 54.30, 39.52, 26.12, 20.75.

**<sup>19</sup>F NMR (376 MHz, DMSO-*d*<sub>6</sub>)**  $\delta$  -77.77.

**HRMS m/z (ESI-TOF):** calculated for C<sub>19</sub>H<sub>22</sub>O<sub>4</sub>I<sup>+</sup> [M-OTf]<sup>+</sup> 441.0563, found 441.0541.

**Methyl 5-fluoro-2-(mesityl(((trifluoromethyl)sulfonyl)oxy)- $\lambda^3$ -iodaneyl)benzoate (2i)**

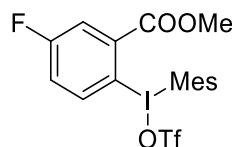

Prepared according to the *General procedure 1* on 1 mmol scale. The desired product of *ortho*-ester-substituted diaryliodonium salts (**2i**) was obtained as white solid (438 mg, 80%).

**M.P.:** 186-189 °C.

**<sup>1</sup>H NMR (400 MHz, CDCl<sub>3</sub>)**  $\delta$  8.03 (dd, *J* = 8.1, 2.9 Hz, 1H), 7.30 (ddd, *J* = 10.0, 7.3, 2.9 Hz, 1H), 7.20 (s, 2H), 6.79 (dd, *J* = 9.0, 4.6 Hz, 1H), 4.13 (s, 3H), 2.55 (s, 6H), 2.42 (s, 3H).

**<sup>13</sup>C NMR (101 MHz, CDCl<sub>3</sub>)**  $\delta$  166.81, 162.99, 145.57, 143.91, 130.61(d, *J*<sub>C-F</sub> = 8.1Hz), 129.56(d, *J*<sub>C-F</sub> = 8.1Hz), 124.40(d, *J*<sub>C-F</sub> = 23.2Hz), 120.79(d, *J*<sub>C-F</sub> = 23.2Hz), 120.42(q, *J*<sub>C-F</sub> = 321.2Hz), 117.53(d, *J*<sub>C-F</sub> = 263.6Hz), 117.40, 116.22, 105.91(d, *J*<sub>C-F</sub> = 3.0Hz), 77.16, 55.21, 26.94, 26.84, 21.43.

**<sup>19</sup>F NMR (376 MHz, CDCl<sub>3</sub>)**  $\delta$  -77.23, -109.22.

**HRMS m/z (ESI-TOF):** calculated for C<sub>17</sub>H<sub>17</sub>FO<sub>2</sub>I<sup>+</sup> [M-OTf]<sup>+</sup> 399.0257, found 399.0240.

**Methyl 2-(mesityl(((trifluoromethyl)sulfonyl)oxy)- $\lambda^3$ -iodaneyl)-5-methylbenzoate (2j)**

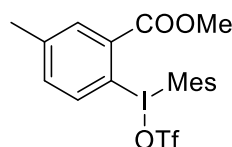

Prepared according to the *General procedure 1* on 1 mmol scale. The desired product of *ortho*-ester-substituted diaryliodonium salts (**2j**) was obtained as white solid (478 mg, 88%).

**M.P.:** 176-179 °C.

**<sup>1</sup>H NMR (400 MHz, DMSO-*d*<sub>6</sub>)**  $\delta$  8.76 (d, *J* = 1.6 Hz, 1H), 8.04 (dd, *J* = 8.5, 1.6 Hz, 1H), 7.90 (s, 2H), 7.34 (d, *J* = 8.5 Hz, 1H), 4.65 (s, 3H), 3.06 (s, 6H), 3.00 (s, 6H).

**<sup>13</sup>C NMR (101 MHz, DMSO-*d*<sub>6</sub>)** δ 167.93, 144.51, 143.18, 141.86, 137.91, 133.36, 130.12, 128.43, 127.33, 120.68(q, *J*<sub>C-F</sub> = 324.2 Hz), 117.83, 109.87, 54.38, 39.52, 26.09, 20.78, 20.09.

**<sup>19</sup>F NMR (377 MHz, DMSO-*d*<sub>6</sub>)** δ -77.76.

**HRMS m/z (ESI-TOF):** calculated for C<sub>18</sub>H<sub>20</sub>O<sub>2</sub>I<sup>+</sup> [M-OTf]<sup>+</sup> 395.0508, found 395.0496.

**Methyl 5-chloro-2-(mesityl(((trifluoromethyl)sulfonyl)oxy)-λ<sup>3</sup>-iodaneyl)benzoate (2k)**

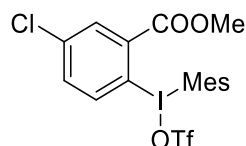

Prepared according to the *General procedure 1* on 1 mmol scale. The desired product of *ortho*-ester-substituted diaryliodonium salts (**2k**) was obtained as white solid (456 mg, 81%).

**M.P.:** 179-182°C.

**<sup>1</sup>H NMR (400 MHz, CDCl<sub>3</sub>)** δ 8.29 (d, *J* = 2.4 Hz, 1H), 7.51 (dd, *J* = 8.7, 2.4 Hz, 1H), 7.20 (s, 2H), 6.74 (d, *J* = 8.7 Hz, 1H), 4.14 (s, 3H), 2.55 (s, 6H), 2.43 (s, 3H).

**<sup>13</sup>C NMR (101 MHz, DMSO-*d*<sub>6</sub>)** δ 166.87, 144.73, 143.27, 136.66, 136.42, 132.15, 130.40, 130.23, 129.58, 120.68(q, *J*<sub>C-F</sub> = 324.2 Hz), 118.06, 111.93, 54.66, 39.52, 26.11, 20.78.

**<sup>19</sup>F NMR (377 MHz, DMSO-*d*<sub>6</sub>)** δ -77.76.

**HRMS m/z (ESI-TOF):** calculated for C<sub>17</sub>H<sub>17</sub>ClO<sub>2</sub>I<sup>+</sup> [M-OTf]<sup>+</sup> 414.9962, found 414.9946.

**Methyl 5-bromo-2-(mesityl(((trifluoromethyl)sulfonyl)oxy)-λ<sup>3</sup>-iodaneyl)benzoate (2l)**

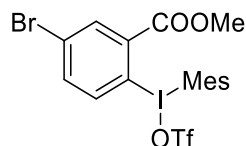

Prepared according to the *General procedure 1* on 1 mmol scale. The desired product of *ortho*-ester-substituted diaryliodonium salts (**2l**) was obtained as white solid (510 mg, 84%).

**M.P.:** 170-173°C.

**<sup>1</sup>H NMR (400 MHz, CDCl<sub>3</sub>)** δ 8.43 (d, *J* = 2.3 Hz, 1H), 7.65 (dd, *J* = 8.7, 2.3 Hz, 1H), 7.20 (s, 2H), 6.66 (d, *J* = 8.7 Hz, 1H), 4.14 (s, 3H), 2.55 (s, 6H), 2.43 (s, 3H).

**<sup>13</sup>C NMR (101 MHz, DMSO-*d*<sub>6</sub>)** δ 166.84, 144.76, 143.31, 139.62, 135.00, 130.53, 130.26, 129.68, 124.79, 120.70(q, *J*<sub>C-F</sub> = 324.2 Hz), 118.01, 112.75, 54.69, 39.52, 26.14, 20.82.

**<sup>19</sup>F NMR (377 MHz, DMSO-*d*<sub>6</sub>)** δ -77.76.

**HRMS m/z (ESI-TOF):** calculated for C<sub>17</sub>H<sub>17</sub>BrO<sub>2</sub>I<sup>+</sup> [M-OTf]<sup>+</sup> 458.9457, found 458.9445.

**Methyl 2-fluoro-6-(mesityl(((trifluoromethyl)sulfonyl)oxy)-λ<sup>3</sup>-iodaneyl)benzoate (2m)**

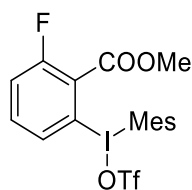

Prepared according to the **General procedure 1** on 1 mmol scale. The desired product of *ortho*-ester-substituted diaryliodonium salts (**2m**) was obtained as white solid (427 mg, 78%).

**M.P.:** 140-143°C.

**<sup>1</sup>H NMR (400 MHz, DMSO-*d*<sub>6</sub>)** δ 7.78 – 7.67 (m, 2H), 7.39 (s, 2H), 6.79 (d, *J* = 7.3 Hz, 1H), 4.06 (s, 3H), 2.52 (s, 6H), 2.41 (s, 3H).

**<sup>13</sup>C NMR (101 MHz, DMSO-*d*<sub>6</sub>)** δ 166.78, 164.33, 161.69, 144.68, 143.23, 138.30, 138.20, 130.19, 125.39(d, *J*<sub>C-F</sub> = 3.0Hz), 120.71(q, *J*<sub>C-F</sub> = 322.2Hz), 120.36(d, *J*<sub>C-F</sub> = 24.2Hz), 116.88(d, *J*<sub>C-F</sub> = 7.1Hz), 116.04, 54.79, 39.52, 26.08, 20.80.

**<sup>19</sup>F NMR (376 MHz, DMSO-*d*<sub>6</sub>)** δ -77.77, -100.41.

**HRMS m/z (ESI-TOF):** calculated for C<sub>17</sub>H<sub>17</sub>FO<sub>2</sub>I<sup>+</sup> [M-OTf]<sup>+</sup> 399.0257, found 399.0240.

### Part 3. Table of reaction condition optimization

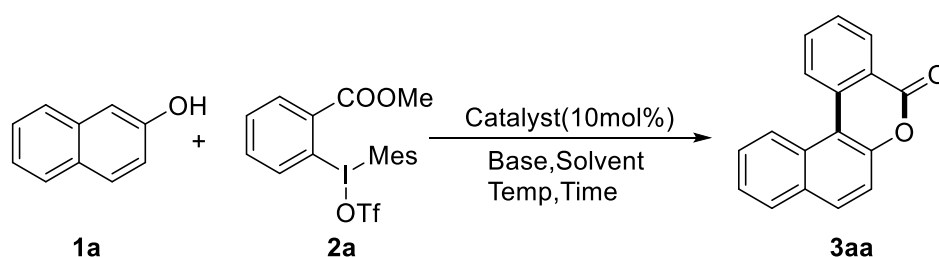

**Table S1: Base optimization**

| Entry | Base                            | Yield |
|-------|---------------------------------|-------|
| 1     | K <sub>2</sub> CO <sub>3</sub>  | 27%   |
| 2     | Na <sub>2</sub> CO <sub>3</sub> | 25%   |
| 3     | Cs <sub>2</sub> CO <sub>3</sub> | 16%   |
| 4     | KOH                             | 24%   |
| 5     | KH <sub>2</sub> PO <sub>4</sub> | 10%   |
| 6     | /                               | 50%   |
| 7     | DMAP                            | 26%   |
| 8     | NaOt-Bu                         | 35%   |
| 9     | LiHMDS                          | 30%   |
| 10    | NaHMDS                          | 20%   |
| 11    | HNa                             | 0%    |

Reaction conditions unless specifically noted: **1a** (43.2 mg, 0.3 mmol, 1.0 equiv), **2a** (174.9 mg, 0.33 mmol, 1.1 equiv), base (0.3 mmol, 1.0 equiv), and catalyst Cu(OTf)<sub>2</sub> (10.8 mg, 0.03 mmol, 10 mol %) in solvent DCE (2 mL) at 80 °C for 3 h. Isolated yields were obtained after purification with column chromatography.

**Table S2: Solvent optimization**

| Entry | Solvent | Yield |
|-------|---------|-------|
| 1     | DCE     | 50%   |
| 2     | DMSO    | 45%   |
| 3     | DMF     | 23%   |
| 4     | NMP     | 0%    |
| 5     | Toluene | 10%   |

|    |                                |     |
|----|--------------------------------|-----|
| 6  | AcOH                           | 0%  |
| 7  | MeCN                           | 36% |
| 8  | DMA                            | 35% |
| 9  | EA                             | 17% |
| 10 | H <sub>2</sub> O               | 0%  |
| 11 | Ethanol                        | 28% |
| 12 | DCE/H <sub>2</sub> O (1/1)     | 0%  |
| 13 | Cyclohexane                    | 30% |
| 14 | Cyclohexane/ Ethyl ether (1/1) | 0%  |
| 15 | DMSO (110 °C)                  | 40% |
| 16 | DMSO (130 °C)                  | 37% |
| 17 | DCE (12 h)                     | 48% |

Reaction conditions unless specifically noted: **1a** (43.2 mg, 0.3 mmol, 1.0 equiv), **2a** (174.9 mg, 0.33 mmol, 1.1 equiv), and catalyst Cu(OTf)<sub>2</sub> (10.8 mg, 0.03 mmol, 10 mol %) in solvent (2 mL) at 80 °C for 3 h. Isolated yields were obtained after purification with column chromatography.

**Table S3: Catalyst optimization**

| Entry          | Catalyst                                          | Yield    |
|----------------|---------------------------------------------------|----------|
| 1              | Cu(OAc) <sub>2</sub>                              | 61%      |
| 2 <sup>a</sup> | Cu(OTf) <sub>2</sub>                              | 50%(48%) |
| 3              | Pd(OAc) <sub>2</sub>                              | 22%      |
| 4              | Cu(CF <sub>3</sub> SO <sub>3</sub> ) <sub>2</sub> | 32%      |
| 5              | Pd(PPh <sub>3</sub> ) <sub>4</sub>                | 20%      |
| 6              | /                                                 | 0%       |
| 7              | PdCl <sub>2</sub>                                 | 40%      |
| 8              | Pd(acac) <sub>2</sub>                             | 24%      |
| 9              | FeCl <sub>3</sub>                                 | 21%      |
| 10             | AgOAc                                             | 20%      |

Reaction conditions unless specifically noted: **1a** (43.2 mg, 0.3 mmol, 1.0 equiv), **2a** (174.9 mg, 0.33 mmol, 1.1 equiv), and catalyst (0.03 mmol, 10 mol %) in solvent DCE (2 mL) at 80 °C for 3 h. Isolated yields were obtained after purification with column chromatography. <sup>a</sup>The reaction time was 12 hours.

#### Part 4. Synthesis and characterization of 3,4-benzocoumarins

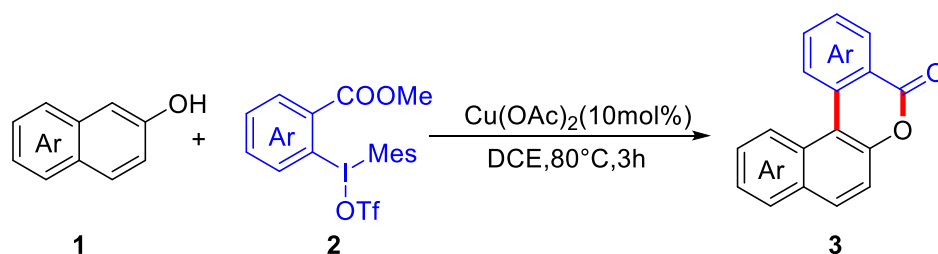

**General procedure 2:** To an oven-dried Schlenk tube was added 2-Naphthol **1** (0.3 mmol, 1.0 equiv) *ortho*-ester-substituted diaryliodonium salt **2** (0.33 mmol, 1.1 equiv) Cu(OAc)<sub>2</sub> (0.03 mmol, 10% equiv) and DCE (2 mL). The mixture was stirred at 80 °C in an oil bath until TLC indicated that the 2-naphthol was completely consumed. The solvent was evaporated under vacuum. The crude products were purified using flash column chromatography (eluent: petroleum ether: EtOAc) on silica gel to afford the desired product **3**.

The compounds are difficult to purify by chromatography due to their high lipophilicity and the yields may deviate slightly. The impurity in the NMR spectra mainly arise from solvent impurities.

### 5*H*-Dibenzo[*c,f*]chromen-5-one (3aa)

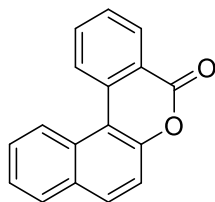

The preparation was according to the **general procedure 2** on 0.3 mmol scale, and obtained an isolated yield of 61% (45 mg) as yellow solid after column chromatography (petroleum ether: EtOAc = 8:1) on silica gel.

**<sup>1</sup>H NMR (400 MHz, CDCl<sub>3</sub>)** δ 8.78 (d, *J* = 8.6 Hz, 1H), 8.66 (d, *J* = 8.3 Hz, 1H), 8.51 (dd, *J* = 7.9, 1.3 Hz, 1H), 7.99 – 7.86 (m, 3H), 7.72 – 7.61 (m, 2H), 7.56 (ddd, *J* = 8.0, 6.9, 1.0 Hz, 1H), 7.49 (d, *J* = 8.9 Hz, 1H).

Analytical data are consistent with the reported ones [3].

The peak at 1.58 ppm is the water peak from CDCl<sub>3</sub>, which cannot be removed, and is similar to the following

### 11-Bromo-5*H*-dibenzo[*c,f*]chromen-5-one (3ab)

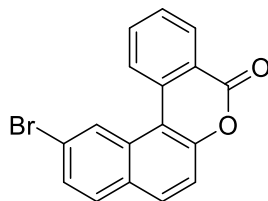

The preparation was according to the **general procedure 2** on 0.3 mmol scale, and obtained an isolated yield of 63% (61 mg) as yellow solid after column chromatography (petroleum ether: EtOAc = 8:1) on silica gel.

**M.P.:** 131-134°C.

**<sup>1</sup>H NMR (400 MHz, CDCl<sub>3</sub>)** δ 8.50 (dd, *J* = 7.9, 1.1 Hz, 1H), 8.42 (dd, *J* = 8.0, 1.5 Hz, 1H), 7.97 – 7.91 (m, 1H), 7.88 (d, *J* = 8.9 Hz, 1H), 7.80 (d, *J* = 8.7 Hz, 1H), 7.59 – 7.56 (m, 2H), 7.51 – 7.46 (m, 2H).

**<sup>13</sup>C NMR (101 MHz, CDCl<sub>3</sub>)** δ 161.08, 150.82, 134.87, 134.83, 131.40, 130.96, 130.87, 130.71, 130.13, 128.89, 128.66, 127.46, 126.10, 122.73, 122.37, 118.18, 111.98, 77.16.

**HRMS m/z (EI-TOF):** calculated for C<sub>17</sub>H<sub>9</sub>BrO<sub>2</sub> [M]<sup>+</sup> 323.9786, found 323.9787.

### 11-Methyl-5*H*-dibenzo[*c,f*]chromen-5-one (3ac)

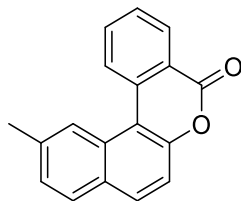

The preparation was according to the **general procedure 2** on 0.3 mmol scale, and obtained an isolated yield of 80% (62 mg) as yellow solid after column chromatography (petroleum ether: EtOAc = 8:1) on silica gel.

**M.P.:** 133-136°C.

**<sup>1</sup>H NMR (400 MHz, CDCl<sub>3</sub>)** δ 8.66 (d, *J* = 8.3 Hz, 1H), 8.54 (s, 1H), 8.50 (dd, *J* = 7.9, 1.2 Hz, 1H), 7.88 (ddd, *J* = 20.2, 9.4, 4.9 Hz, 3H), 7.66 – 7.59 (m, 1H), 7.40 (dd, *J* = 13.0, 5.0 Hz, 2H), 2.62 (s, 3H).

**<sup>13</sup>C NMR (101 MHz, CDCl<sub>3</sub>)** δ 161.57, 150.56, 137.97, 135.70, 134.43, 131.42, 130.80, 129.94, 129.92, 129.29, 128.15, 127.56, 126.47, 124.47, 122.40, 116.73, 112.15, 77.16, 22.51.

**HRMS m/z (EI-TOF):** calculated for C<sub>18</sub>H<sub>12</sub>O<sub>2</sub> [M]<sup>+</sup> 260.0837, found 260.0840.

### 11-Methoxy-5*H*-dibenzo[*c,f*]chromen-5-one (3ad)

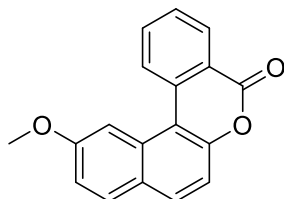

The preparation was according to the **general procedure 2** on 0.3 mmol scale, and obtained an isolated yield of 77% (64 mg) as yellow solid after column chromatography (petroleum ether: EtOAc = 8:1) on silica gel.

**M.P.:** 129-132°C.

**<sup>1</sup>H NMR (400 MHz, CDCl<sub>3</sub>)** δ 8.69 (d, *J* = 8.3 Hz, 1H), 8.51 (dd, *J* = 7.9, 1.2 Hz, 1H), 8.15 (d, *J* = 2.2 Hz, 1H), 7.92 – 7.83 (m, 3H), 7.65 – 7.59 (m, 1H), 7.35 (d, *J* = 8.8 Hz, 1H), 7.23 (dd, *J* = 8.9, 2.4 Hz, 1H), 4.00 (s, 3H).

**<sup>13</sup>C NMR (101 MHz, CDCl<sub>3</sub>)** δ 161.56, 159.63, 151.14, 135.89, 134.47, 131.46, 131.14, 131.01, 130.96, 128.10, 127.00, 125.71, 122.39, 116.59, 115.29, 111.86, 105.95, 77.16, 55.69.

**HRMS m/z (EI-TOF):** calculated for C<sub>18</sub>H<sub>12</sub>O<sub>3</sub> [M]<sup>+</sup> 276.0786, found 276.0791.

### 11-Phenyl-5*H*-dibenzo[*c,f*]chromen-5-one (3ae)

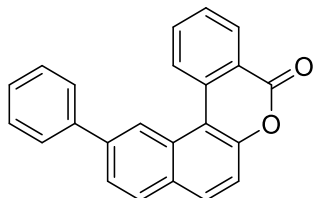

The preparation was according to the **general procedure 2** on 0.3 mmol scale, and obtained an isolated yield of 26% (26 mg) as yellow solid after column chromatography (petroleum ether: EtOAc = 8:1) on silica gel.

**M.P.:** 139-142°C.

**<sup>1</sup>H NMR (400 MHz, CDCl<sub>3</sub>)** δ 8.96 – 8.94 (m, 1H), 8.86 (d, *J* = 0.6 Hz, 1H), 8.62 (d, *J* = 8.3 Hz, 1H), 8.49 (dd, *J* = 7.9, 1.3 Hz, 1H), 7.97 (d, *J* = 8.4 Hz, 1H), 7.91 – 7.83 (m, 2H), 7.76 (dd, *J* = 8.4, 1.6 Hz, 1H), 7.71 (dd, *J* = 5.2, 3.4 Hz, 2H), 7.64 – 7.58 (m, 1H), 7.53 (dd, *J* = 10.3, 4.8 Hz, 2H), 7.44 (dt, *J* = 7.3, 2.9 Hz, 2H).

**<sup>13</sup>C NMR (101 MHz, CDCl<sub>3</sub>)** δ 161.35, 150.67, 141.06, 140.69, 135.45, 134.54, 131.29, 130.85, 130.77, 129.94, 129.87, 129.19, 128.29, 127.93, 127.67, 126.37, 125.16, 123.31, 122.43, 117.63, 112.83, 77.16.

**HRMS m/z (EI-TOF):** calculated for C<sub>23</sub>H<sub>14</sub>O<sub>2</sub> [M]<sup>+</sup> 322.0994, found 322.0990.



### 10-Methyl-5*H*-dibenzo[*c,f*]chromen-5-one (3af)

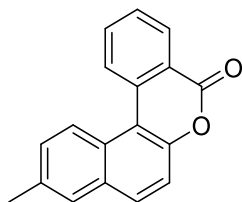

The preparation was according to the **general procedure 2** on 0.3 mmol scale, and obtained an isolated yield of 31% (25 mg) as yellow solid after column chromatography (petroleum ether: EtOAc = 8:1) on silica gel.

**M.P.:** 141-144°C.

**<sup>1</sup>H NMR (400 MHz, CDCl<sub>3</sub>)** δ 8.67 – 8.59 (m, 2H), 8.49 (dd, *J* = 7.9, 1.2 Hz, 1H), 7.90 – 7.85 (m, 1H), 7.82 (d, *J* = 8.9 Hz, 1H), 7.70 (s, 1H), 7.64 – 7.59 (m, 1H), 7.48 (dd, *J* = 8.8, 1.7 Hz, 1H), 7.44 (d, *J* = 8.9 Hz, 1H), 2.55 (s, 3H).

**<sup>13</sup>C NMR (101 MHz, CDCl<sub>3</sub>)** δ 161.56, 149.91, 135.65, 135.23, 134.43, 132.04, 131.11, 130.81, 130.01, 128.62, 128.21, 127.69, 126.47, 124.97, 122.44, 117.67, 112.60, 77.16, 21.35.

**HRMS m/z (EI-TOF):** calculated for C<sub>18</sub>H<sub>12</sub>O<sub>2</sub> [M]<sup>+</sup> 260.0837, found 260.0841.

### 5-Oxo-5*H*-dibenzo[*c,f*]chromene-10-carbaldehyde (3ag)

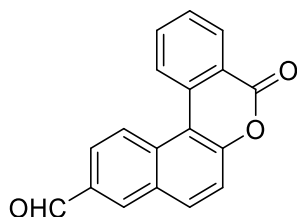

The preparation was according to the **general procedure 2** on 0.3 mmol scale, and obtained an isolated yield of 28% (23 mg) as yellow solid after column chromatography (petroleum ether: EtOAc = 8:1) on silica gel.

**M.P.:** 145-148°C.

**<sup>1</sup>H NMR (400 MHz, CDCl<sub>3</sub>)** δ 10.22 (s, 1H), 8.89 (d, *J* = 8.9 Hz, 1H), 8.62 (d, *J* = 8.2 Hz, 1H), 8.53 (d, *J* = 7.8 Hz, 1H), 8.46 (s, 1H), 8.15 (dd, *J* = 8.9, 1.5 Hz, 1H), 8.10 (d, *J* = 8.8 Hz, 1H), 7.95 (t, *J* = 7.7 Hz, 1H), 7.70 (t, *J* = 7.6 Hz, 1H), 7.62 (d, *J* = 8.8 Hz, 1H).

**<sup>13</sup>C NMR (101 MHz, CDCl<sub>3</sub>)** δ 191.66, 160.91, 152.23, 134.86, 134.83, 134.79, 133.50, 132.81, 131.16, 131.06, 129.01, 126.61, 126.26, 125.14, 122.60, 119.16, 113.43, 111.88, 77.16.

**HRMS m/z (EI-TOF):** calculated for C<sub>18</sub>H<sub>10</sub>O<sub>3</sub> [M]<sup>+</sup> 274.0630, found 274.0633.

### 10-Bromo-5*H*-dibenzo[*c,f*]chromen-5-one (3ah)

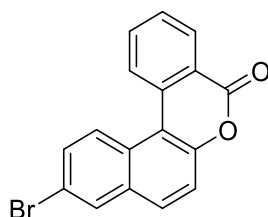

The preparation was according to the **general procedure 2** on 0.3 mmol scale, and obtained an isolated yield of 54% (52 mg) as yellow solid after column chromatography (petroleum ether: EtOAc = 8:1) on silica gel.

**M.P.:** 201-204°C.

**<sup>1</sup>H NMR (400 MHz, CDCl<sub>3</sub>)** δ 8.61 (d, *J* = 9.2 Hz, 1H), 8.56 – 8.47 (m, 2H), 8.08 (d, *J* = 2.1 Hz, 1H), 7.93 – 7.87 (m, 1H), 7.81 (d, *J* = 8.9 Hz, 1H), 7.71 (dd, *J* = 9.2, 2.1 Hz, 1H), 7.68 – 7.63 (m, 1H), 7.50 (d, *J* = 8.9 Hz, 1H).

**<sup>13</sup>C NMR (101 MHz, CDCl<sub>3</sub>)** δ 161.13, 150.39, 134.99, 134.65, 133.02, 131.37, 131.02, 130.98, 130.55, 128.72, 128.20, 126.84, 126.35, 122.56, 119.36, 118.95, 113.01, 77.16.

**HRMS m/z (EI-TOF):** calculated for C<sub>17</sub>H<sub>9</sub>BrO<sub>2</sub> [M]<sup>+</sup> 323.9786, found 323.9790.

### 10-Phenyl-5*H*-dibenzo[*c,f*]chromen-5-one (3ai)

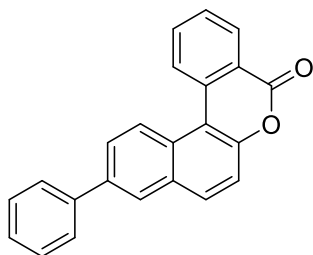

The preparation was according to the **general procedure 2** on 0.3 mmol scale, and obtained an isolated yield of 25% (24 mg) as yellow solid after column chromatography (petroleum ether: EtOAc = 8:1) on silica gel.

**M.P.:** 149-152°C.

**<sup>1</sup>H NMR (400 MHz, CDCl<sub>3</sub>)** δ 8.82 (d, *J* = 8.9 Hz, 1H), 8.67 (d, *J* = 8.2 Hz, 1H), 8.51 (dd, *J* = 7.9, 1.2 Hz, 1H), 8.13 (d, *J* = 1.8 Hz, 1H), 7.97 (d, *J* = 8.9 Hz, 1H), 7.94 – 7.88 (m, 2H), 7.76 (d, *J* = 7.3 Hz, 2H), 7.65 (t, *J* = 7.5 Hz, 1H), 7.55 – 7.49 (m, 3H), 7.43 (t, *J* = 7.3 Hz, 1H).

**<sup>13</sup>C NMR (101 MHz, CDCl<sub>3</sub>)** δ 161.42, 150.42, 140.16, 138.15, 135.49, 134.55, 132.15, 131.91, 130.89, 129.17, 128.77, 128.41, 127.88, 127.38, 127.32, 127.10, 126.49, 125.72, 122.51, 118.17, 112.71, 77.16.

**HRMS m/z (EI-TOF):** calculated for C<sub>23</sub>H<sub>14</sub>O<sub>2</sub> [M]<sup>+</sup> 322.0994, found 322.0998.

### 7-Bromo-5*H*-dibenzo[*c,f*]chromen-5-one (3aj)

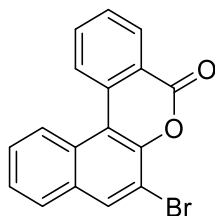

The preparation was according to the **general procedure 2** on 0.3 mmol scale, and obtained an isolated yield of 22% (20 mg) as yellow solid after column chromatography (petroleum ether: EtOAc = 8:1) on silica gel.

**M.P.:** 154-157°C.

**<sup>1</sup>H NMR (400 MHz, CDCl<sub>3</sub>)** δ 8.71 (d, *J* = 8.6 Hz, 1H), 8.62 (d, *J* = 8.3 Hz, 1H), 8.52 (dd, *J* = 7.9, 1.2 Hz, 1H), 8.22 (s, 1H), 7.94 – 7.89 (m, 1H), 7.87 (d, *J* = 8.1 Hz, 1H), 7.67 (dd, *J* = 11.3, 4.1 Hz, 2H), 7.61 – 7.55 (m, 1H).

**<sup>13</sup>C NMR (101 MHz, CDCl<sub>3</sub>)** δ 160.46, 146.54, 135.02, 134.63, 134.19, 131.97, 130.92, 129.01, 128.72, 128.52, 128.08, 126.97, 126.35, 125.35, 122.54, 114.48, 111.04, 77.16.

**HRMS m/z (EI-TOF):** calculated for C<sub>17</sub>H<sub>9</sub>BrO<sub>2</sub> [M]<sup>+</sup> 323.9786, found 323.9790.

### 7-Methyl-5H-dibenzo[*c,f*]chromen-5-one (3ak)

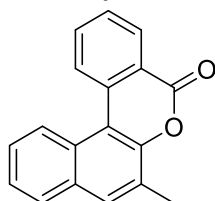

The preparation was according to the *general procedure 2* on 0.3 mmol scale, and obtained an isolated yield of 49% (38 mg) as yellow solid after column chromatography (petroleum ether: EtOAc = 8:1) on silica gel.

**M.P.:** 127-130°C.

**<sup>1</sup>H NMR (400 MHz, CDCl<sub>3</sub>)** δ 8.67 (d, *J* = 8.5 Hz, 1H), 8.60 (d, *J* = 8.3 Hz, 1H), 8.49 (dd, *J* = 7.9, 1.2 Hz, 1H), 7.86 (ddd, *J* = 8.9, 5.3, 1.6 Hz, 2H), 7.73 (s, 1H), 7.59 (ddd, *J* = 10.0, 8.2, 1.2 Hz, 2H), 7.53 – 7.47 (m, 1H), 2.60 (d, *J* = 0.8 Hz, 3H).

**<sup>13</sup>C NMR (101 MHz, CDCl<sub>3</sub>)** δ 161.44, 149.61, 135.71, 134.32, 131.43, 131.36, 130.63, 128.58, 128.42, 128.16, 126.85, 126.72, 126.60, 125.44, 124.99, 122.25, 112.47, 77.16, 16.92.

**HRMS m/z (EI-TOF):** calculated for C<sub>18</sub>H<sub>12</sub>O<sub>2</sub> [M]<sup>+</sup> 260.0837, found 260.0845.

### Methyl 5-oxo-5H-dibenzo[*c,f*]chromene-10-carboxylate (3al)

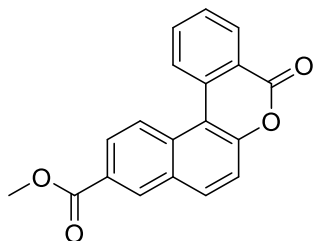

The preparation was according to the *general procedure 2* on 0.3 mmol scale, and obtained an isolated yield of 48% (44 mg) as yellow solid after column chromatography (petroleum ether: EtOAc = 8:1) on silica gel.

**M.P.:** 150-153°C.

**<sup>1</sup>H NMR (400 MHz, CDCl<sub>3</sub>)** δ 8.81 (d, *J* = 9.0 Hz, 1H), 8.68 (d, *J* = 1.6 Hz, 1H), 8.62 (d, *J* = 8.3 Hz, 1H), 8.52 (dd, *J* = 7.9, 1.1 Hz, 1H), 8.24 (dd, *J* = 9.0, 1.8 Hz, 1H), 8.03 (d, *J* = 8.9 Hz, 1H), 7.96 – 7.90 (m, 1H), 7.67 (t, *J* = 7.6 Hz, 1H), 7.56 (d, *J* = 8.9 Hz, 1H), 4.02 (s, 3H).

**<sup>13</sup>C NMR (101 MHz, CDCl<sub>3</sub>)** δ 166.80, 161.07, 151.76, 135.06, 134.73, 132.74, 132.19, 132.07, 131.01, 130.98, 128.77, 127.36, 127.09, 126.51, 125.40, 122.51, 118.73, 112.98, 77.16, 52.56.

**HRMS m/z (EI-TOF):** calculated for C<sub>19</sub>H<sub>12</sub>O<sub>4</sub> [M]<sup>+</sup> 304.0736, found 304.0741.

### Methyl 6-(2-(methoxycarbonyl)phenoxy)-2-naphthoate (3al')

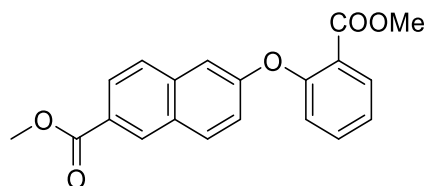

The preparation was according to the **general procedure 2** on 0.3 mmol scale, and obtained an isolated yield of 20% (20 mg) as yellow solid after column chromatography (petroleum ether: EtOAc = 8:1) on silica gel.

**M.P.:** 125-128°C.

**<sup>1</sup>H NMR (400 MHz, CDCl<sub>3</sub>)** δ 8.56 (s, 1H), 8.00 (dd, *J* = 8.3, 1.5 Hz, 2H), 7.93 (d, *J* = 8.9 Hz, 1H), 7.66 (d, *J* = 8.7 Hz, 1H), 7.58 – 7.51 (m, 1H), 7.34 – 7.26 (m, 2H), 7.12 (dd, *J* = 6.0, 1.8 Hz, 2H), 3.96 (s, 3H), 3.75 (s, 3H).

**<sup>13</sup>C NMR (101 MHz, CDCl<sub>3</sub>)** δ 129.66, 128.21, 120.53, 117.54, 99.15, 96.37, 94.62, 93.87, 93.32, 91.25, 89.65, 88.52, 88.44, 87.05, 86.19, 84.69, 82.34, 74.16, 39.52, 14.67, 14.62.

**HRMS m/z (EI-TOF):** calculated for C<sub>20</sub>H<sub>16</sub>O<sub>5</sub> [M]<sup>+</sup> 336.0998, found 336.1002.

### 8-Bromo-5H-dibenzo[*c,f*]chromen-5-one (3am)

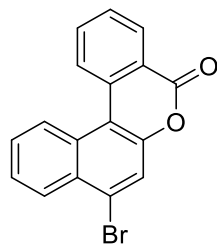

The preparation was according to the **general procedure 2** on 0.3 mmol scale, and obtained an isolated yield of 83% (81 mg) as yellow solid after column chromatography (petroleum ether: EtOAc = 8:1) on silica gel.

**M.P.:** 151-154°C.

**<sup>1</sup>H NMR (400 MHz, CDCl<sub>3</sub>)** δ 8.75 (d, *J* = 8.5 Hz, 1H), 8.58 (d, *J* = 8.3 Hz, 1H), 8.50 (dd, *J* = 7.9, 1.1 Hz, 1H), 8.40 (dd, *J* = 8.3, 1.0 Hz, 1H), 7.93 – 7.86 (m, 1H), 7.84 (s, 1H), 7.72 (ddd, *J* = 8.5, 6.9, 1.4 Hz, 1H), 7.66 (dd, *J* = 8.0, 7.1 Hz, 2H).

**<sup>13</sup>C NMR (101 MHz, CDCl<sub>3</sub>)** δ 160.90, 149.37, 134.95, 134.67, 131.02, 130.30, 130.19, 128.69, 128.60, 126.76, 126.69, 125.68, 125.55, 122.53, 121.75, 112.76, 77.16.

**HRMS m/z (EI-TOF):** calculated for C<sub>17</sub>H<sub>9</sub>BrO<sub>2</sub> [M]<sup>+</sup> 323.9786, found 323.9795.

### 6H-Dibenzo[*c,h*]chromen-6-one (3an)

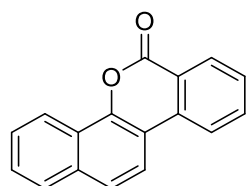

The preparation was according to the **general procedure 2** on 0.3 mmol scale, and obtained an isolated yield of 49% (36 mg) as yellow solid after column chromatography (petroleum ether: EtOAc = 8:1) on silica gel.

**M.P.:** 171-174°C.

**<sup>1</sup>H NMR (400 MHz, CDCl<sub>3</sub>)** δ 8.57 (d, *J* = 7.9 Hz, 1H), 8.46 (d, *J* = 7.9 Hz, 1H), 8.18 (d, *J* = 8.1 Hz, 1H), 8.04 (d, *J* = 8.7 Hz, 1H), 7.86 (t, *J* = 7.2 Hz, 2H), 7.75 (d, *J* = 8.7 Hz, 1H), 7.65 – 7.58 (m, 3H).

**<sup>13</sup>C NMR (101 MHz, CDCl<sub>3</sub>)** δ 161.38, 147.35, 135.50, 135.10, 134.36, 130.76, 128.74, 128.01, 127.77, 127.24, 124.62, 123.98, 122.44, 122.15, 121.27, 119.27, 113.14, 77.16.

**HRMS m/z (EI-TOF):** calculated for C<sub>17</sub>H<sub>10</sub>O<sub>2</sub> [M]<sup>+</sup> 246.0681, found 246.0685.

### 2-Methoxy-6*H*-dibenzo[*c,h*]chromen-6-one (3ao)

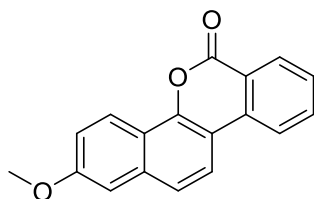

The preparation was according to the **general procedure 2** on 0.3 mmol scale, and obtained an isolated yield of 40% (33 mg) as yellow solid after column chromatography (petroleum ether: EtOAc = 8:1) on silica gel.

**M.P.:** 155-158°C.

**<sup>1</sup>H NMR (400 MHz, CDCl<sub>3</sub>)** δ 8.49 – 8.40 (m, 2H), 8.13 (d, *J* = 8.0 Hz, 1H), 8.00 (d, *J* = 8.8 Hz, 1H), 7.87 – 7.80 (m, 1H), 7.63 (d, *J* = 8.7 Hz, 1H), 7.58 – 7.52 (m, 1H), 7.27 – 7.23 (m, 2H), 7.15 (d, *J* = 2.5 Hz, 1H), 3.95 (s, 3H).

**<sup>13</sup>C NMR (101 MHz, CDCl<sub>3</sub>)** δ 161.52, 159.41, 147.62, 136.08, 135.77, 135.04, 130.70, 128.23, 124.15, 123.51, 121.81, 120.78, 120.02, 119.43, 118.93, 111.36, 106.36, 77.16, 55.49.

**HRMS m/z (EI-TOF):** calculated for C<sub>18</sub>H<sub>12</sub>O<sub>3</sub> [M]<sup>+</sup> 276.0786, found 276.0790.

### 12-Bromo-5*H*-dibenzo[*c,f*]chromen-5-one (3ap)

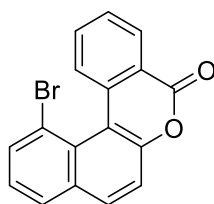

The preparation was according to the **general procedure 2** on 0.3 mmol scale, and obtained an isolated yield of 25% (24 mg) as yellow solid after column chromatography (petroleum ether: EtOAc = 8:1) on silica gel.

**M.P.:** 152-155°C.

**<sup>1</sup>H NMR (400 MHz, DMSO-*d*<sub>6</sub>)** δ 8.35 (d, *J* = 9.1 Hz, 1H), 8.15 (td, *J* = 8.3, 1.1 Hz, 2H), 8.06 (dd, *J* = 7.6, 1.1 Hz, 1H), 7.87 (ddd, *J* = 8.7, 7.2, 1.7 Hz, 1H), 7.74 (t, *J* = 9.1 Hz, 2H), 7.56 (ddd, *J* = 11.5, 9.5, 4.4 Hz, 2H).

**<sup>13</sup>C NMR (101 MHz, DMSO-*d*<sub>6</sub>)** δ 174.24, 158.03, 153.68, 136.38, 135.30, 134.33, 132.66, 128.84, 128.23, 127.15, 125.76, 125.12, 124.30, 120.31, 118.92, 117.55, 115.89, 39.52.

**HRMS m/z (EI-TOF):** calculated for C<sub>17</sub>H<sub>9</sub>BrO<sub>2</sub> [M]<sup>+</sup> 323.9786, found 323.9788.

### Methyl 5-oxo-5H-dibenzo[*c,f*]chromene-7-carboxylate (3aq)

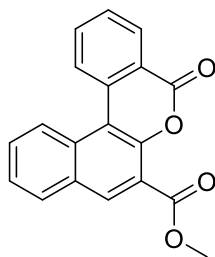

The preparation was according to the **general procedure 2** on 0.3 mmol scale, and obtained an isolated yield of 43% (39 mg) as yellow solid after column chromatography (petroleum ether: EtOAc = 8:1) on silica gel.

**M.P.:** 145-148°C.

**<sup>1</sup>H NMR (400 MHz, CDCl<sub>3</sub>)** δ 8.53 (s, 1H), 8.01 (dd, *J* = 7.8, 1.7 Hz, 1H), 7.93 (d, *J* = 8.1 Hz, 1H), 7.69 (d, *J* = 8.2 Hz, 1H), 7.58 – 7.53 (m, 1H), 7.52 – 7.44 (m, 2H), 7.26 – 7.21 (m, 1H), 6.99 (d, *J* = 8.2 Hz, 1H), 3.90 (s, 3H).

**<sup>13</sup>C NMR (101 MHz, CDCl<sub>3</sub>)** δ 166.21, 156.77, 156.51, 153.13, 135.88, 133.73, 133.62, 132.14, 129.30, 128.91, 128.68, 126.97, 125.74, 123.47, 122.86, 122.70, 120.11, 115.99, 77.16, 52.43.

**HRMS m/z (EI-TOF):** calculated for C<sub>19</sub>H<sub>12</sub>O<sub>4</sub> [M]<sup>+</sup> 304.0736, found 304.0741.

### 9,10,11,12-Tetrahydro-5H-dibenzo[*c,f*]chromen-5-one (3ar)

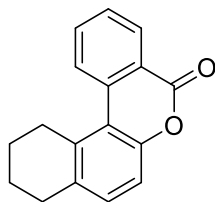

The preparation was according to the **general procedure 2** on 0.3 mmol scale, and obtained an isolated yield of 45% (34 mg) as yellow solid after column chromatography (petroleum ether: EtOAc = 8:1) on silica gel.

**M.P.:** 144-147°C.

**<sup>1</sup>H NMR (400 MHz, CDCl<sub>3</sub>)** δ 8.25 (d, *J* = 8.0 Hz, 1H), 7.64 (dd, *J* = 8.3, 7.1 Hz, 1H), 7.42 – 7.28 (m, 3H), 7.20 (d, *J* = 8.5 Hz, 1H), 3.52 (t, *J* = 5.5 Hz, 2H), 2.81 (s, 2H), 1.87 – 1.76 (m, 4H).

**<sup>13</sup>C NMR (101 MHz, CDCl<sub>3</sub>)** δ 179.28, 156.28, 155.24, 140.73, 135.94, 134.16, 133.23, 126.92, 123.61, 123.26, 119.87, 117.41, 115.41, 77.16, 30.35, 29.40, 23.30, 22.26.

**HRMS m/z (EI-TOF):** calculated for C<sub>17</sub>H<sub>14</sub>O<sub>2</sub> [M]<sup>+</sup> 250.0994, found 250.0998.

### 8,9,10,11-Tetrahydro-5H-dibenzo[*c,g*]chromen-5-one (3as)

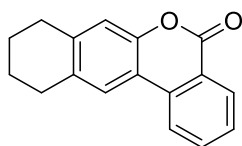

The preparation was according to the **general procedure 2** on 0.3 mmol scale, and obtained an isolated yield of 10% (7.5 mg) as yellow solid after column chromatography (petroleum ether: EtOAc = 8:1) on silica gel.

**M.P.:** 142-145°C.

**<sup>1</sup>H NMR (400 MHz, CDCl<sub>3</sub>)** δ 8.33 (dd, *J* = 8.0, 1.6 Hz, 1H), 8.02 (s, 1H), 7.69 (ddd, *J* = 8.7, 7.1, 1.7 Hz, 1H), 7.48 – 7.43 (m, 1H), 7.37 – 7.31 (m, 1H), 7.19 (s, 1H), 2.91 (dd, *J* = 6.0, 3.3 Hz, 4H), 1.88 – 1.82 (m, 4H).

**<sup>13</sup>C NMR (101 MHz, CDCl<sub>3</sub>)** δ 177.36, 156.38, 154.32, 146.13, 134.58, 133.80, 126.85, 126.29, 123.63, 121.96, 119.85, 118.02, 117.30, 77.16, 30.27, 28.95, 23.13, 22.78.

**HRMS m/z (EI-TOF):** calculated for C<sub>17</sub>H<sub>14</sub>O<sub>2</sub> [M]<sup>+</sup> 250.0994, found 250.0998.

### Methyl 2-((4-nitronaphthalen-1-yl)oxy)benzoate (3at)

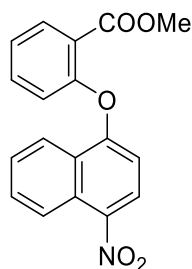

The preparation was according to the **general procedure 2** on 0.3 mmol scale, and obtained an isolated yield of 51% (49 mg) as yellow solid after column chromatography (petroleum ether: EtOAc = 8:1) on silica gel.

**M.P.:** 133-136°C.

**<sup>1</sup>H NMR (400 MHz, CDCl<sub>3</sub>)** δ 8.79 (d, *J* = 8.8 Hz, 1H), 8.58 (d, *J* = 8.1 Hz, 1H), 8.24 (d, *J* = 8.7 Hz, 1H), 8.09 (dd, *J* = 7.8, 1.7 Hz, 1H), 7.81 (ddd, *J* = 8.6, 6.9, 1.3 Hz, 1H), 7.67 (ddd, *J* = 17.3, 8.1, 1.3 Hz, 2H), 7.41 (td, *J* = 7.8, 1.0 Hz, 1H), 7.22 (d, *J* = 8.1 Hz, 1H), 6.51 (d, *J* = 8.7 Hz, 1H), 3.61 (s, 3H).

**<sup>13</sup>C NMR (101 MHz, CDCl<sub>3</sub>)** δ 165.26, 160.01, 153.99, 134.52, 132.83, 130.56, 130.51, 127.29, 127.24, 126.48, 126.09, 125.88, 124.13, 123.67, 123.39, 123.05, 106.49, 77.16, 52.40.

**HRMS m/z (EI-TOF):** calculated for C<sub>18</sub>H<sub>13</sub>NO<sub>5</sub> [M]<sup>+</sup> 323.0794, found 323.0799.

### 2-Methoxy-6H-benzo[*c*]chromen-6-one (3au)

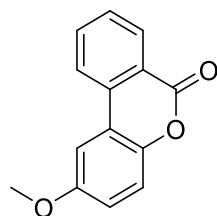

The preparation was according to the **general procedure 2** on 0.3 mmol scale, and obtained an isolated yield of 34% (23 mg) as yellow solid after column chromatography (petroleum ether: EtOAc = 8:1) on silica gel.

**M.P.:** 140-143°C.

**<sup>1</sup>H NMR (400 MHz, CDCl<sub>3</sub>)** δ 8.36 (dd, *J* = 8.0, 1.6 Hz, 1H), 7.75 – 7.70 (m, 2H), 7.50 (d, *J* = 8.5 Hz, 1H), 7.45 (d, *J* = 9.1 Hz, 1H), 7.40 – 7.36 (m, 1H), 7.34 (dd, *J* = 9.1, 3.1 Hz, 1H), 3.93 (s, 3H).

**<sup>13</sup>C NMR (101 MHz, CDCl<sub>3</sub>)** δ 177.27, 156.14, 151.16, 134.75, 126.84, 125.09, 123.87, 120.44, 119.58, 119.20, 118.12, 114.98, 105.96, 77.16, 56.09.

**HRMS m/z (EI-TOF):** calculated for C<sub>14</sub>H<sub>10</sub>O<sub>3</sub> [M]<sup>+</sup> 226.0630, found 226.0638.

### 2-(*tert*-Butyl)-6*H*-benzo[*c*]chromen-6-one (3av)

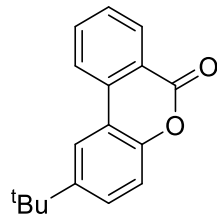

The preparation was according to the *general procedure 2* on 0.3 mmol scale, and obtained an isolated yield of 39% (29 mg) as yellow solid after column chromatography (petroleum ether: EtOAc = 8:1) on silica gel.

**M.P.:** 135-138°C.

**<sup>1</sup>H NMR (400 MHz, CDCl<sub>3</sub>)** δ 8.34 (dd, *J* = 8.0, 1.5 Hz, 1H), 8.32 (d, *J* = 2.5 Hz, 1H), 7.79 – 7.76 (m, 1H), 7.69 (ddd, *J* = 8.7, 7.1, 1.7 Hz, 1H), 7.46 (dd, *J* = 8.4, 0.5 Hz, 1H), 7.42 (d, *J* = 8.8 Hz, 1H), 7.37 – 7.32 (m, 1H), 1.40 (s, 9H).

**<sup>13</sup>C NMR (101 MHz, CDCl<sub>3</sub>)** δ 177.54, 156.24, 154.41, 147.15, 141.40, 134.69, 132.86, 131.02, 126.83, 123.79, 122.50, 118.00, 117.69, 77.16, 34.84, 31.45.

**HRMS m/z (EI-TOF):** calculated for C<sub>17</sub>H<sub>16</sub>O<sub>2</sub> [M]<sup>+</sup> 252.1150, found 252.1145.

### 4-Methyl-5*H*-dibenzo[*c,f*]chromen-5-one (3ca)

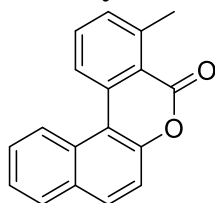

The preparation was according to the *general procedure 2* on 0.3 mmol scale, and obtained an isolated yield of 32% (25 mg) as yellow solid after column chromatography (petroleum ether: EtOAc = 8:1) on silica gel.

**M.P.:** 122-125°C.

**<sup>1</sup>H NMR (400 MHz, CDCl<sub>3</sub>)** δ 8.70 (d, *J* = 8.6 Hz, 1H), 8.44 (d, *J* = 8.2 Hz, 1H), 7.91 (dd, *J* = 15.5, 8.4 Hz, 2H), 7.72 (t, *J* = 7.9 Hz, 1H), 7.64 (ddd, *J* = 8.5, 6.9, 1.4 Hz, 1H), 7.56 – 7.51 (m, 1H), 7.44 (t, *J* = 7.5 Hz, 2H), 2.92 (s, 3H).

**<sup>13</sup>C NMR (101 MHz, CDCl<sub>3</sub>)** δ 160.68, 149.98, 143.92, 136.80, 133.44, 131.68, 131.45, 131.44, 129.66, 129.36, 127.65, 125.30, 125.21, 124.89, 121.13, 117.26, 113.17, 77.16, 23.81.

**HRMS m/z (EI-TOF):** calculated for C<sub>18</sub>H<sub>12</sub>O<sub>2</sub> [M]<sup>+</sup> 260.0837, found 260.0838.



### 2-Chloro-5*H*-dibenzo[*c,f*]chromen-5-one (3da)

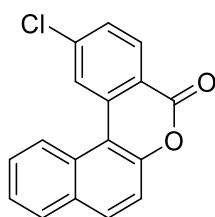

The preparation was according to the **general procedure 2** on 0.3 mmol scale, and obtained an isolated yield of 50% (42 mg) as yellow solid after column chromatography (petroleum ether: EtOAc = 8:1) on silica gel.

**M.P.:** 132-135°C.

**<sup>1</sup>H NMR (400 MHz, CDCl<sub>3</sub>)** δ 8.68 (d, *J* = 8.7 Hz, 1H), 8.61 (d, *J* = 1.7 Hz, 1H), 8.42 (d, *J* = 8.5 Hz, 1H), 7.97 – 7.93 (m, 2H), 7.71 (ddd, *J* = 8.4, 6.9, 1.3 Hz, 1H), 7.61 – 7.55 (m, 2H), 7.47 (d, *J* = 8.9 Hz, 1H).

**<sup>13</sup>C NMR (101 MHz, CDCl<sub>3</sub>)** δ 160.71, 150.97, 141.46, 136.90, 132.52, 132.40, 131.70, 129.63, 129.41, 128.68, 128.43, 126.28, 125.78, 124.62, 120.71, 117.65, 111.60, 77.16.

**HRMS m/z (EI-TOF):** calculated for C<sub>17</sub>H<sub>9</sub>ClO<sub>2</sub> [M]<sup>+</sup> 280.0291, found 280.0298.

### 1-Methyl-5*H*-dibenzo[*c,f*]chromen-5-one (3ea)

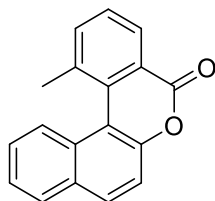

The preparation was according to the **general procedure 2** on 0.3 mmol scale, and obtained an isolated yield of 46% (36 mg) as yellow solid after column chromatography (petroleum ether: EtOAc = 8:1) on silica gel.

**M.P.:** 135-138°C.

**<sup>1</sup>H NMR (400 MHz, CDCl<sub>3</sub>)** δ 8.31 (d, *J* = 7.7 Hz, 1H), 7.94 (dd, *J* = 13.5, 8.3 Hz, 2H), 7.76 (dd, *J* = 15.4, 8.1 Hz, 2H), 7.60 – 7.47 (m, 4H), 2.35 (s, 3H).

**<sup>13</sup>C NMR (101 MHz, CDCl<sub>3</sub>)** δ 162.26, 149.87, 137.84, 135.67, 134.31, 131.16, 131.03, 129.39, 128.44, 128.11, 127.99, 127.04, 126.38, 125.29, 124.57, 117.16, 113.57, 77.16, 23.84.

**HRMS m/z (EI-TOF):** calculated for C<sub>18</sub>H<sub>12</sub>O<sub>2</sub> [M]<sup>+</sup> 260.0837, found 260.0838.

### 2-(Trifluoromethyl)-5*H*-dibenzo[*c,f*]chromen-5-one (3fa)

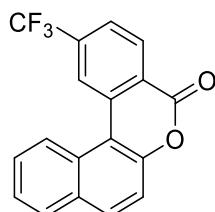

The preparation was according to the **general procedure 2** on 0.3 mmol scale, and obtained an isolated yield of 49% (46 mg) as yellow solid after column chromatography (petroleum ether: EtOAc = 8:1) on silica gel.

**M.P.:** 140-143°C.

**<sup>1</sup>H NMR (400 MHz, CDCl<sub>3</sub>)** δ 8.90 (s, 1H), 8.66 (d, *J* = 8.6 Hz, 1H), 8.61 (d, *J* = 8.2 Hz, 1H), 7.98 (d, *J* = 9.1 Hz, 2H), 7.85 (d, *J* = 7.8 Hz, 1H), 7.74 (ddd, *J* = 8.4, 7.0, 1.3 Hz, 1H), 7.61 (dd, *J* = 11.2, 3.9 Hz, 1H), 7.50 (d, *J* = 8.9 Hz, 1H).

**<sup>13</sup>C NMR (101 MHz, CDCl<sub>3</sub>)** δ 160.31, 150.90, 136.01, 135.94 (q, *J*<sub>C-F</sub> = 33.3 Hz), 132.80, 131.80, 131.72, 129.73, 129.35, 128.70, 125.95, 124.57 (q, *J*<sub>C-F</sub> = 4 Hz), 124.41, 123.62 (q, *J*<sub>C-F</sub> = 274.7 Hz), 123.56 (q, *J*<sub>C-F</sub> = 4 Hz), 117.56, 114.34, 111.76, 77.16.

**<sup>19</sup>F NMR (376 MHz, CDCl<sub>3</sub>)** δ -63.16.

**HRMS m/z (EI-TOF):** calculated for C<sub>18</sub>H<sub>9</sub>F<sub>3</sub>O<sub>2</sub> [M]<sup>+</sup> 314.0555, found 314.0558.

### 2-Bromo-5*H*-dibenzo[*c,f*]chromen-5-one (3ga)

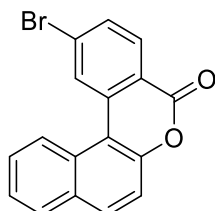

The preparation was according to the **general procedure 2** on 0.3 mmol scale, and obtained an isolated yield of 55% (53 mg) as yellow solid after column chromatography (petroleum ether: EtOAc = 8:1) on silica gel.

**M.P.:** 136-139°C.

**<sup>1</sup>H NMR (400 MHz, CDCl<sub>3</sub>)** δ 8.78 (d, *J* = 9.8 Hz, 1H), 8.65 (d, *J* = 8.6 Hz, 1H), 8.32 (d, *J* = 8.4 Hz, 1H), 7.94 (dd, *J* = 8.4, 3.1 Hz, 2H), 7.72 (ddd, *J* = 12.8, 8.4, 1.4 Hz, 2H), 7.57 (t, *J* = 7.5 Hz, 1H), 7.46 (d, *J* = 8.9 Hz, 1H).

**<sup>13</sup>C NMR (101 MHz, CDCl<sub>3</sub>)** δ 160.82, 150.94, 136.95, 132.51, 132.33, 131.69, 131.55, 130.21, 129.62, 129.37, 129.27, 128.46, 125.78, 124.58, 121.07, 117.63, 111.47, 77.16.

**HRMS m/z (EI-TOF):** calculated for C<sub>17</sub>H<sub>9</sub>BrO<sub>2</sub> [M]<sup>+</sup> 323.9786, found 323.9791.

### 2,3-Dimethoxy-5*H*-dibenzo[*c,f*]chromen-5-one (3ha)

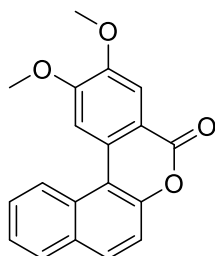

The preparation was according to the **general procedure 2** on 0.3 mmol scale, and obtained an isolated yield of 43% (39 mg) as yellow solid after column chromatography (petroleum ether: EtOAc = 8:1) on silica gel.

**M.P.:** 129-132°C.

**<sup>1</sup>H NMR (400 MHz, CDCl<sub>3</sub>)** δ 8.76 (d, *J* = 8.6 Hz, 1H), 8.08 (s, 1H), 7.96 (d, *J* = 7.7 Hz, 1H), 7.89 (d, *J* = 8.3 Hz, 2H), 7.67 (ddd, *J* = 8.5, 6.9, 1.3 Hz, 1H), 7.58 – 7.53 (m, 1H), 7.49 (d, *J* = 8.9 Hz, 1H), 4.11 (s, 3H), 4.05 (s, 3H).

**<sup>13</sup>C NMR (101 MHz, CDCl<sub>3</sub>)** δ 161.31, 154.55, 150.07, 149.54, 131.80, 130.80, 130.76, 129.66, 129.47, 127.69, 125.37, 124.58, 117.85, 115.88, 112.72, 110.93, 108.12, 77.16, 56.52, 56.47.

**HRMS m/z (EI-TOF):** calculated for C<sub>19</sub>H<sub>14</sub>O<sub>4</sub> [M]<sup>+</sup> 306.0892, found 306.0895.

### 3-Fluoro-5*H*-dibenzo[*c,f*]chromen-5-one (3ia)

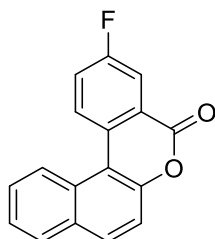

The preparation was according to the *general procedure 2* on 0.3 mmol scale, and obtained an isolated yield of 21% (17 mg) as yellow solid after column chromatography (petroleum ether: EtOAc = 8:1) on silica gel.

**M.P.:** 130-133°C.

**<sup>1</sup>H NMR (400 MHz, CDCl<sub>3</sub>)** δ 8.71 – 8.62 (m, 2H), 8.15 (dd, *J* = 8.4, 2.9 Hz, 1H), 7.93 (dd, *J* = 13.6, 8.2 Hz, 2H), 7.68 (ddd, *J* = 8.5, 6.9, 1.4 Hz, 1H), 7.63 – 7.53 (m, 2H), 7.48 (d, *J* = 8.9 Hz, 1H).

**<sup>13</sup>C NMR (101 MHz, CDCl<sub>3</sub>)** δ 160.56, 149.93, 132.08(d, *J*<sub>C-F</sub> = 3.0Hz), 131.95, 131.81, 131.63, 129.57, 129.37, 128.93(d, *J*<sub>C-F</sub> = 8.1Hz), 127.89, 126.88(d, *J*<sub>C-F</sub> = 243.4Hz), 124.85, 124.46(d, *J*<sub>C-F</sub> = 8.1Hz), 122.53(d, *J*<sub>C-F</sub> = 22.2Hz), 117.63, 116.50(d, *J*<sub>C-F</sub> = 23.2Hz), 112.13, 77.16.

**<sup>19</sup>F NMR (376 MHz, CDCl<sub>3</sub>)** δ -110.76.

**HRMS m/z (EI-TOF):** calculated for C<sub>17</sub>H<sub>9</sub>FO<sub>2</sub> [M]<sup>+</sup> 264.0587, found 264.0580.

### 3-Methyl-5*H*-dibenzo[*c,f*]chromen-5-one (3ja)

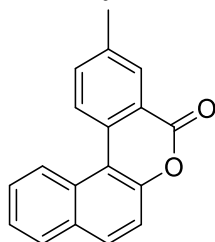

The preparation was according to the *general procedure 2* on 0.3 mmol scale, and obtained an isolated yield of 59% (46 mg) as yellow solid after column chromatography (petroleum ether: EtOAc = 8:1) on silica gel.

**M.P.:** 154-157°C.

**<sup>1</sup>H NMR (400 MHz, CDCl<sub>3</sub>)** δ 8.74 (d, *J* = 8.6 Hz, 1H), 8.53 (d, *J* = 8.4 Hz, 1H), 8.29 (d, *J* = 0.8 Hz, 1H), 7.93 (d, *J* = 7.9 Hz, 1H), 7.88 (d, *J* = 8.9 Hz, 1H), 7.71 – 7.62 (m, 2H), 7.57 – 7.51 (m, 1H), 7.46 (d, *J* = 8.9 Hz, 1H), 2.54 (s, 3H).

**<sup>13</sup>C NMR (101 MHz, CDCl<sub>3</sub>)** δ 161.62, 149.98, 138.66, 135.64, 132.96, 131.72, 131.10, 130.65, 129.61, 129.41, 127.73, 126.45, 125.40, 125.16, 122.30, 117.69, 112.78, 77.16, 21.29.

**HRMS m/z (EI-TOF):** calculated for C<sub>18</sub>H<sub>12</sub>O<sub>2</sub> [M]<sup>+</sup> 260.0837, found 260.0831.

### 8-Methyl-6H-dibenzo[*c,h*]chromen-6-one (3jb)

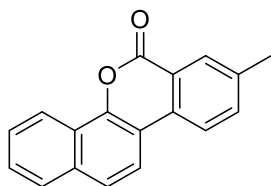

The preparation was according to the **general procedure 2** on 0.3 mmol scale, and obtained an isolated yield of 28% (22 mg) as yellow solid after column chromatography (petroleum ether: EtOAc = 8:1) on silica gel.

**M.P.:** 150-153°C.

**<sup>1</sup>H NMR (400 MHz, CDCl<sub>3</sub>)** δ 8.57 (d, *J* = 8.0 Hz, 1H), 8.26 (s, 1H), 8.05 (dd, *J* = 16.5, 8.5 Hz, 2H), 7.86 (d, *J* = 7.4 Hz, 1H), 7.75 (d, *J* = 8.8 Hz, 1H), 7.66 (dd, *J* = 8.2, 1.4 Hz, 1H), 7.61 (ddd, *J* = 9.1, 7.7, 1.1 Hz, 2H), 2.51 (s, 3H).

**<sup>13</sup>C NMR (101 MHz, CDCl<sub>3</sub>)** δ 161.57, 146.86, 139.09, 136.31, 134.10, 132.94, 130.51, 130.48, 127.75, 127.15, 124.52, 123.97, 122.32, 122.12, 121.08, 119.26, 113.29, 77.16, 21.40.

**HRMS m/z (EI-TOF):** calculated for C<sub>18</sub>H<sub>12</sub>O<sub>2</sub> [M]<sup>+</sup> 260.0837, found 260.0840.

### 3-Chloro-5H-dibenzo[*c,f*]chromen-5-one (3ka)

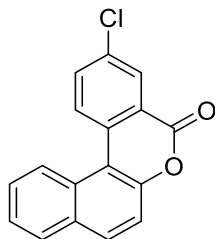

The preparation was according to the **general procedure 2** on 0.3 mmol scale, and obtained an isolated yield of 37% (31 mg) as yellow solid after column chromatography (petroleum ether: EtOAc = 8:1) on silica gel.

**M.P.:** 140-143°C.

**<sup>1</sup>H NMR (400 MHz, CDCl<sub>3</sub>)** δ 8.68 (d, *J* = 8.6 Hz, 1H), 8.60 (d, *J* = 8.8 Hz, 1H), 8.46 (d, *J* = 2.4 Hz, 1H), 7.95 (t, *J* = 7.8 Hz, 2H), 7.83 (dd, *J* = 8.8, 2.4 Hz, 1H), 7.69 (ddd, *J* = 8.5, 7.0, 1.3 Hz, 1H), 7.57 (t, *J* = 7.5 Hz, 1H), 7.48 (d, *J* = 8.9 Hz, 1H).

**<sup>13</sup>C NMR (101 MHz, CDCl<sub>3</sub>)** δ 160.30, 150.35, 134.66, 134.31, 133.93, 132.05, 131.77, 130.25, 129.60, 129.40, 128.19, 128.01, 125.74, 124.82, 123.77, 117.62, 112.00, 77.16.

**HRMS m/z (EI-TOF):** calculated for C<sub>17</sub>H<sub>9</sub>ClO<sub>2</sub> [M]<sup>+</sup> 280.0291, found 280.0290.

### 8-Chloro-6H-dibenzo[*c,h*]chromen-6-one (3kb)

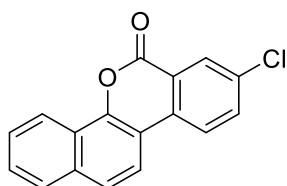

The preparation was according to the **general procedure 2** on 0.3 mmol scale, and obtained an isolated yield of 45% (37 mg) as yellow solid after column chromatography (petroleum ether: EtOAc = 8:1) on silica gel.

**M.P.:** 142-145°C.

**<sup>1</sup>H NMR (400 MHz, CDCl<sub>3</sub>)** δ 8.58 – 8.53 (m, 1H), 8.42 (d, *J* = 2.3 Hz, 1H), 8.12 (d, *J* = 8.6 Hz, 1H), 8.00 (d, *J* = 8.8 Hz, 1H), 7.88 (dd, *J* = 6.7, 2.4 Hz, 1H), 7.82 – 7.76 (m, 2H), 7.66 – 7.60 (m, 2H).

**<sup>13</sup>C NMR (101 MHz, CDCl<sub>3</sub>)** δ 160.27, 147.31, 135.41, 134.82, 134.48, 133.98, 130.24, 130.20, 128.28, 127.85, 127.48, 124.96, 123.88, 122.52, 122.42, 119.04, 112.44, 77.16.

**HRMS m/z (EI-TOF):** calculated for C<sub>17</sub>H<sub>9</sub>ClO<sub>2</sub> [M]<sup>+</sup> 280.0291, found 280.0295.

### 3-Bromo-5*H*-dibenzo[*c,f*]chromen-5-one (3la)

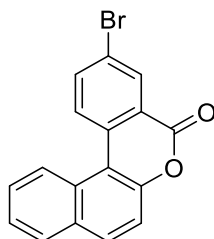

The preparation was according to the **general procedure 2** on 0.3 mmol scale, and obtained an isolated yield of 35% (34 mg) as yellow solid after column chromatography (petroleum ether: EtOAc = 8:1) on silica gel.

**M.P.:** 140-143°C.

**<sup>1</sup>H NMR (400 MHz, CDCl<sub>3</sub>)** δ 8.64 (d, *J* = 8.6 Hz, 1H), 8.59 (d, *J* = 2.2 Hz, 1H), 8.49 (d, *J* = 8.8 Hz, 1H), 7.94 (dt, *J* = 15.6, 5.6 Hz, 3H), 7.67 (ddd, *J* = 8.5, 6.9, 1.3 Hz, 1H), 7.59 – 7.53 (m, 1H), 7.45 (d, *J* = 8.9 Hz, 1H).

**<sup>13</sup>C NMR (101 MHz, CDCl<sub>3</sub>)** δ 160.15, 150.40, 137.48, 134.30, 133.31, 132.13, 131.78, 129.61, 129.37, 128.21, 128.08, 125.75, 124.81, 123.90, 122.08, 117.63, 112.04, 77.16.

**HRMS m/z (EI-TOF):** calculated for C<sub>17</sub>H<sub>9</sub>BrO<sub>2</sub> [M]<sup>+</sup> 323.9786, found 323.9791.

### 4-Fluoro-5*H*-dibenzo[*c,f*]chromen-5-one (3ma)

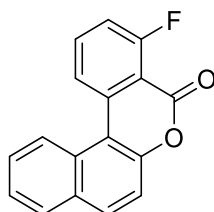

The preparation was according to the **general procedure 2** on 0.3 mmol scale, and obtained an isolated yield of 50% (40 mg) as yellow solid after column chromatography (petroleum ether: EtOAc = 8:1) on silica gel.

**M.P.:** 147-150°C.

**<sup>1</sup>H NMR (400 MHz, CDCl<sub>3</sub>)** δ 8.68 (d, *J* = 8.6 Hz, 1H), 8.40 (d, *J* = 8.3 Hz, 1H), 7.94 (dd, *J* = 8.5, 4.9 Hz, 2H), 7.84 (td, *J* = 8.3, 5.4 Hz, 1H), 7.70 – 7.63 (m, 1H), 7.56 (t, *J* = 7.5 Hz, 1H), 7.44 (d, *J* = 8.9 Hz, 1H), 7.31 (dd, *J* = 10.0, 8.6 Hz, 1H).

$^{13}\text{C}$  NMR (101 MHz,  $\text{CDCl}_3$ )  $\delta$  164.79, 162.13, 156.96, 156.91, 150.66, 137.98, 135.79(d,  $J_{\text{C-F}} = 10.1\text{Hz}$ ), 132.46, 130.63(d,  $J_{\text{C-F}} = 226.1\text{Hz}$ ), 129.55, 128.14, 125.69, 124.95, 122.50(d,  $J_{\text{C-F}} = 4.1\text{Hz}$ ), 117.41, 115.79(d,  $J_{\text{C-F}} = 21.2\text{Hz}$ ), 111.91(d,  $J_{\text{C-F}} = 22.1\text{Hz}$ ), 111.40(d,  $J_{\text{C-F}} = 10.0\text{Hz}$ ), 77.16.

$^{19}\text{F}$  NMR (377 MHz,  $\text{CDCl}_3$ )  $\delta$  -106.47.

HRMS  $m/z$  (EI-TOF): calculated for  $\text{C}_{17}\text{H}_9\text{FO}_2$   $[\text{M}]^+$  264.0587, found 264.0590.

## Part 5. Mechanism study

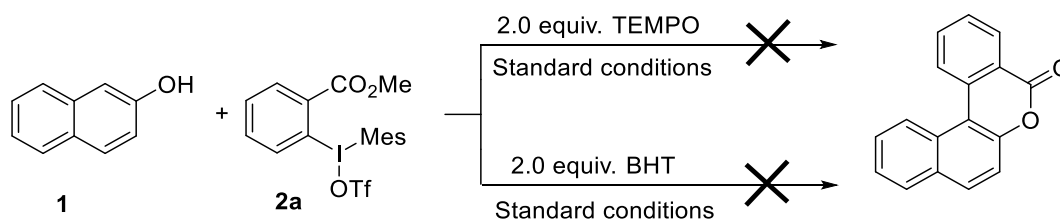

To an oven-dried Schlenk tube was added 2-Naphthol **1** (0.3 mmol, 1.0 equiv) *ortho*-ester-substituted diaryliodonium salt **2** (0.33 mmol, 1.1 equiv)  $\text{Cu}(\text{OAc})_2$  (0.03 mmol, 10% equiv) and DCE (2 mL). BHT or TEMPO (2.0 equiv) was added. The mixture was stirred at 80 °C in an oil bath until TLC indicated that the 2-naphthol was completely consumed. TEMPO = 2,2,6,6-tetramethylpiperidine-1-oxyl. BHT = butylated hydroxytoluene.

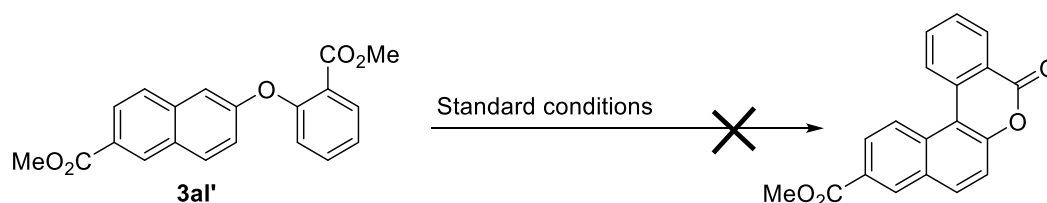

To an oven-dried Schlenk tube was added **3a'** (0.3 mmol, 1.0 equiv)  $\text{Cu}(\text{OAc})_2$  (0.03 mmol, 10% equiv) and DCE (2 mL). The mixture was stirred at 80 °C in an oil bath.

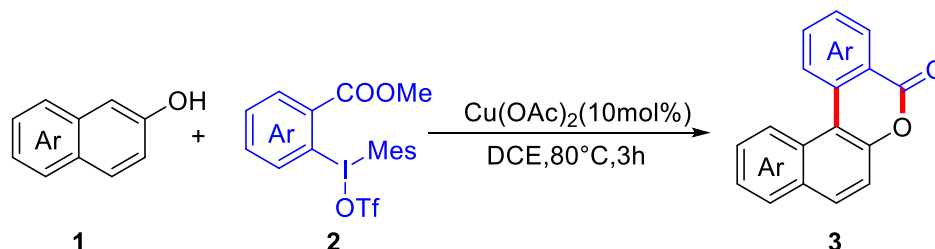

To an oven-dried Schlenk tube was added 2-naphthol **1** (0.3 mmol, 1.0 equiv.) *ortho*-ester-substituted diaryliodonium salt **2** (0.33 mmol, 1.1 equiv)  $\text{Cu}(\text{OAc})_2$  (0.03mmol, 10% equiv) and DCE (2 mL). The mixture was stirred at 80 °C in an oil bath. After 1 hours, a drop of the reaction mixture was delivered to LC-MS analysis.

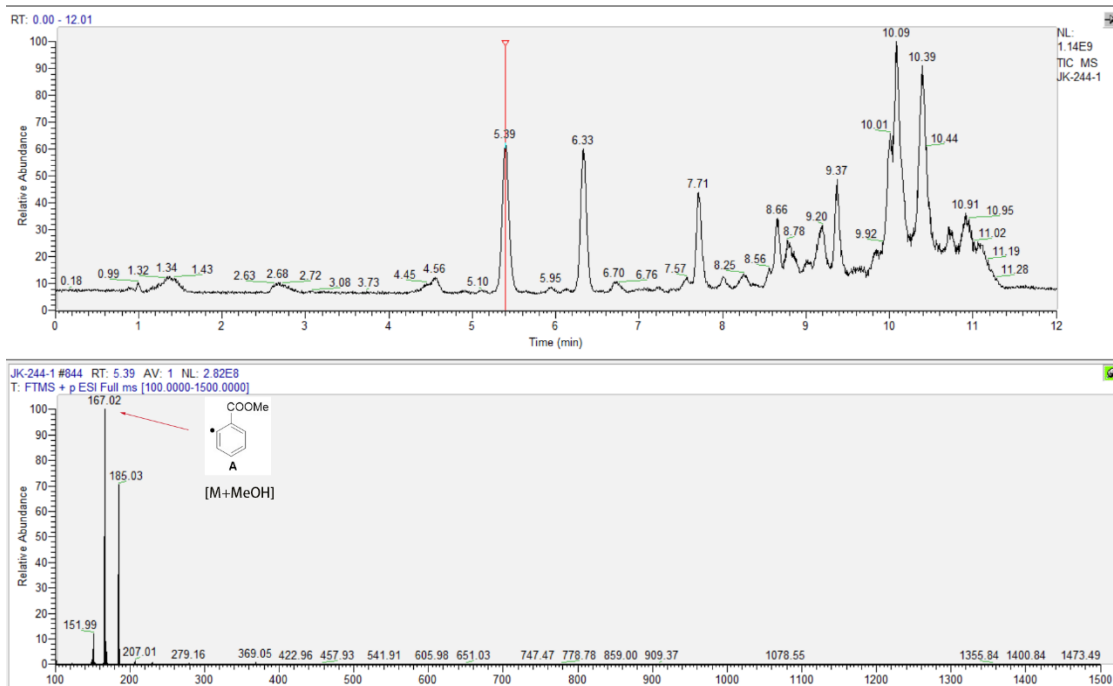

Figure S1. LC-MS spectra of reaction mixture

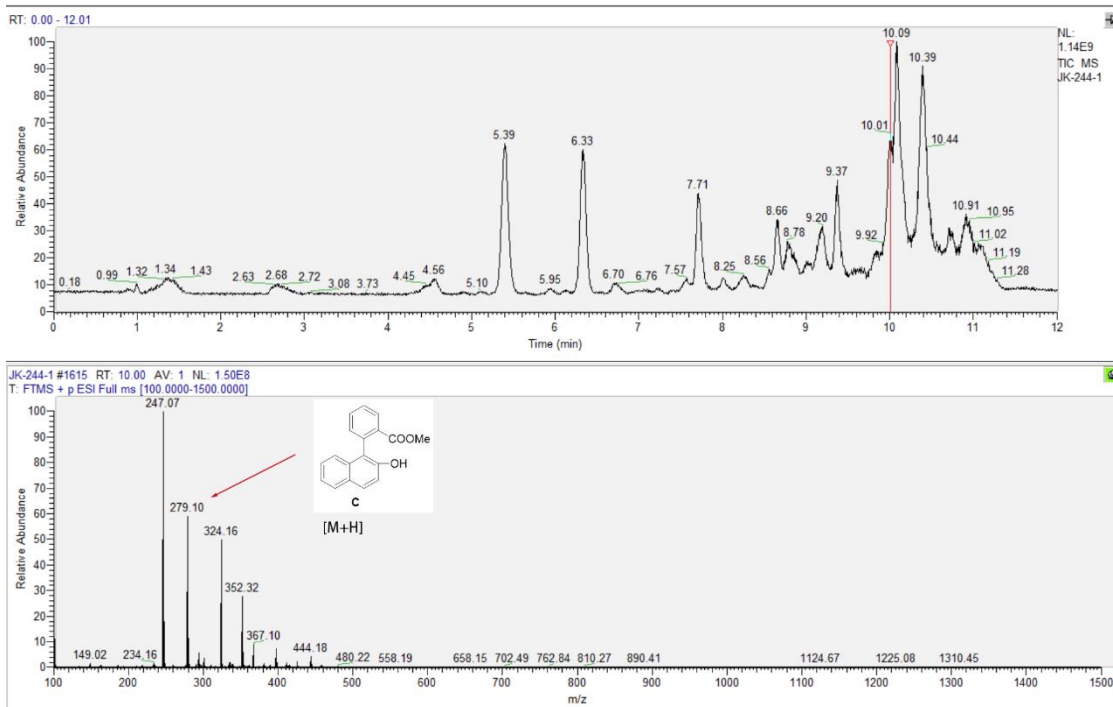

Figure S2. LC-MS spectra of reaction mixture

## Part 6. References

- [1] Yang, J.; Xu, X.; Qing, F. *J. Fluorine Chem.* **2015**, 180, 175-180.
- [2] Saravanan, P.; Anbarasan, P.; *Adv. Synth. Catal.* **2015**, 357, 3521-3528.
- [3] Beugelmans, R.; Bois-Choussy, M.; Chastanet, J.; *Heterocycl.* **1993**, 36, 2723-2732.

## Part 7. $^1\text{H}$ , $^{13}\text{C}$ , and $^{19}\text{F}$ NMR spectra of products

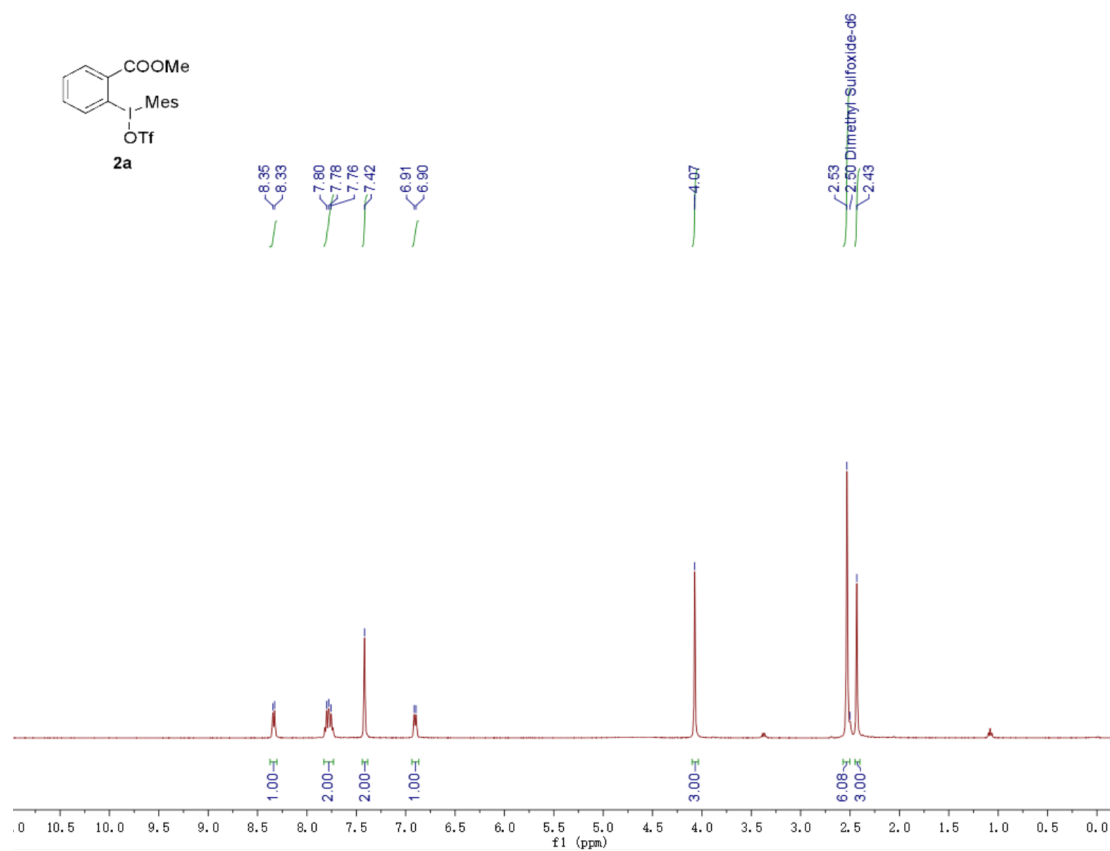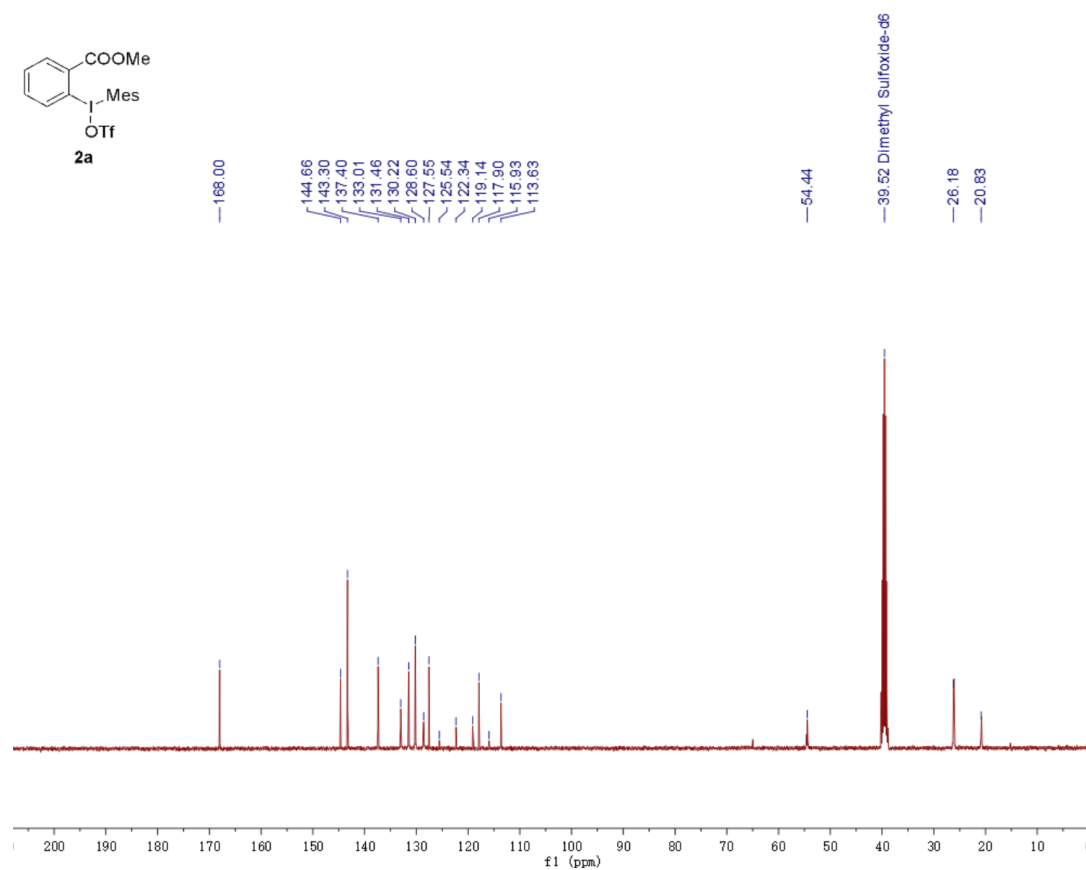



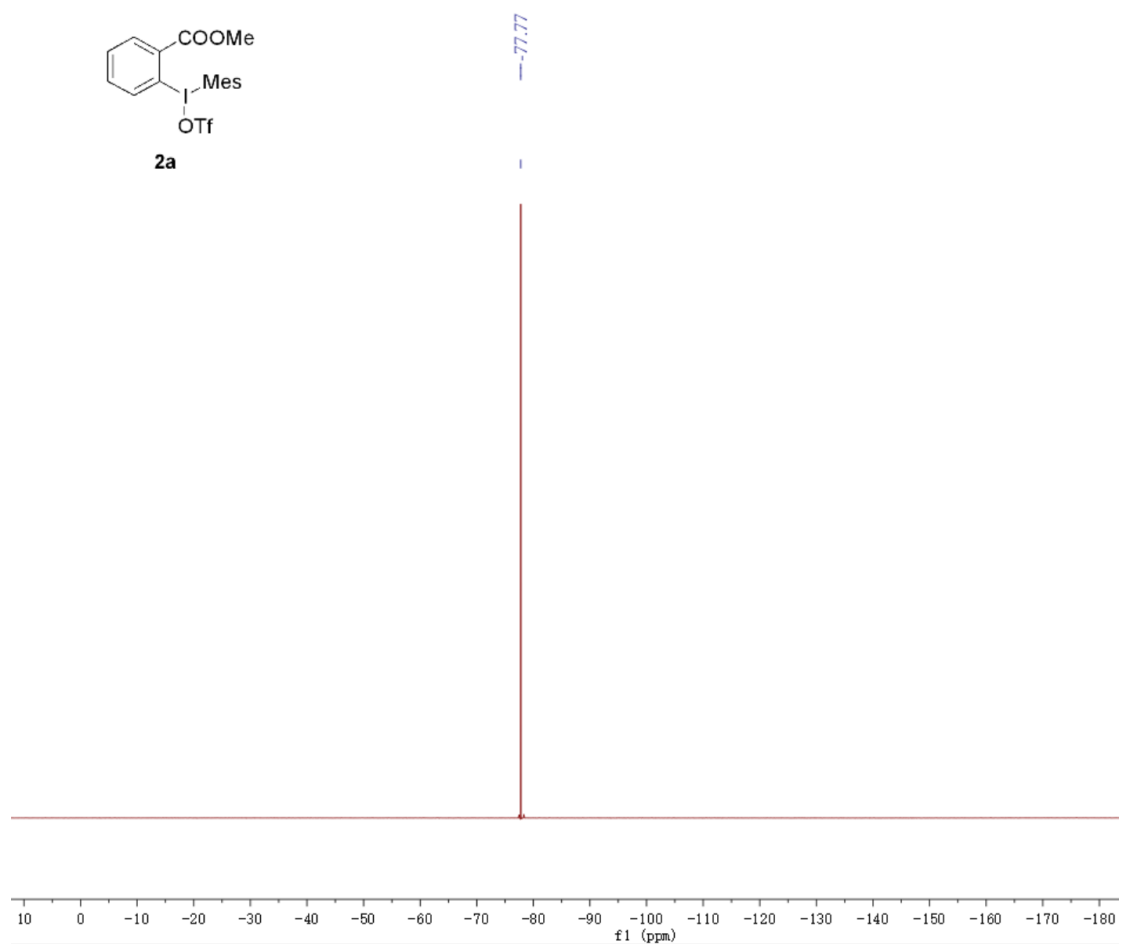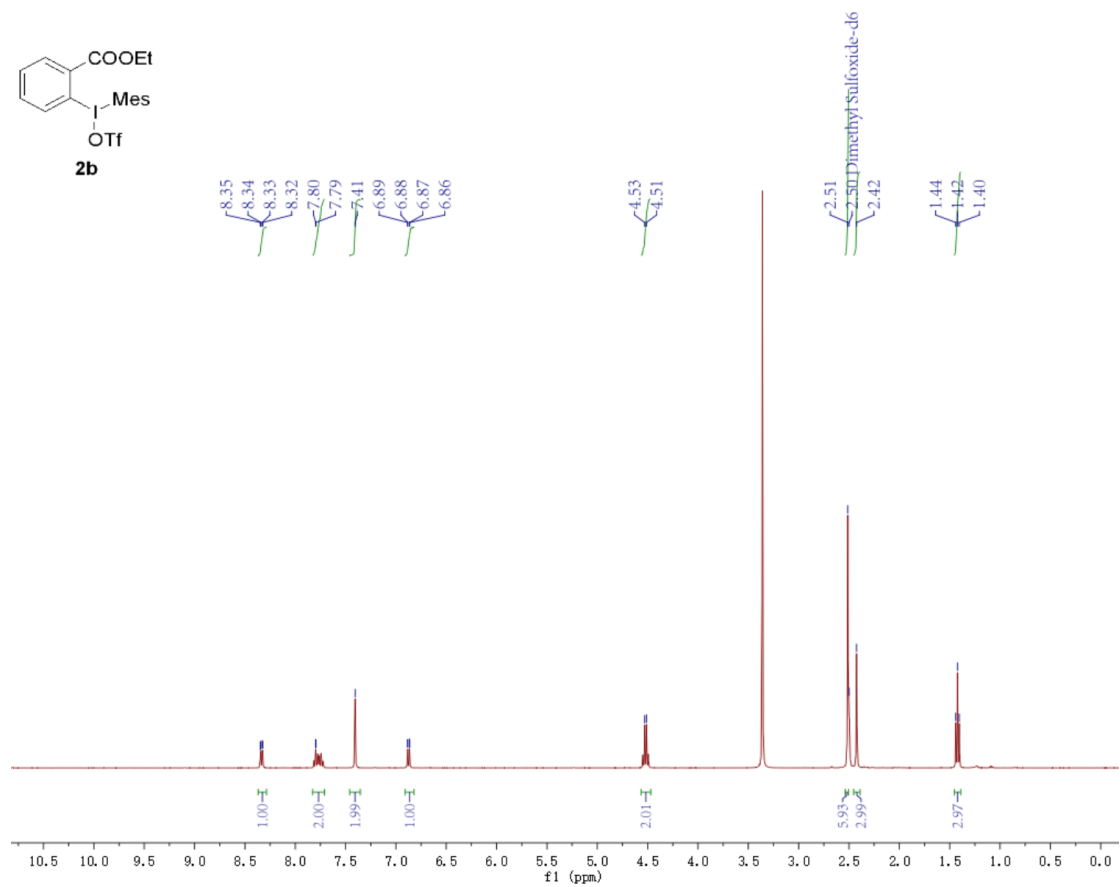

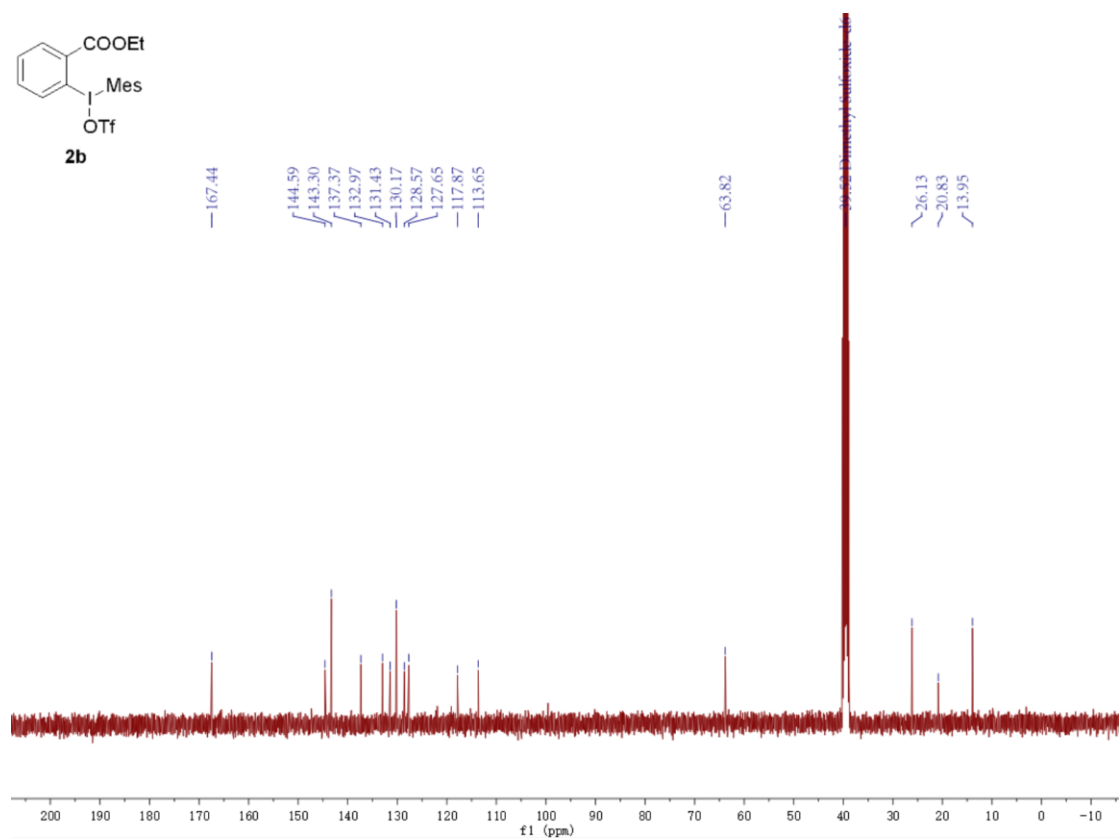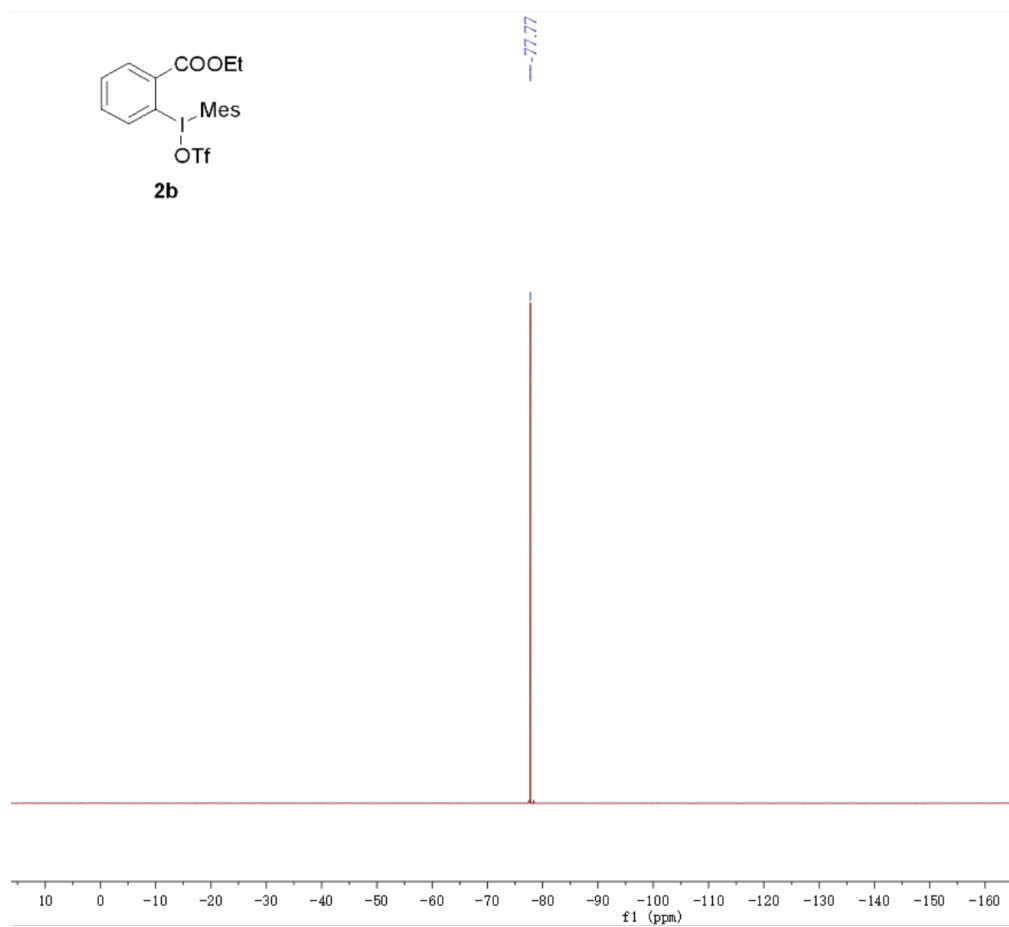

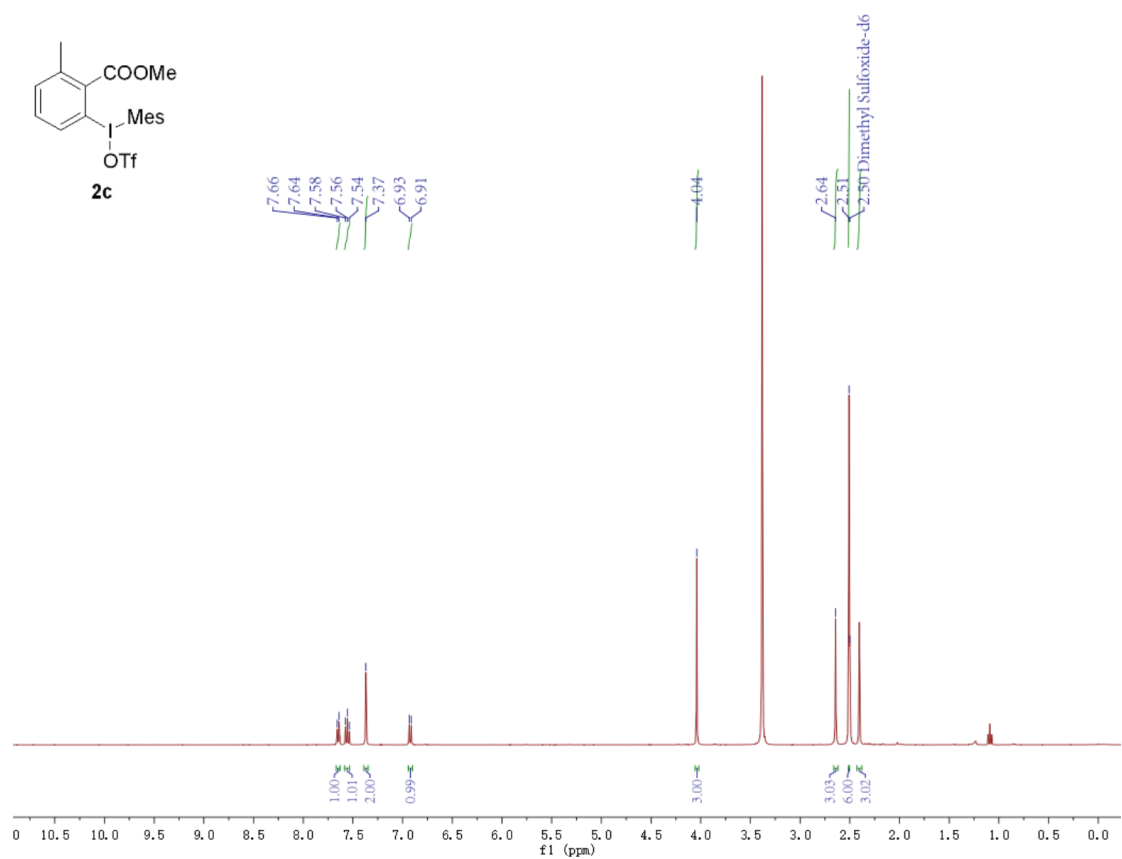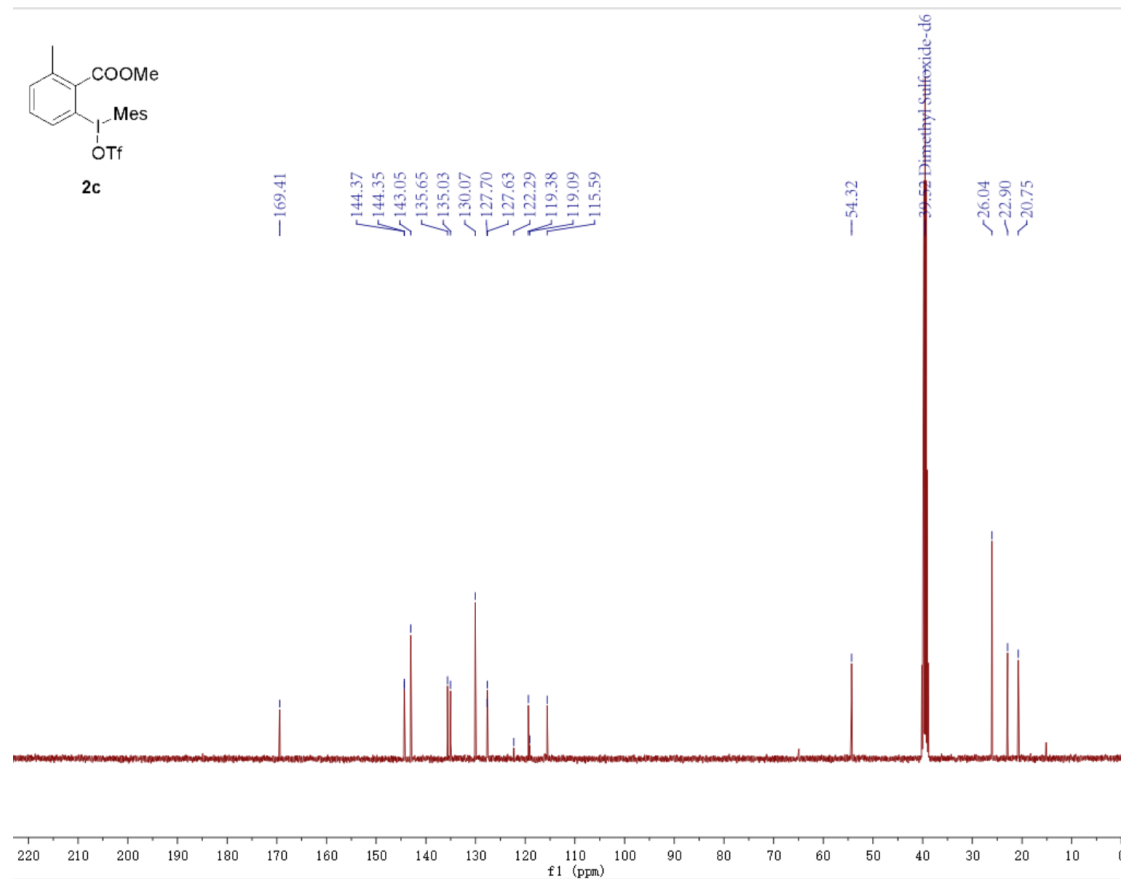

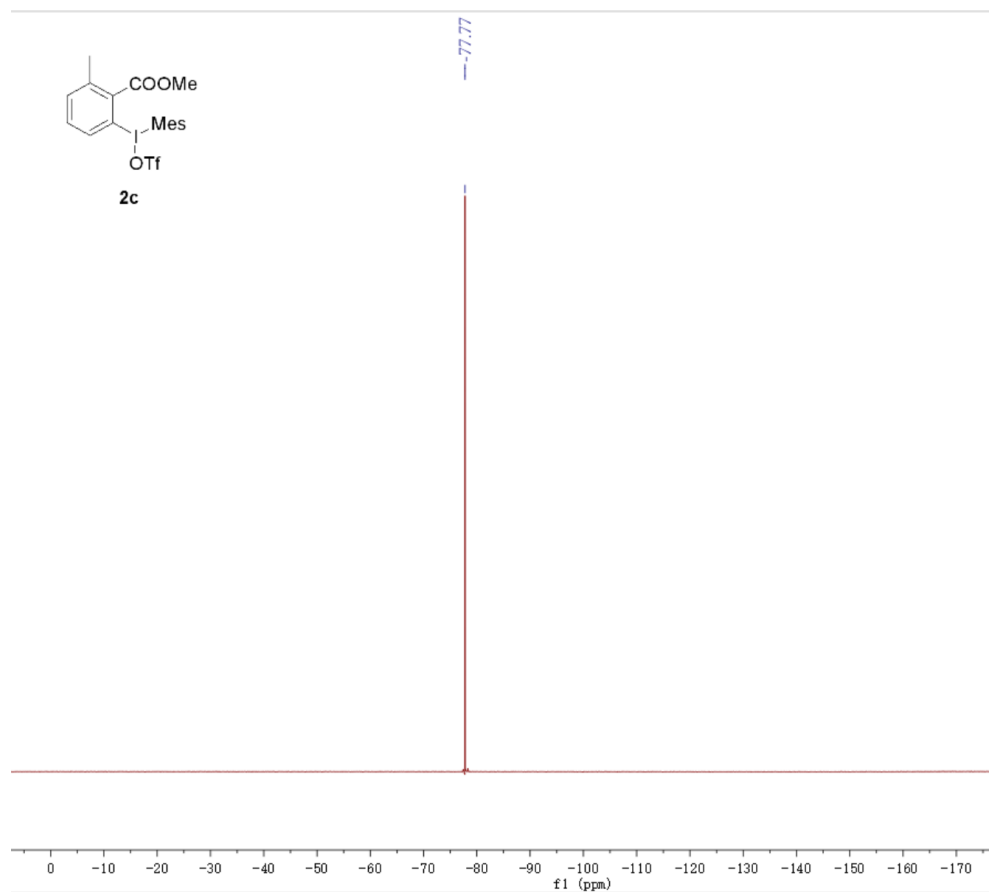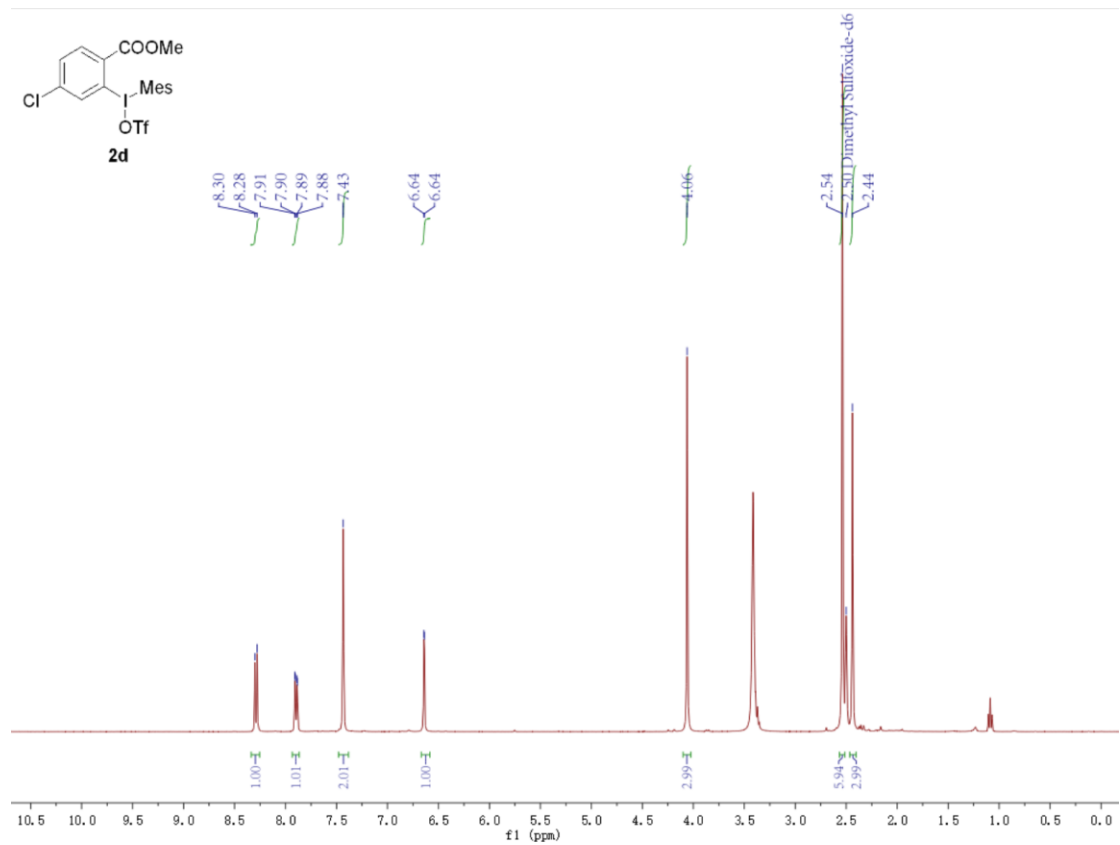

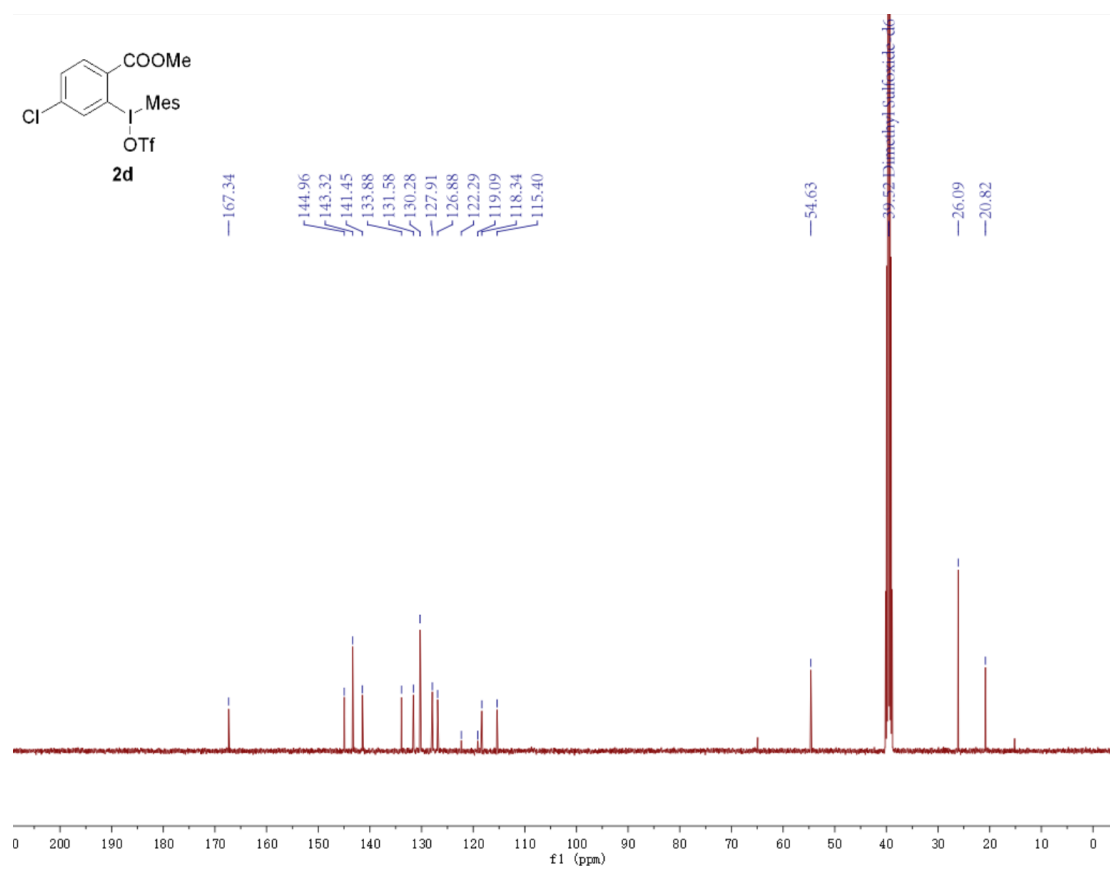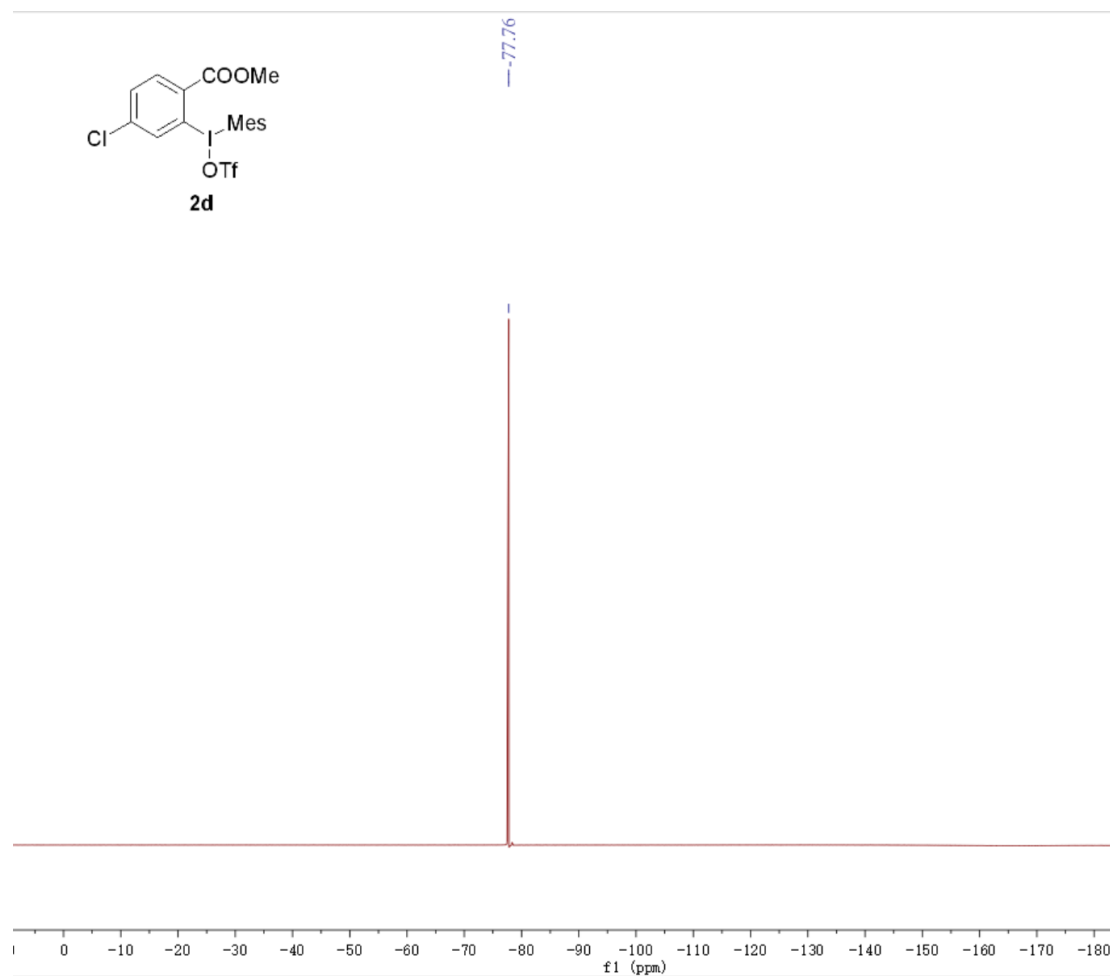

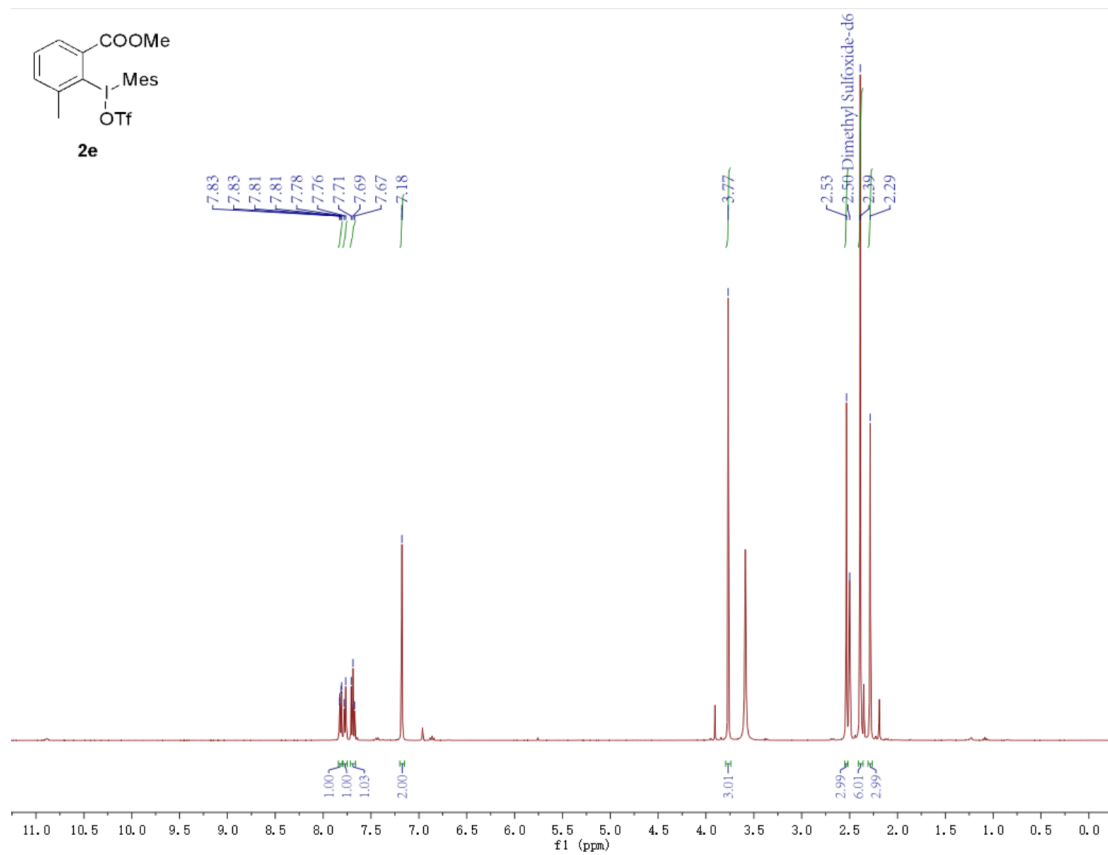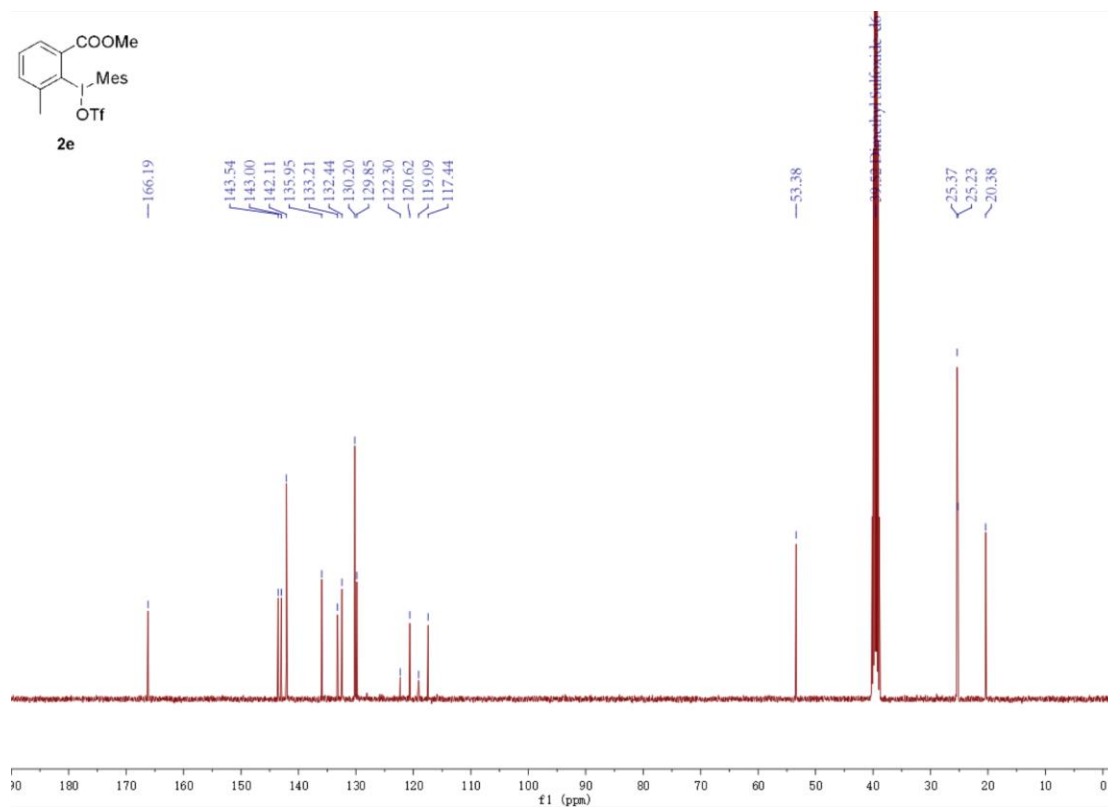

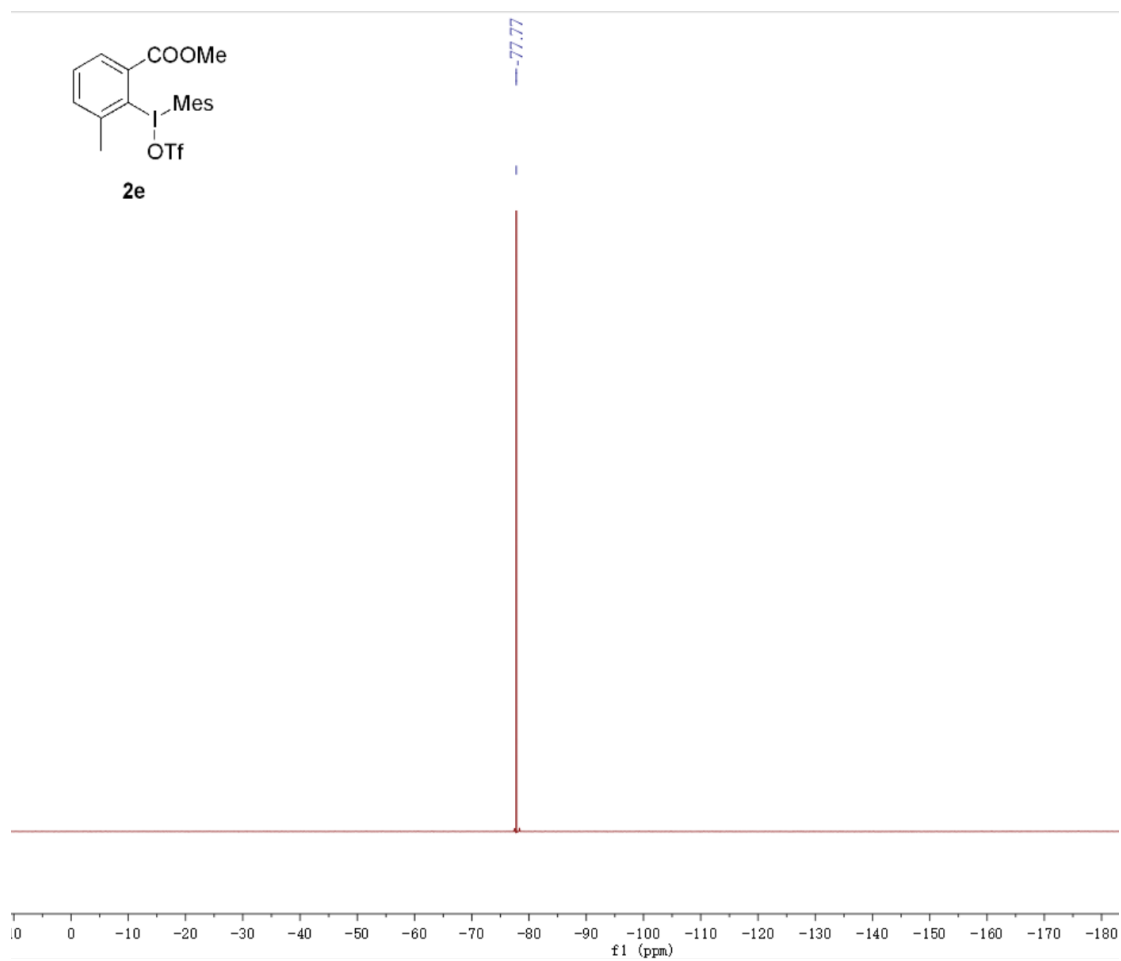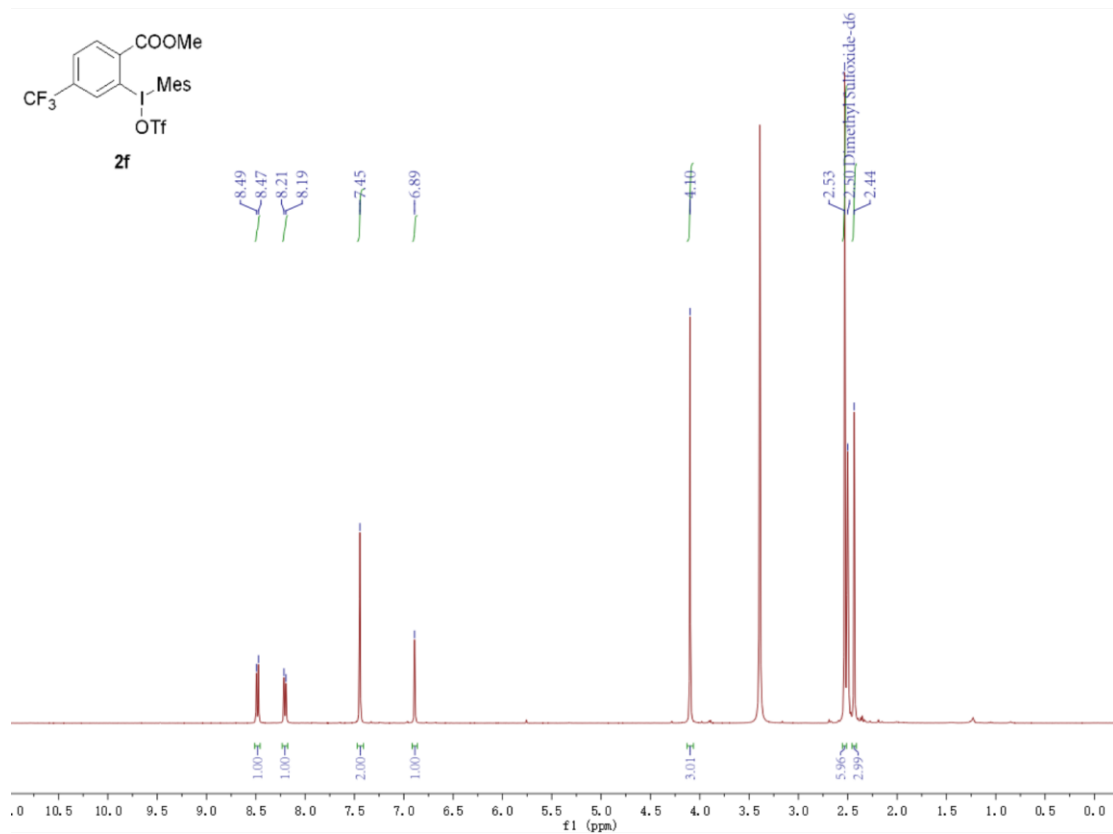

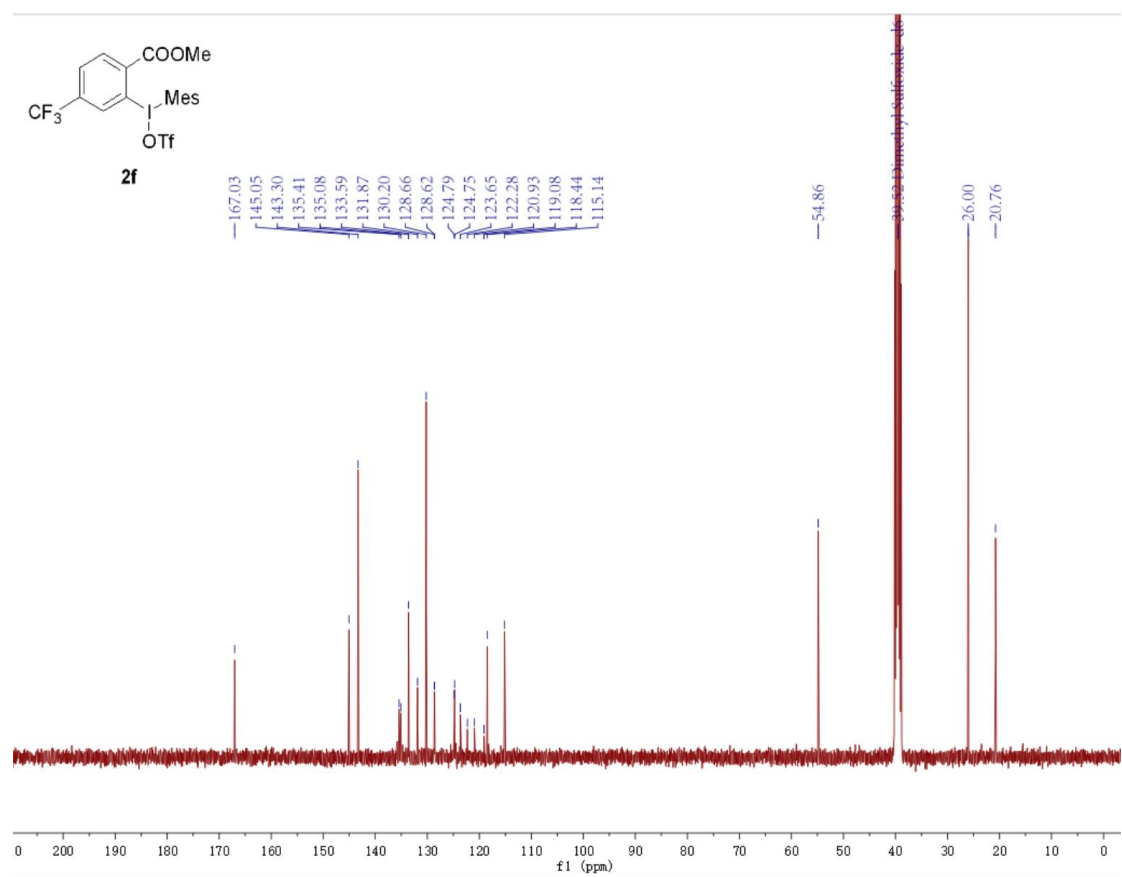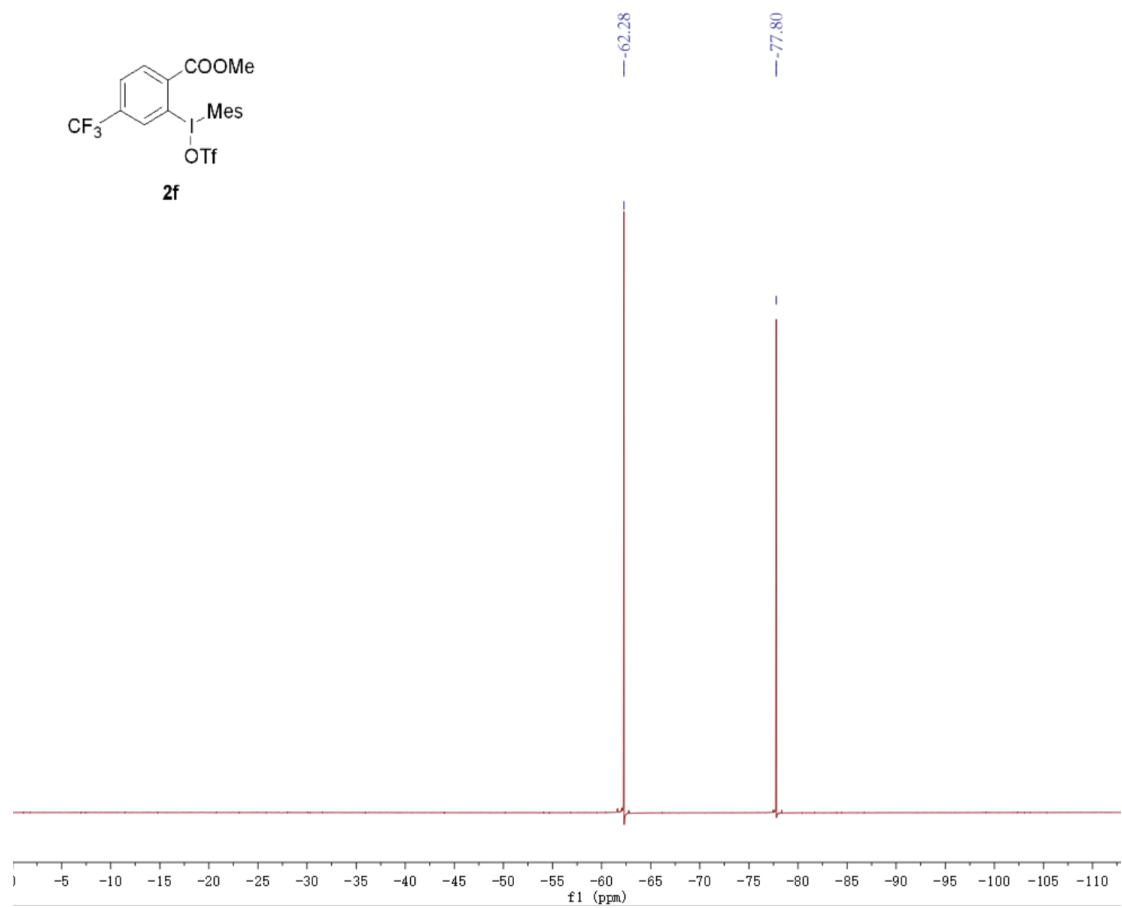



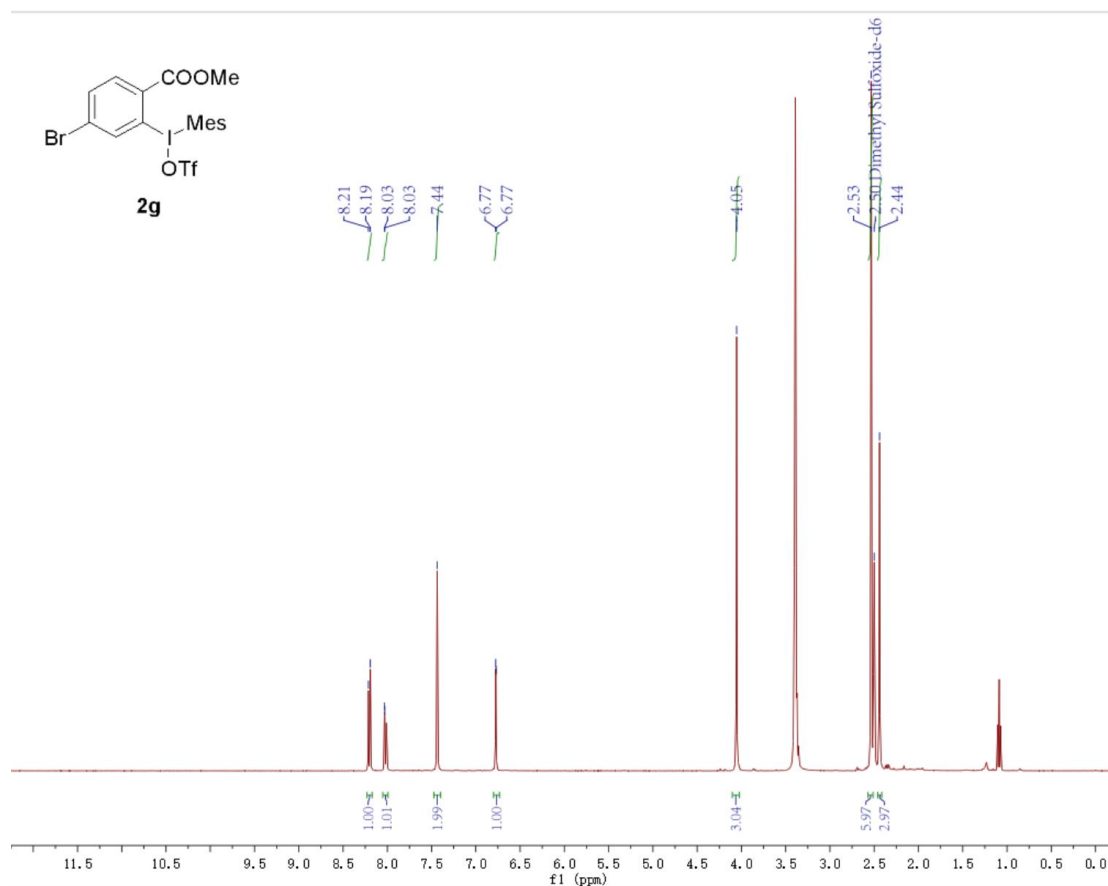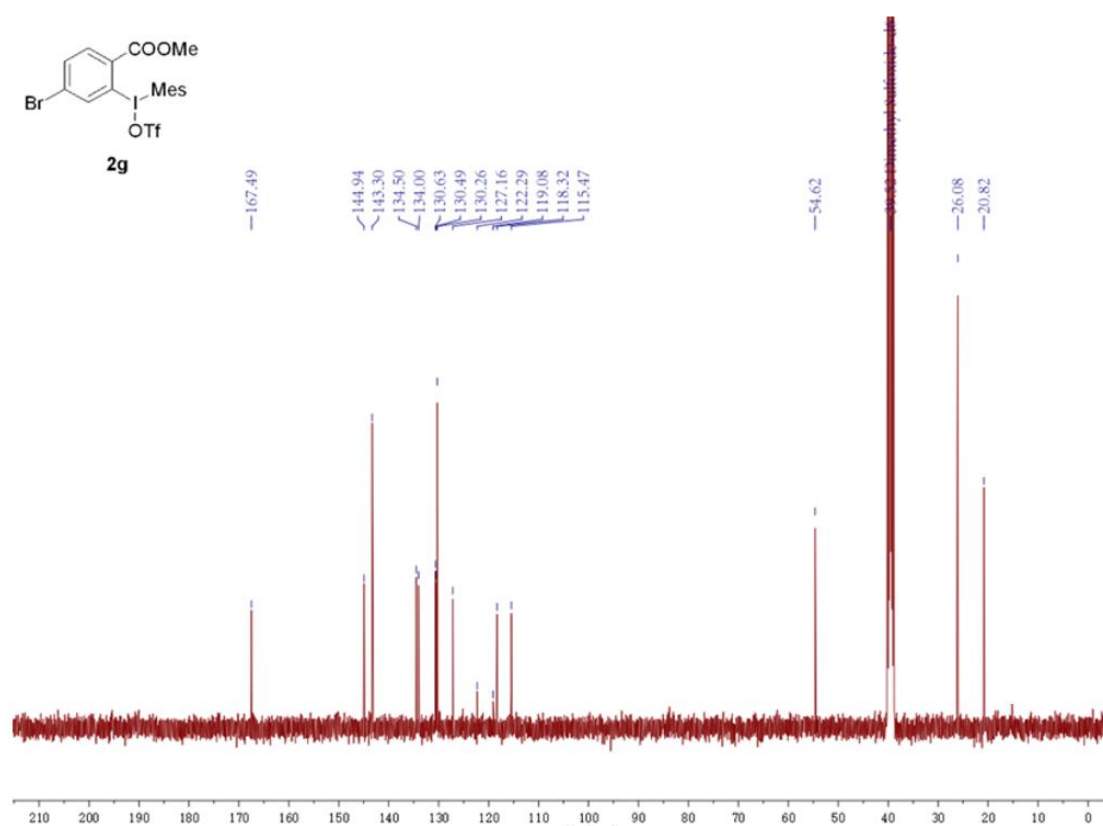

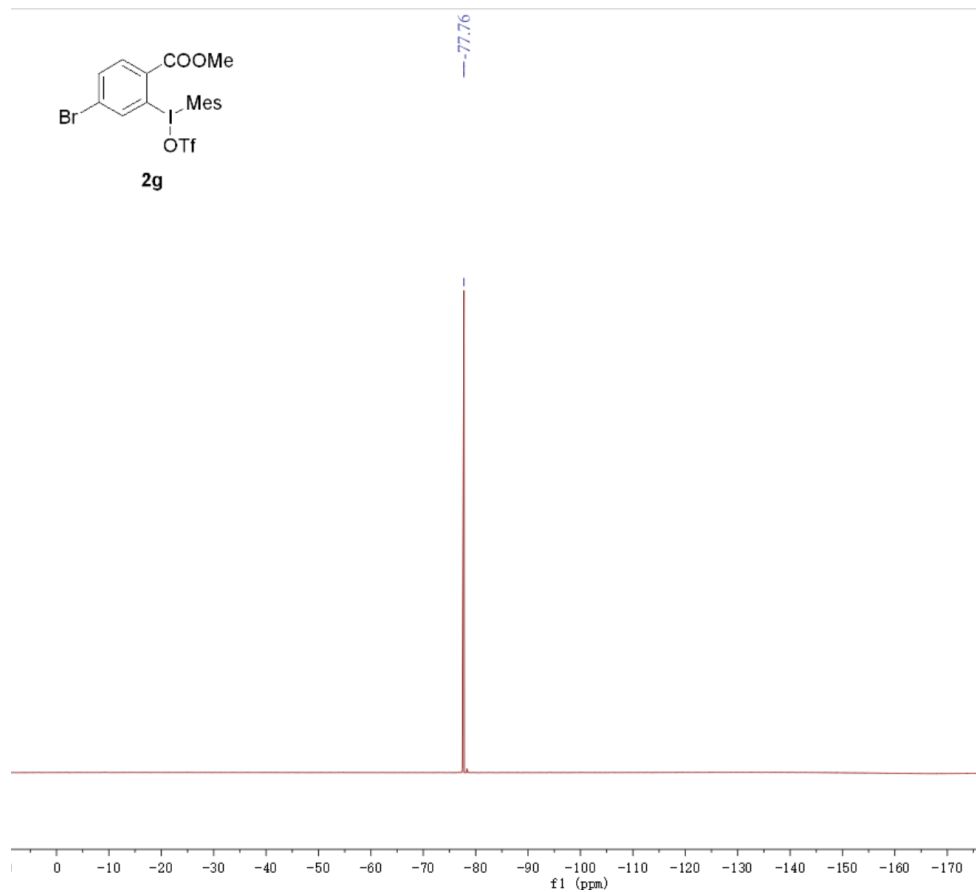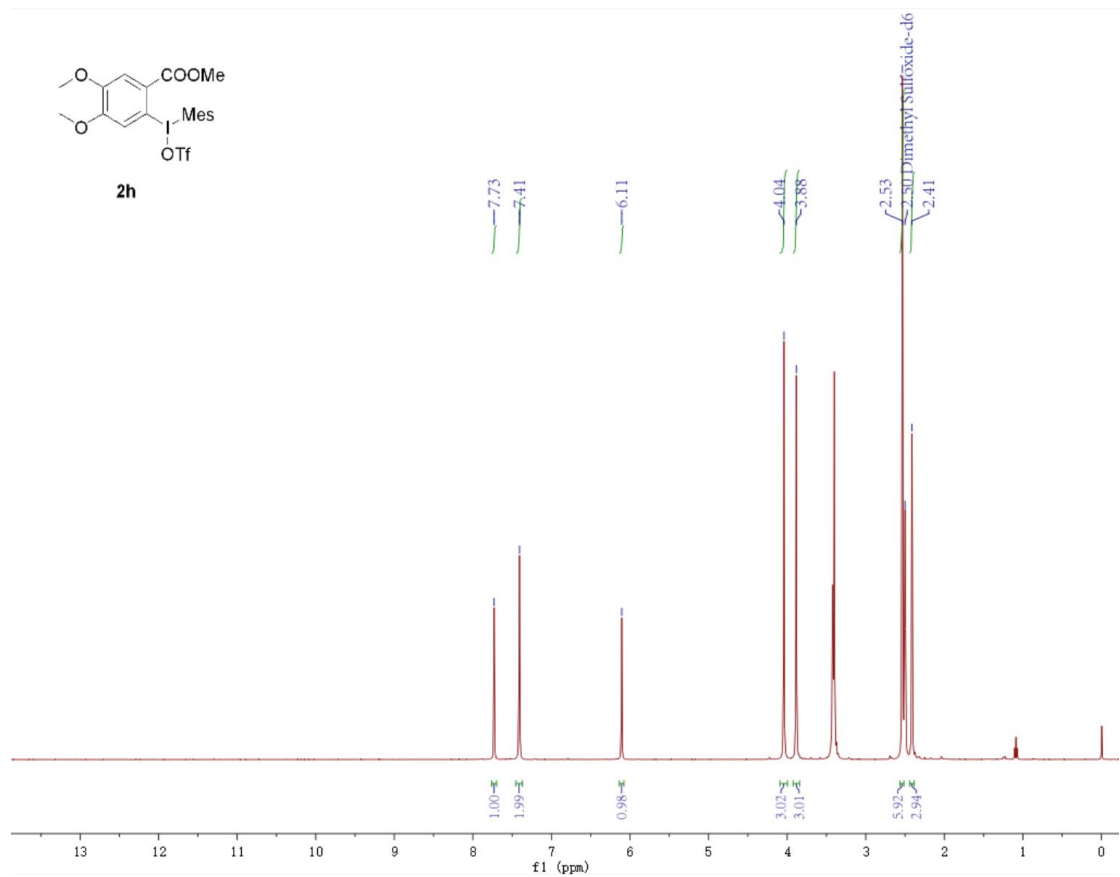

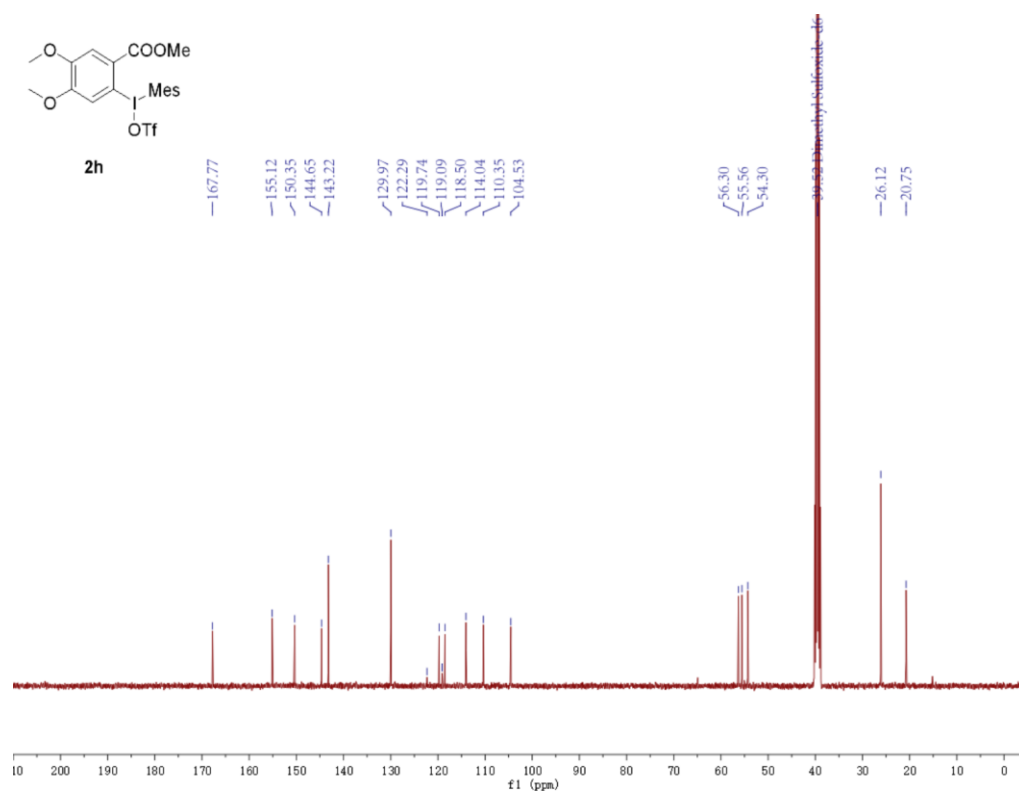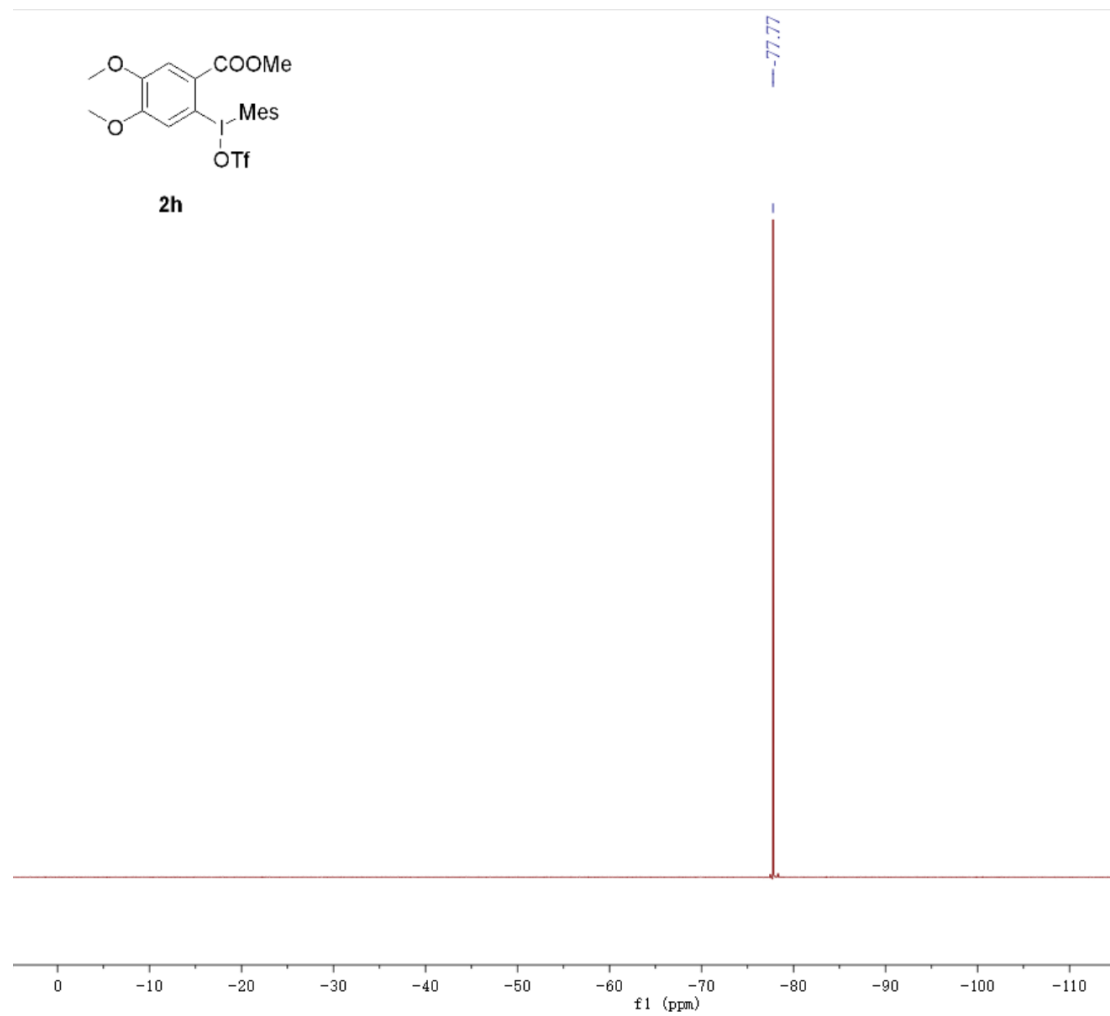

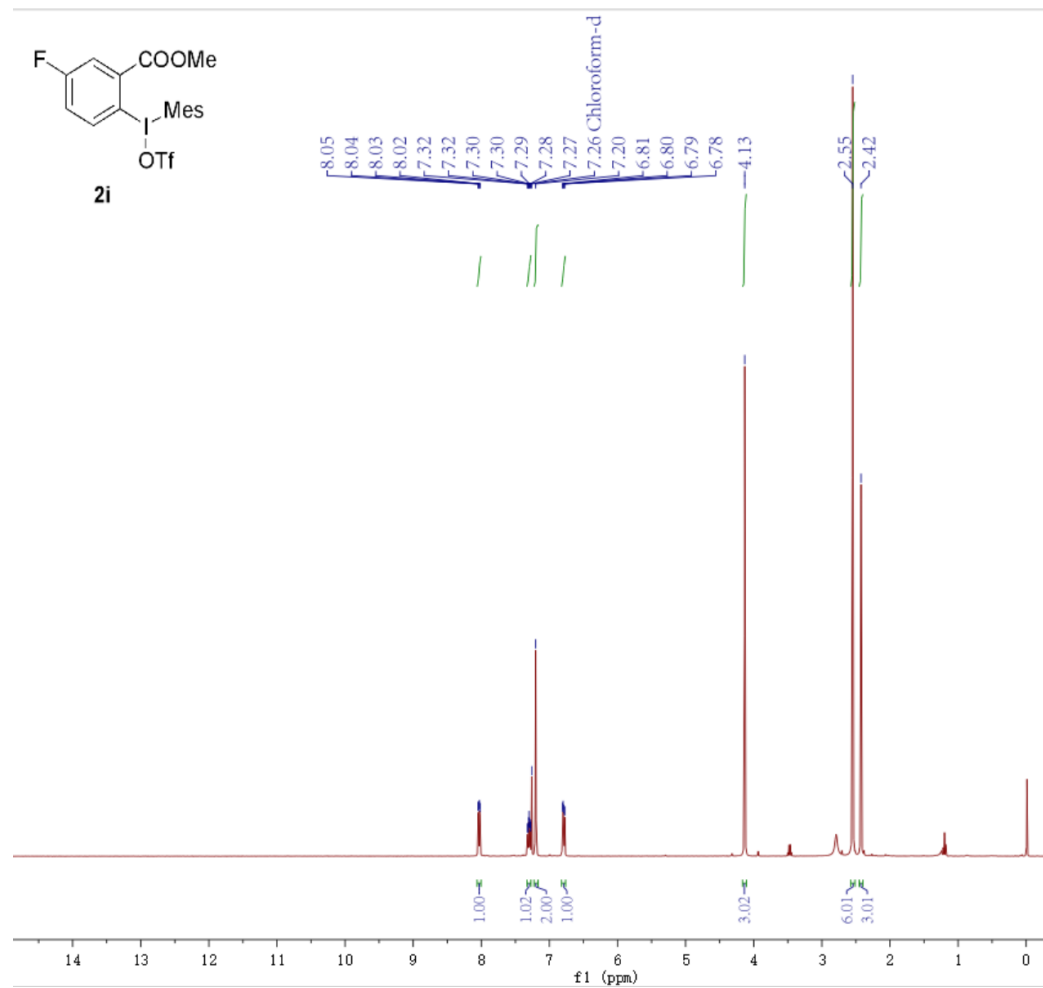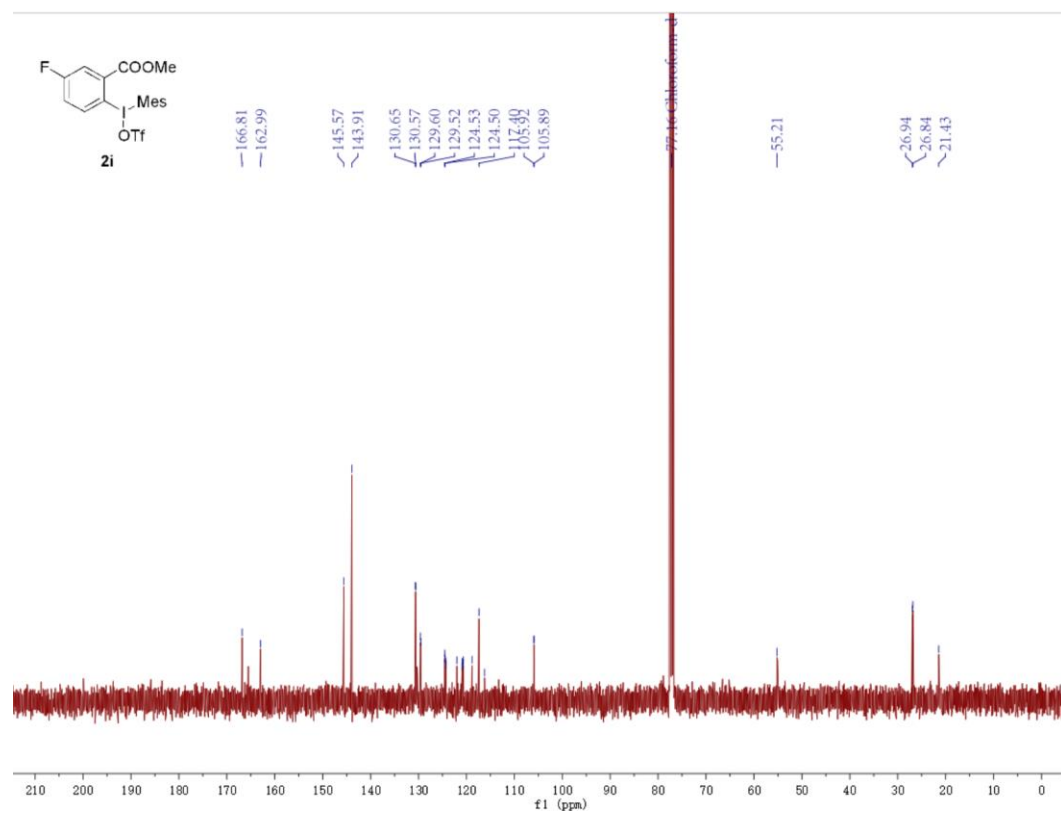

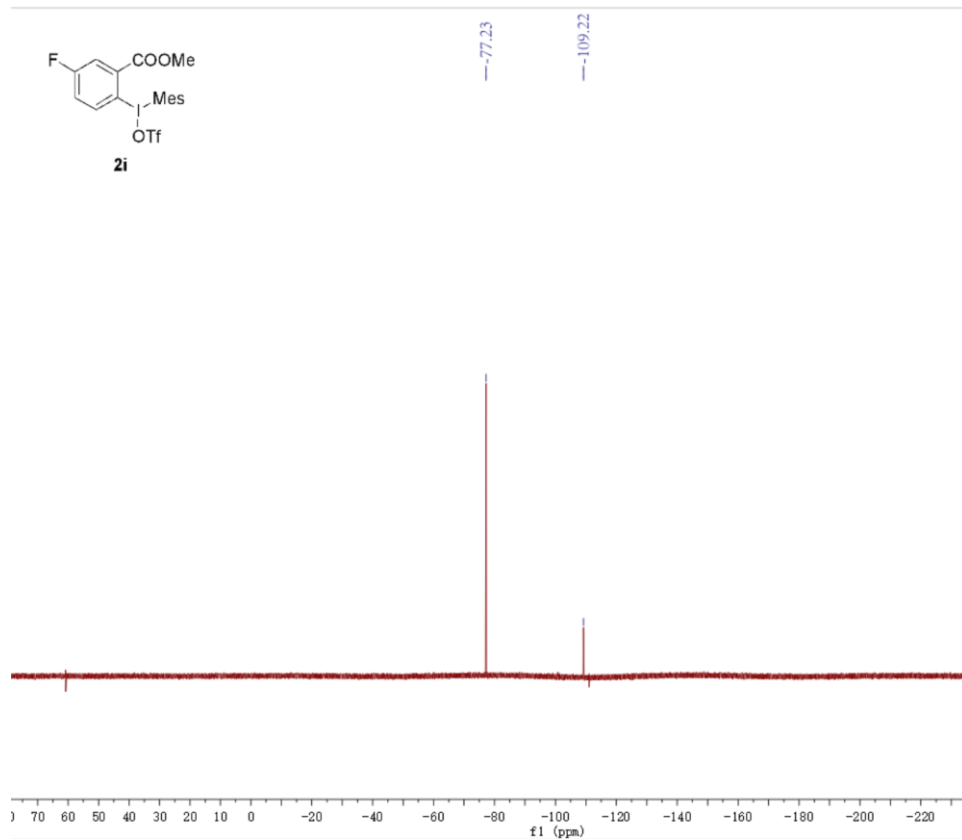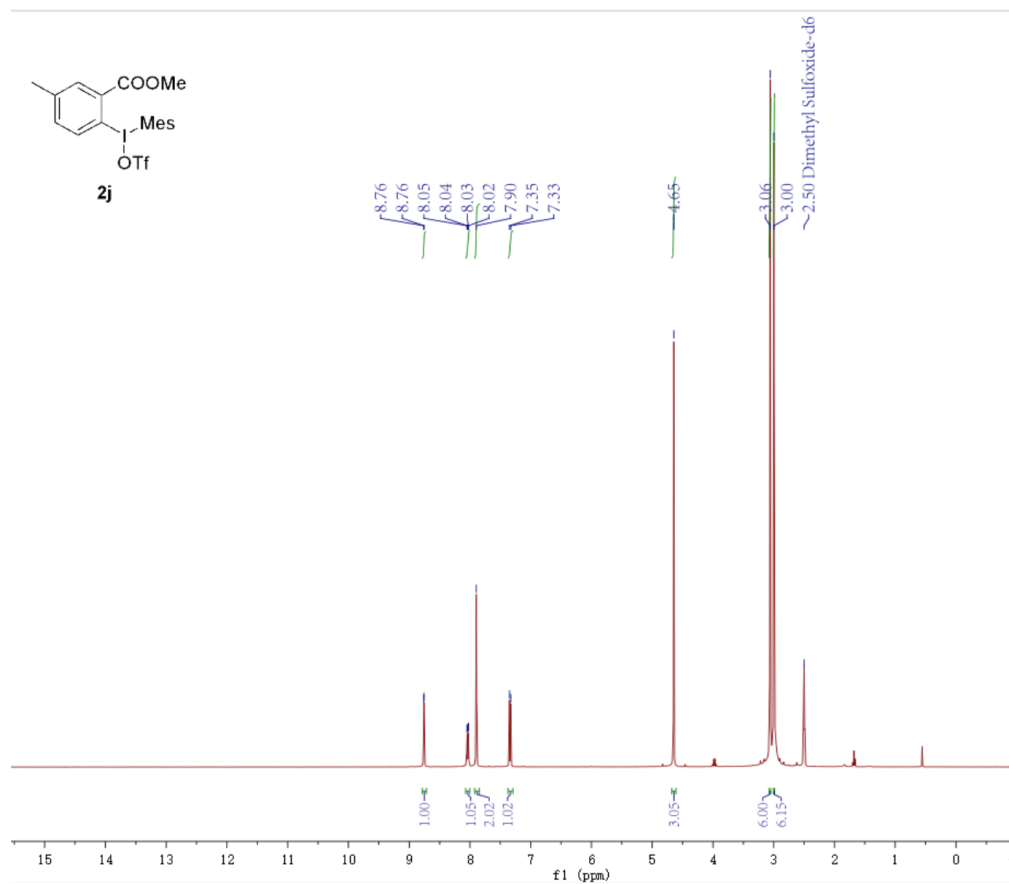

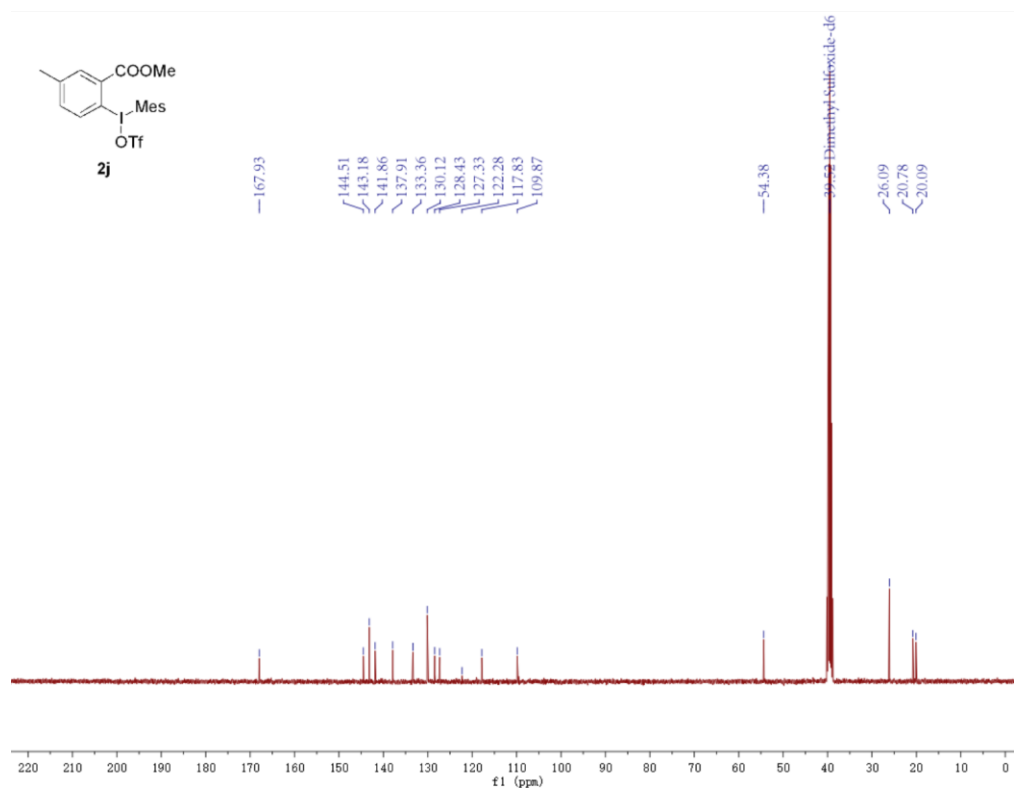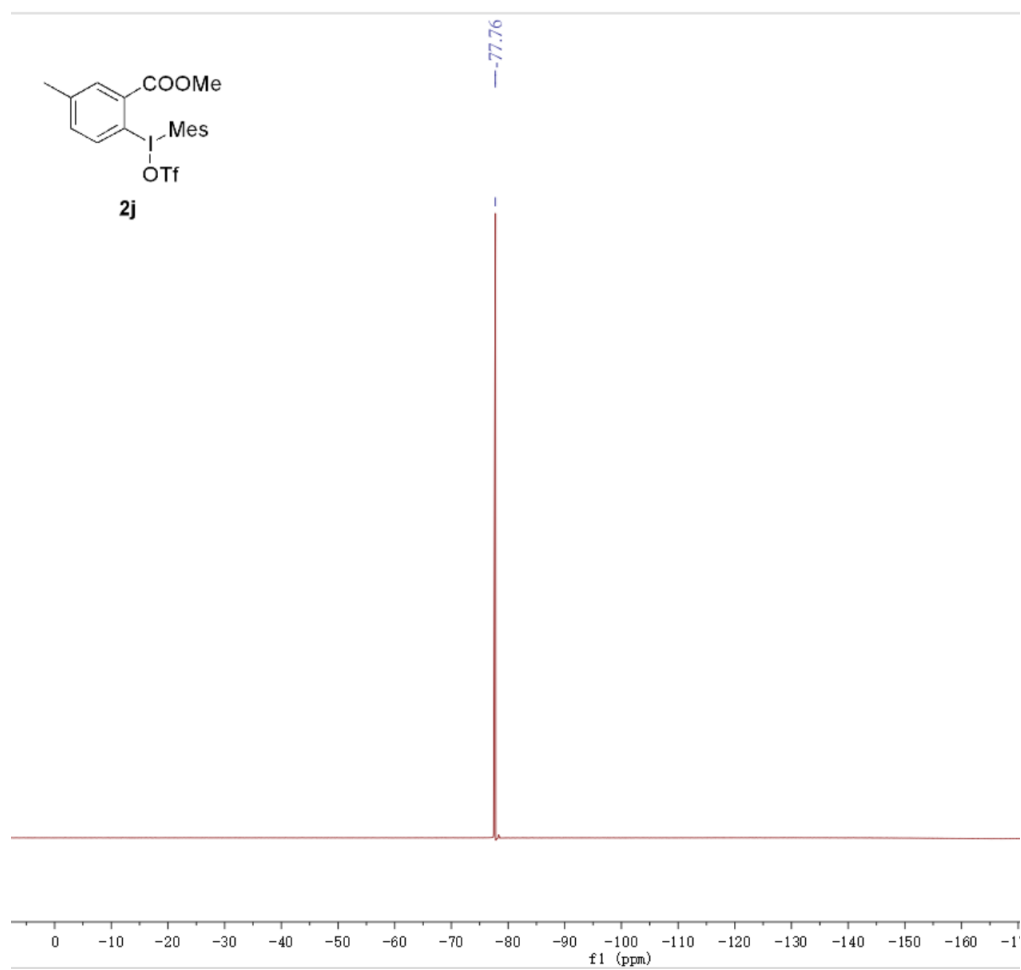

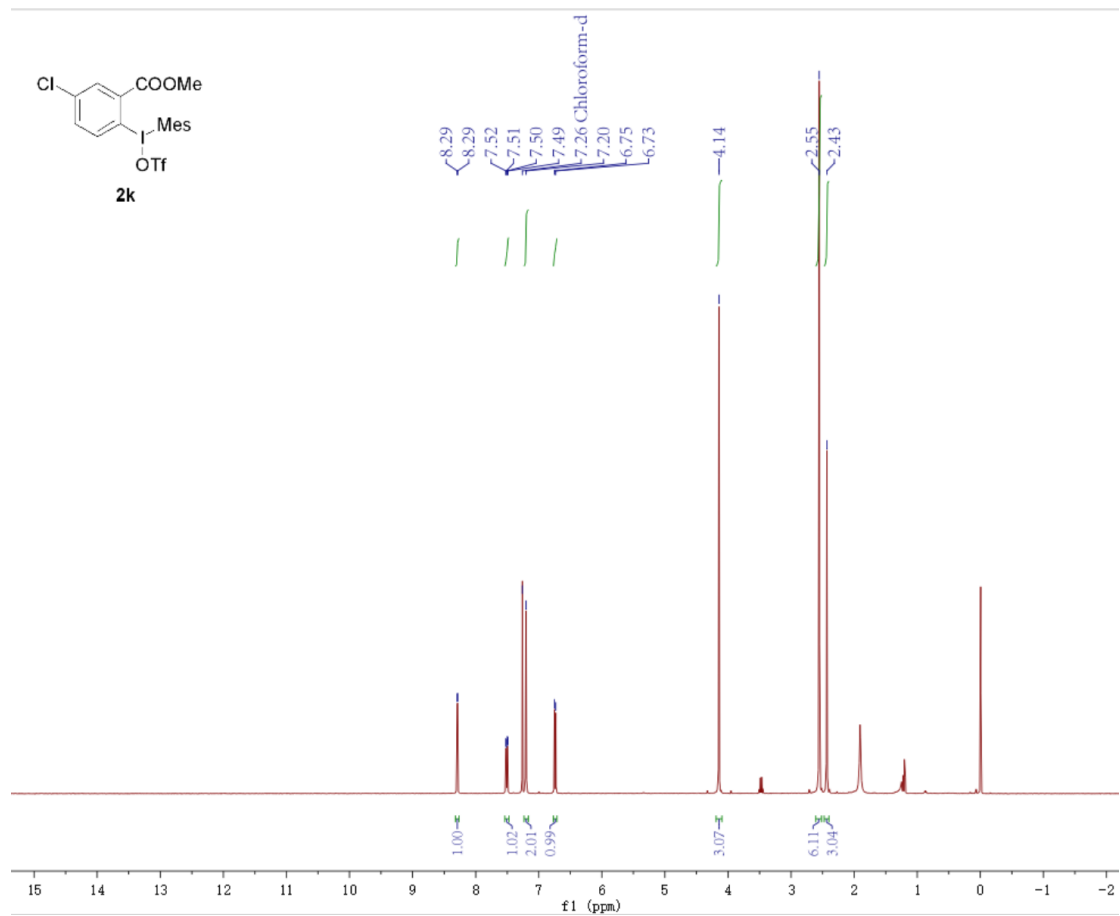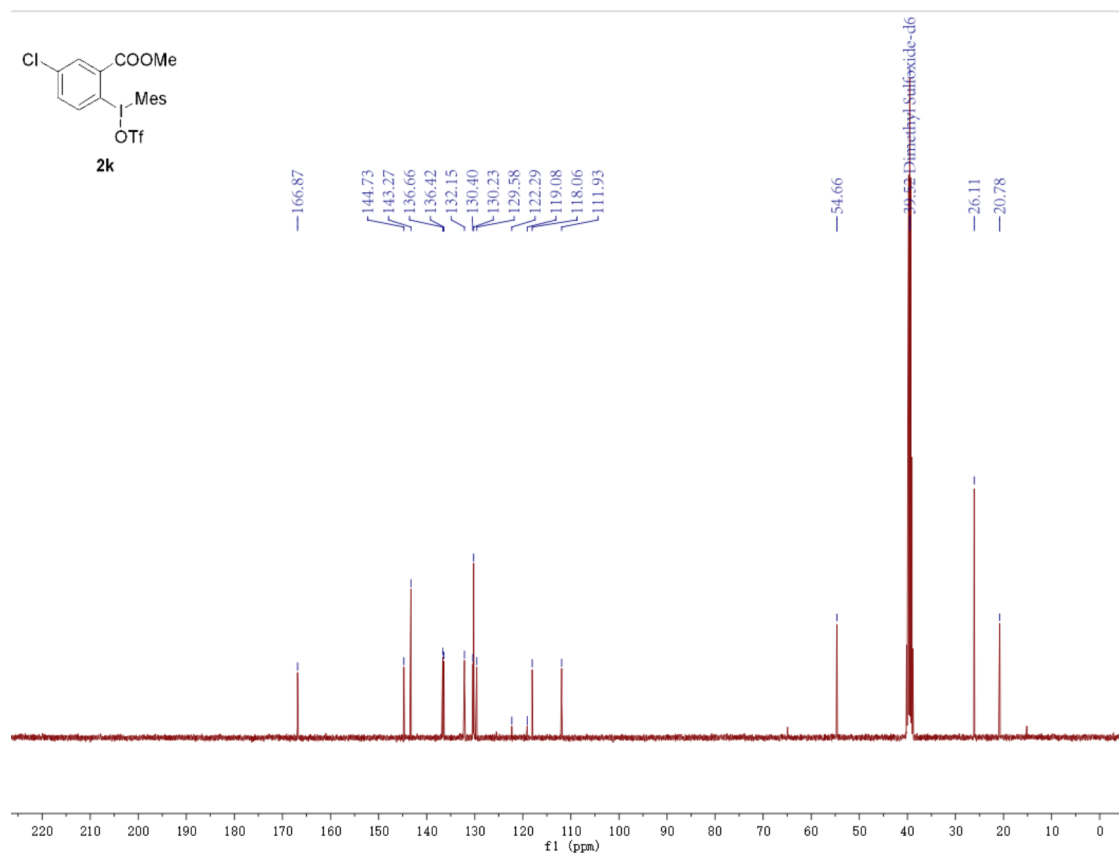

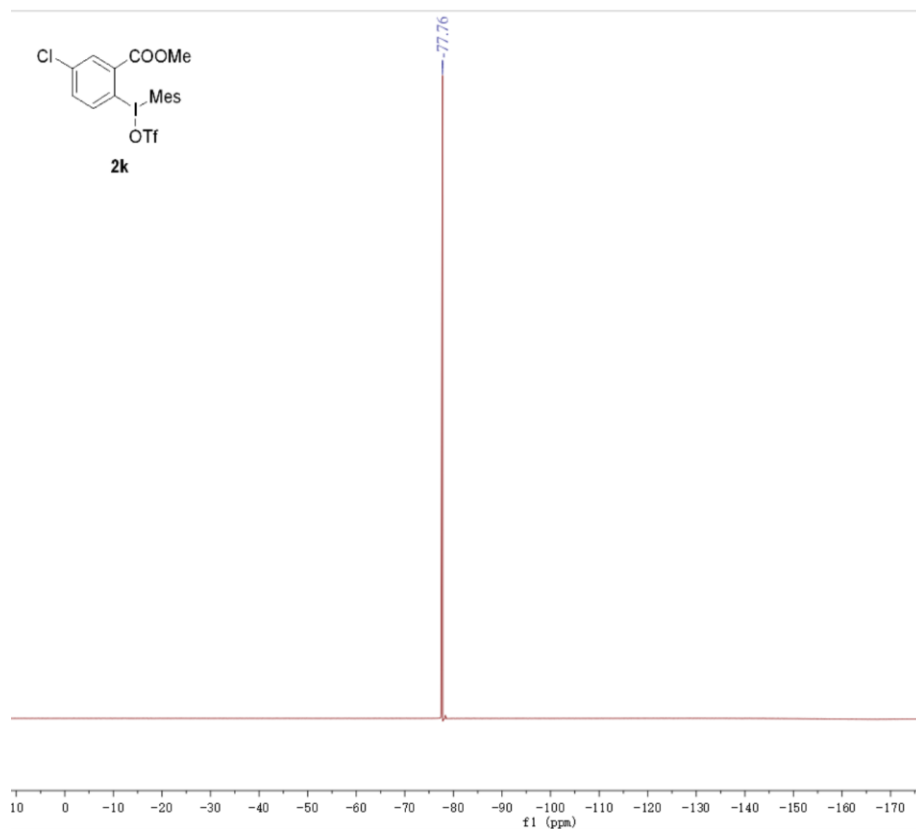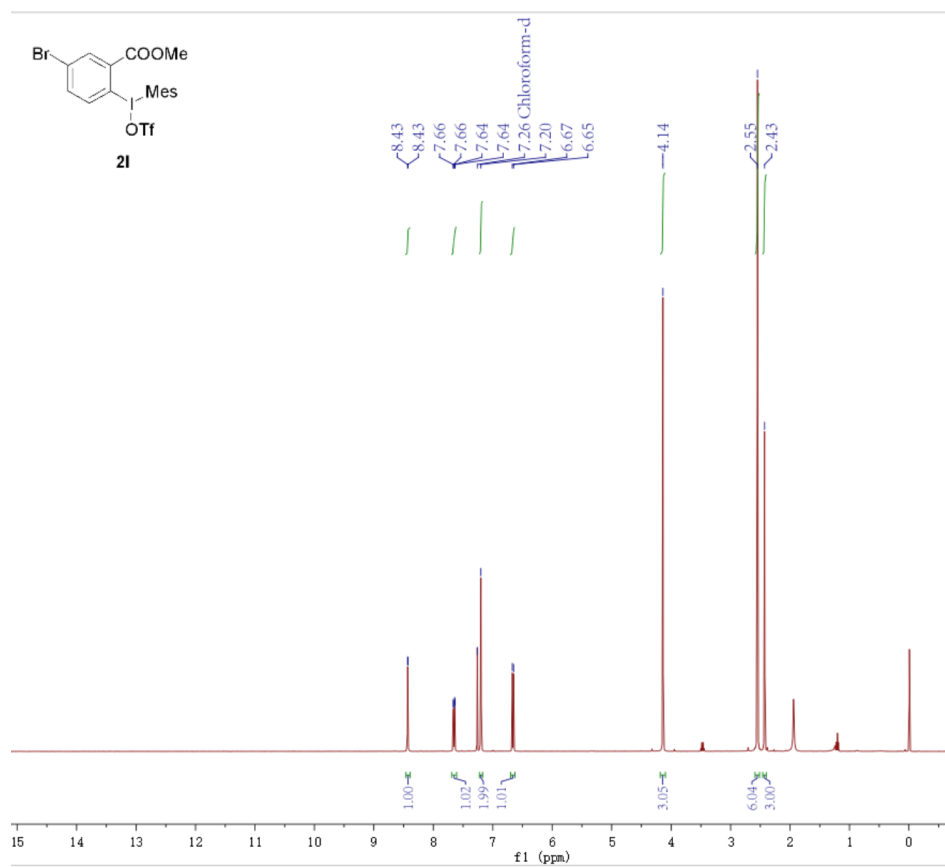



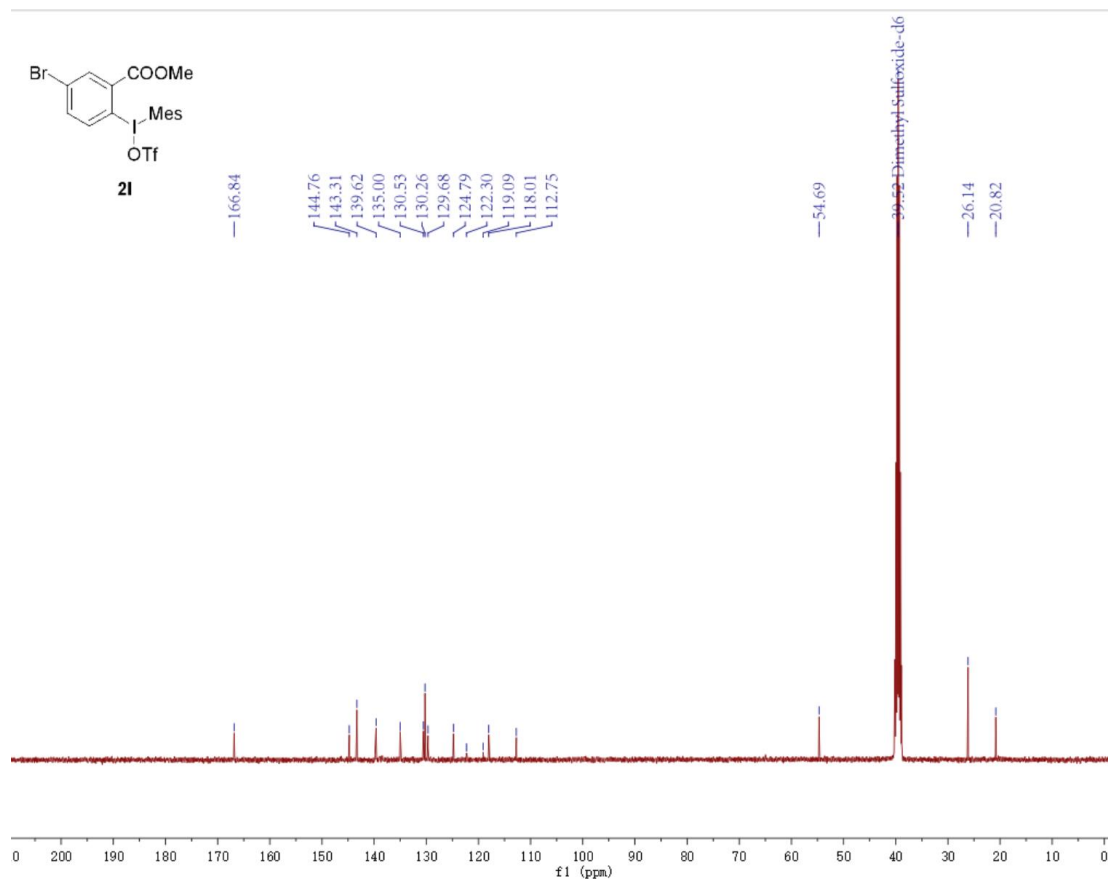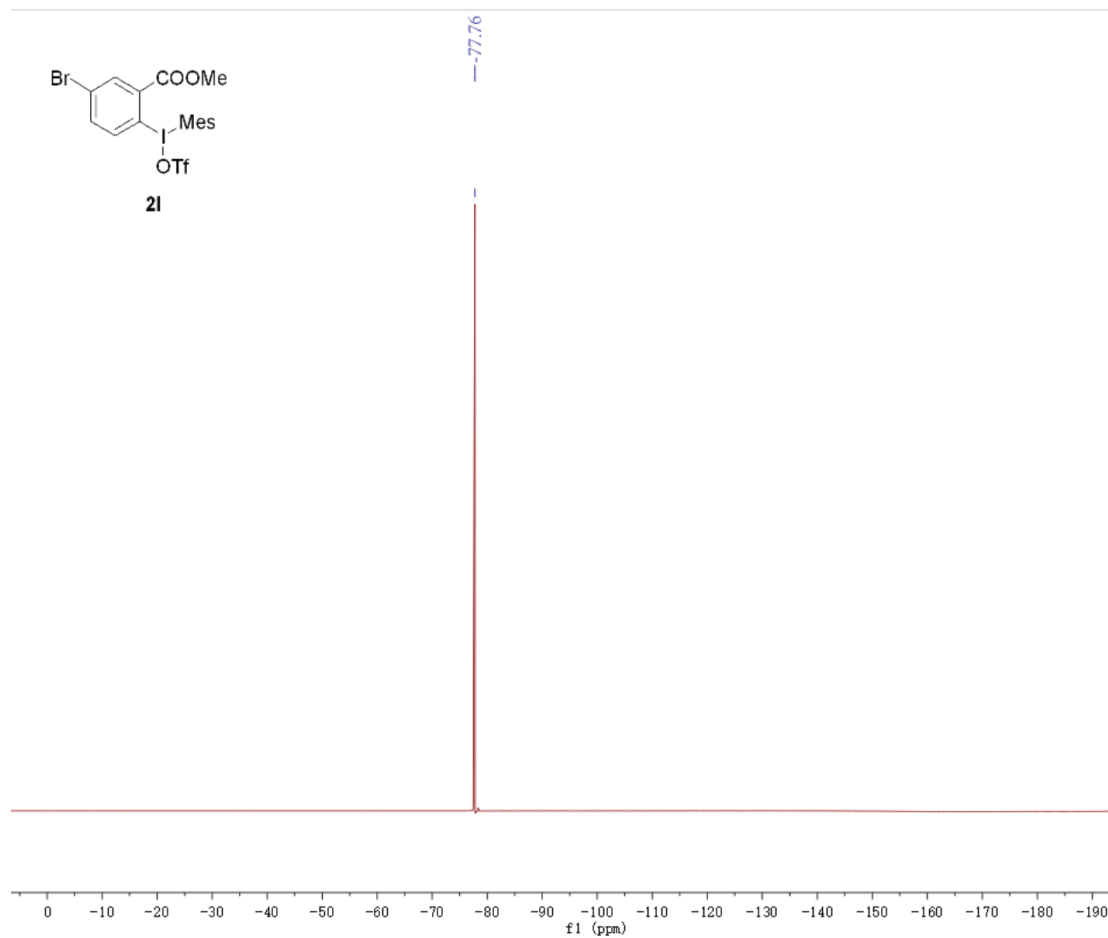

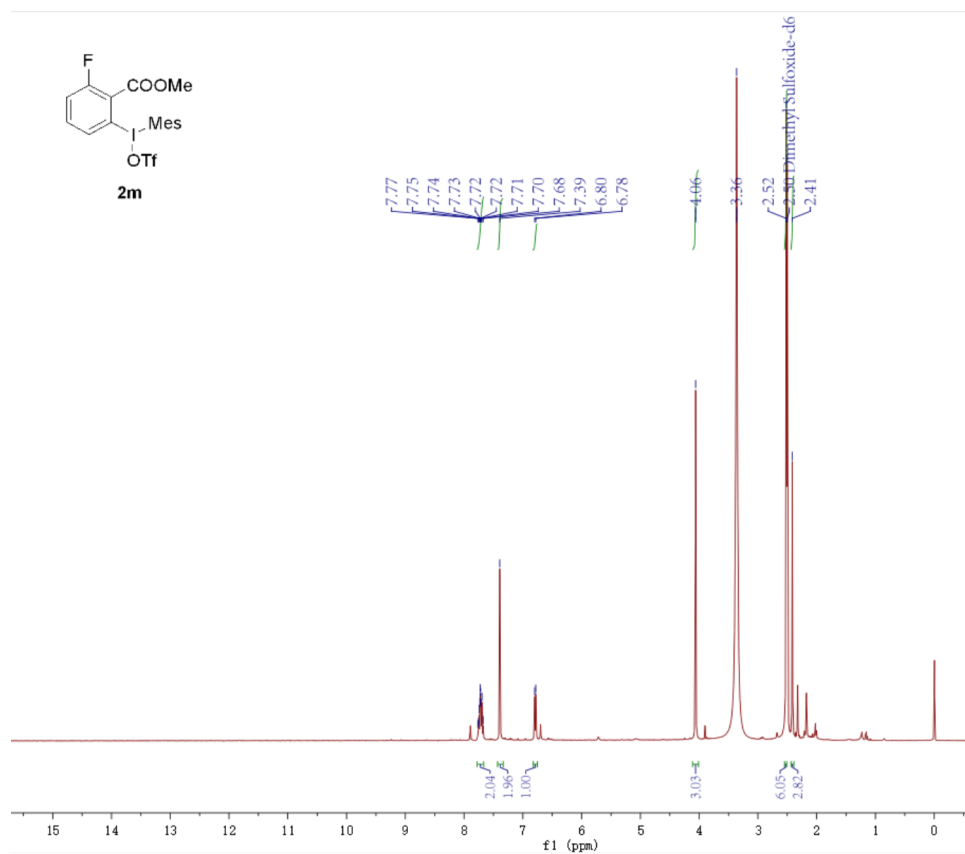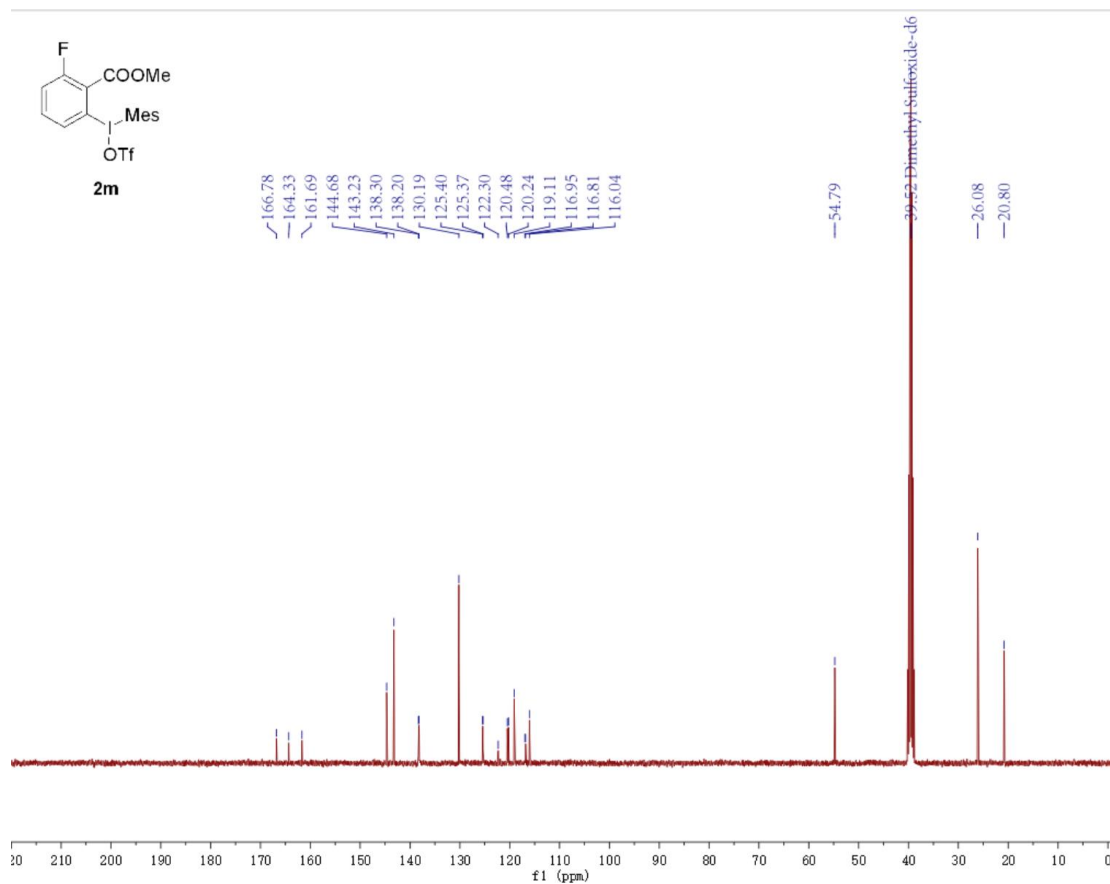

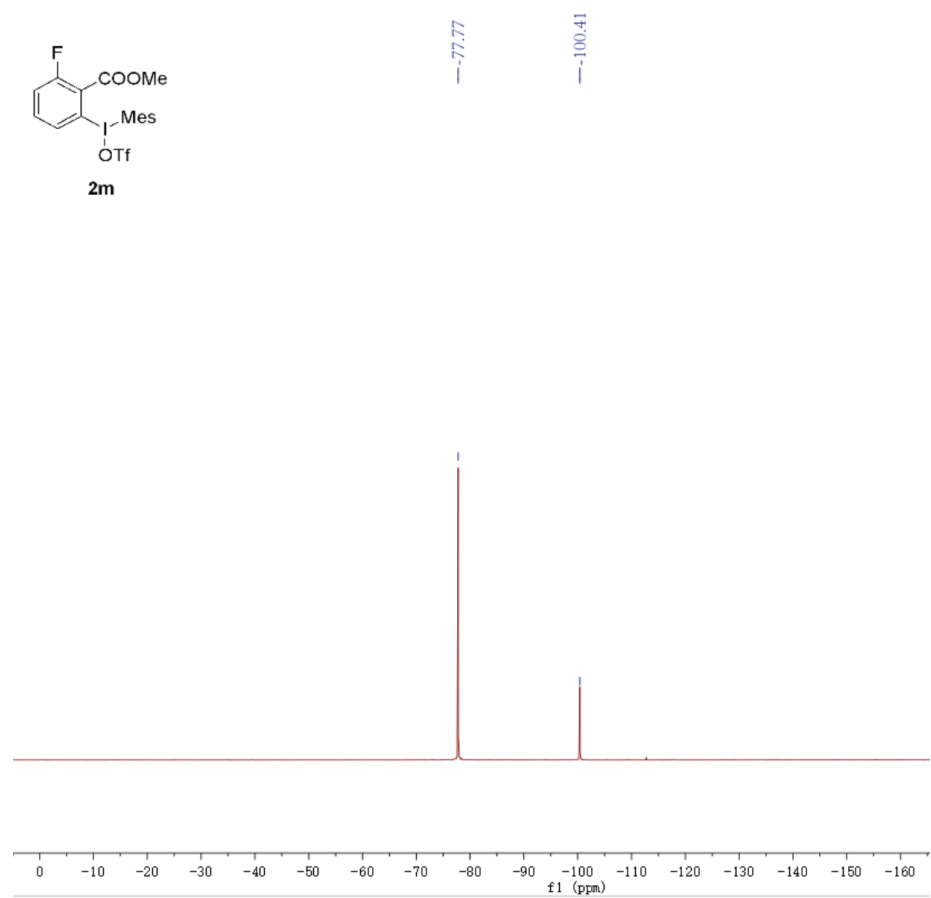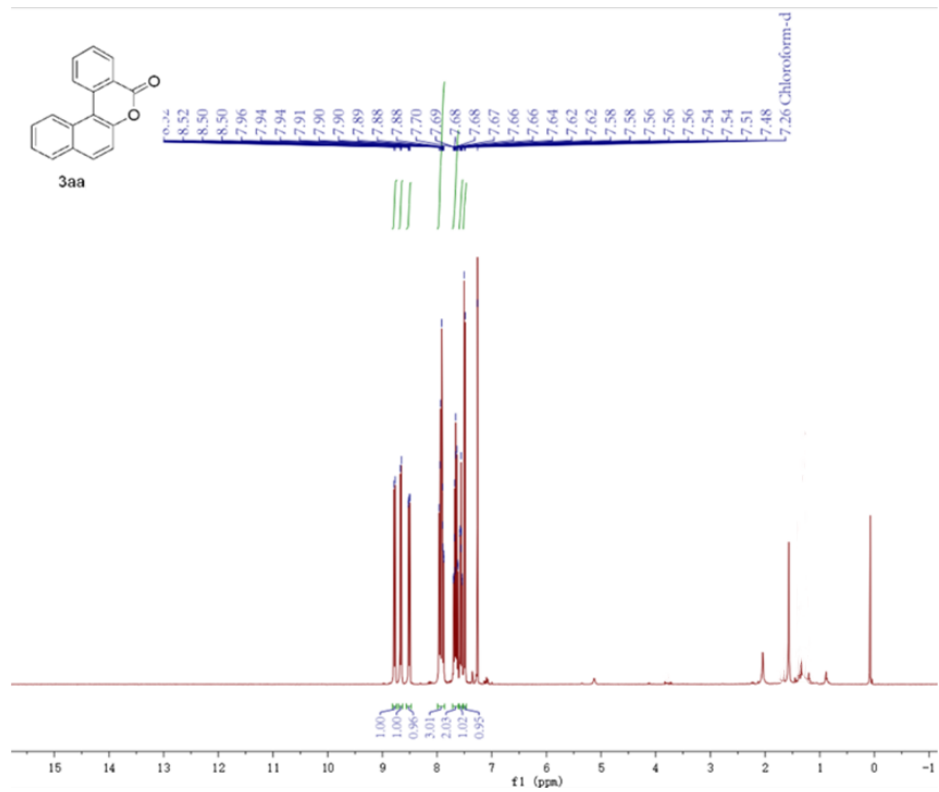

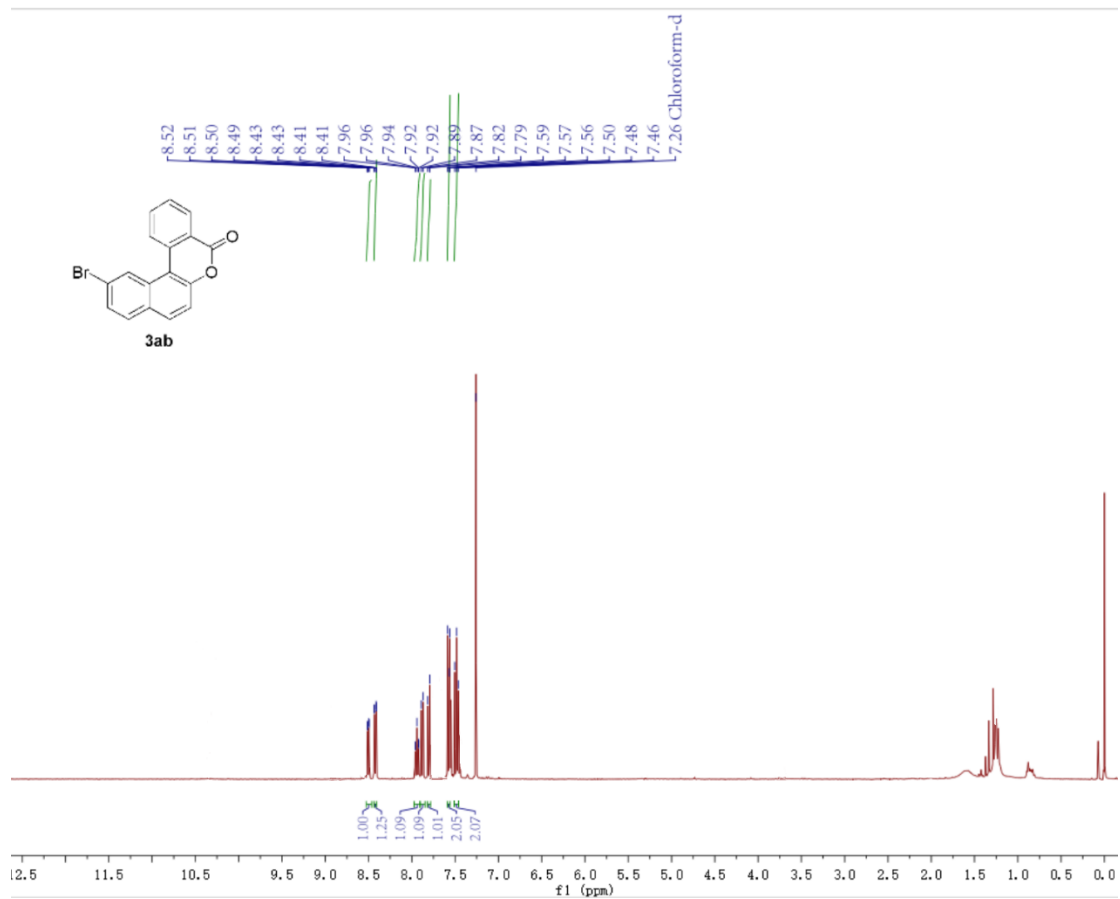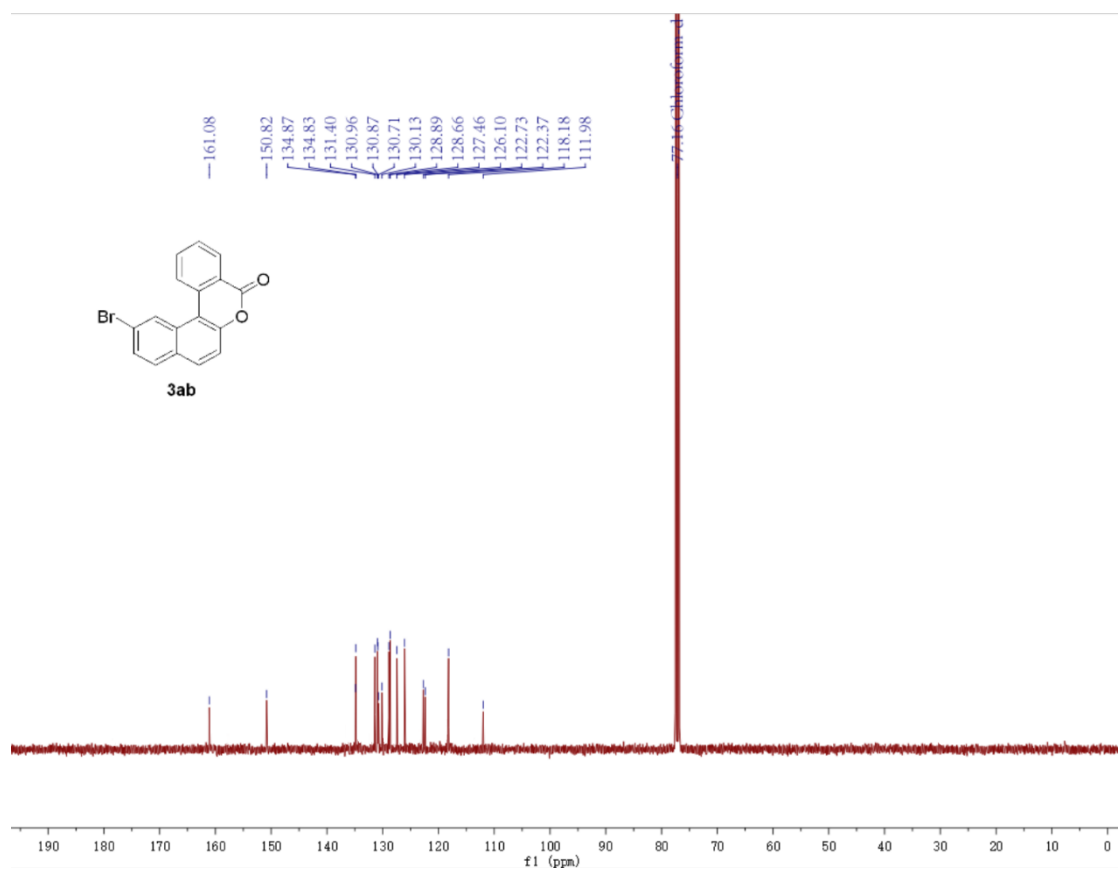

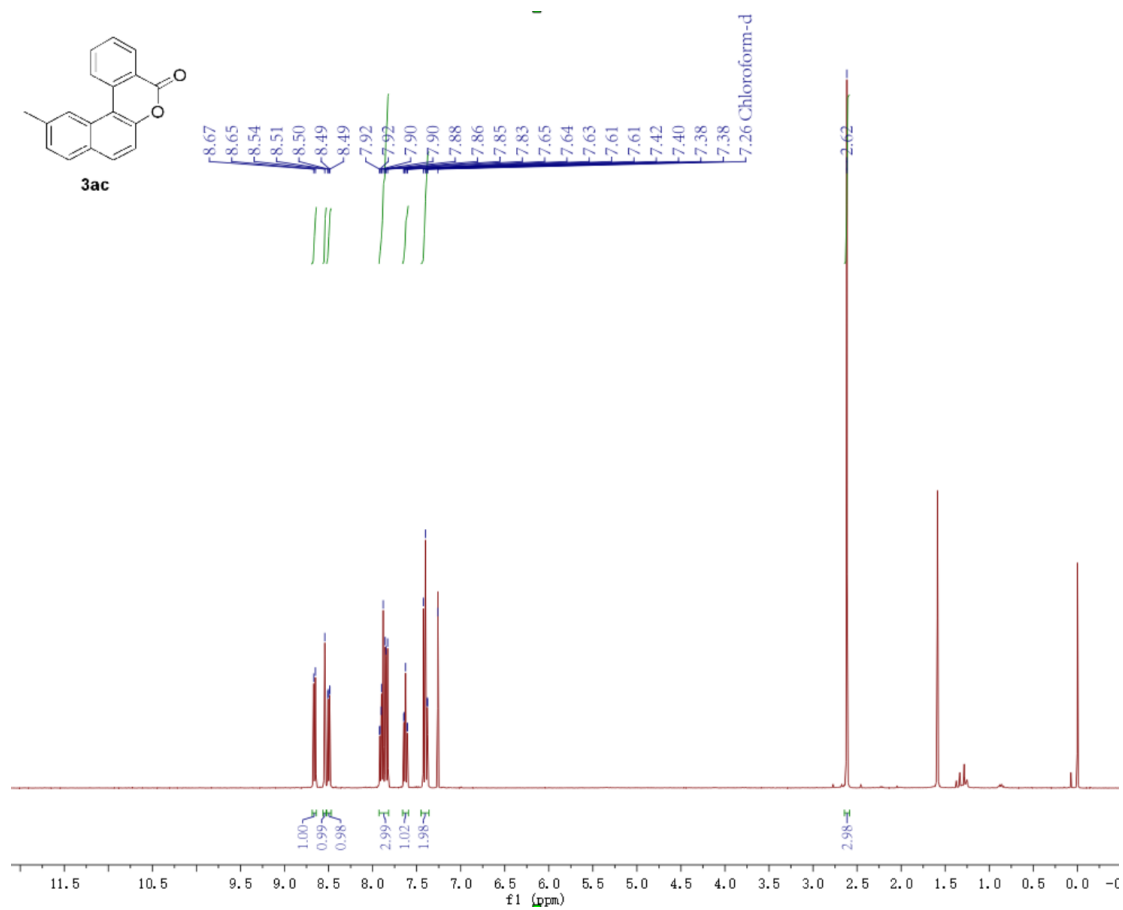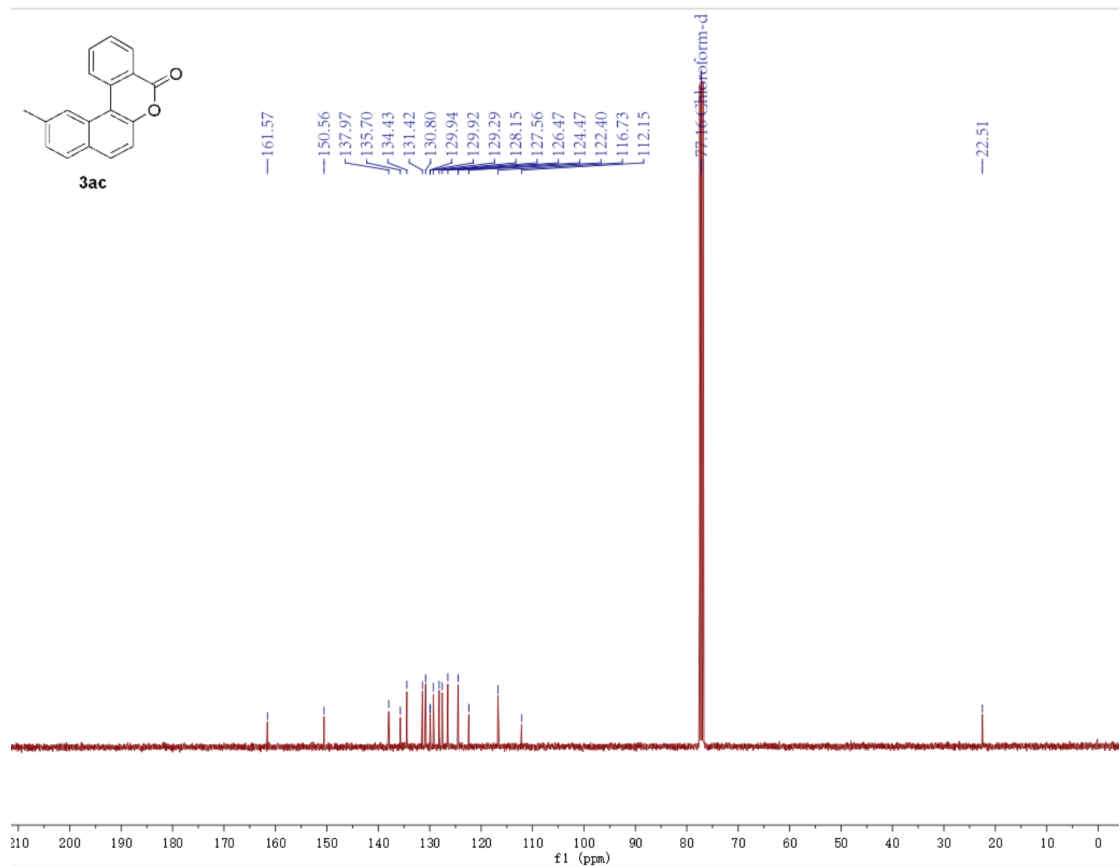

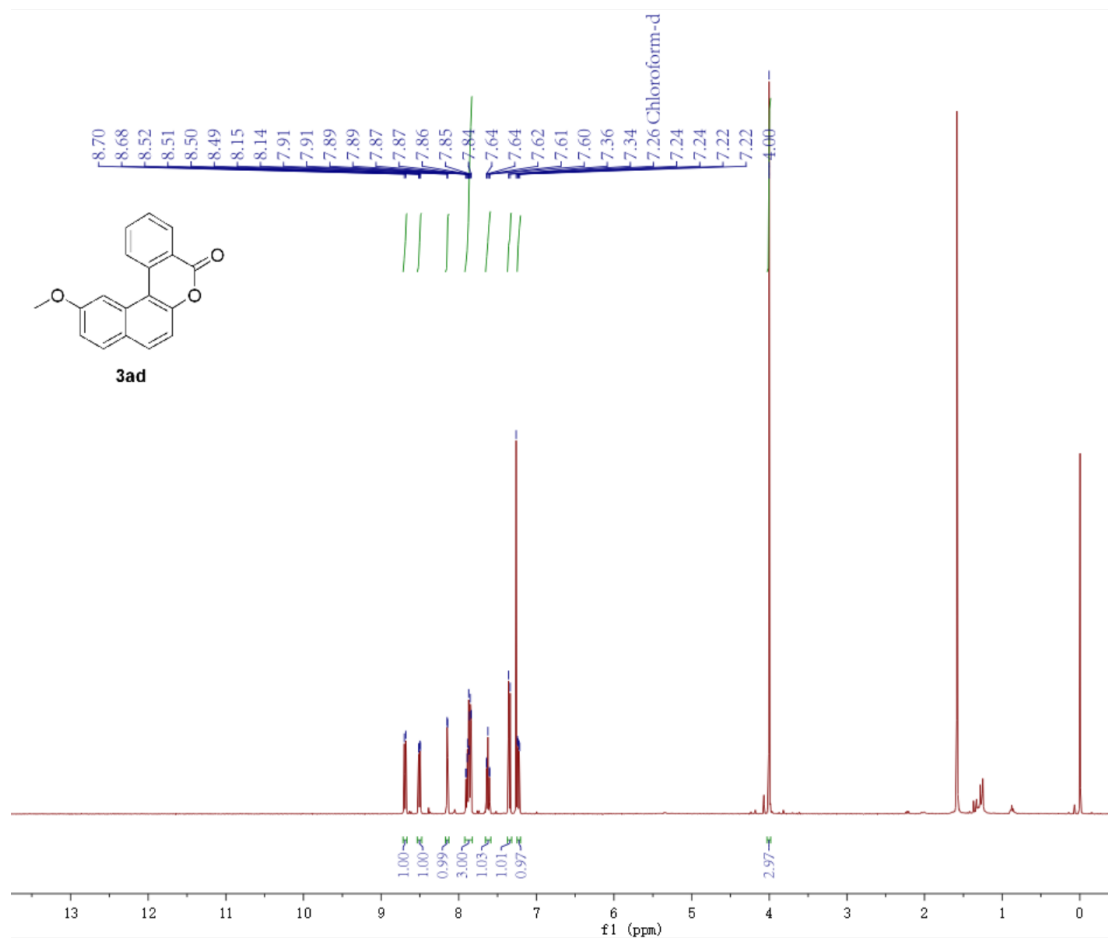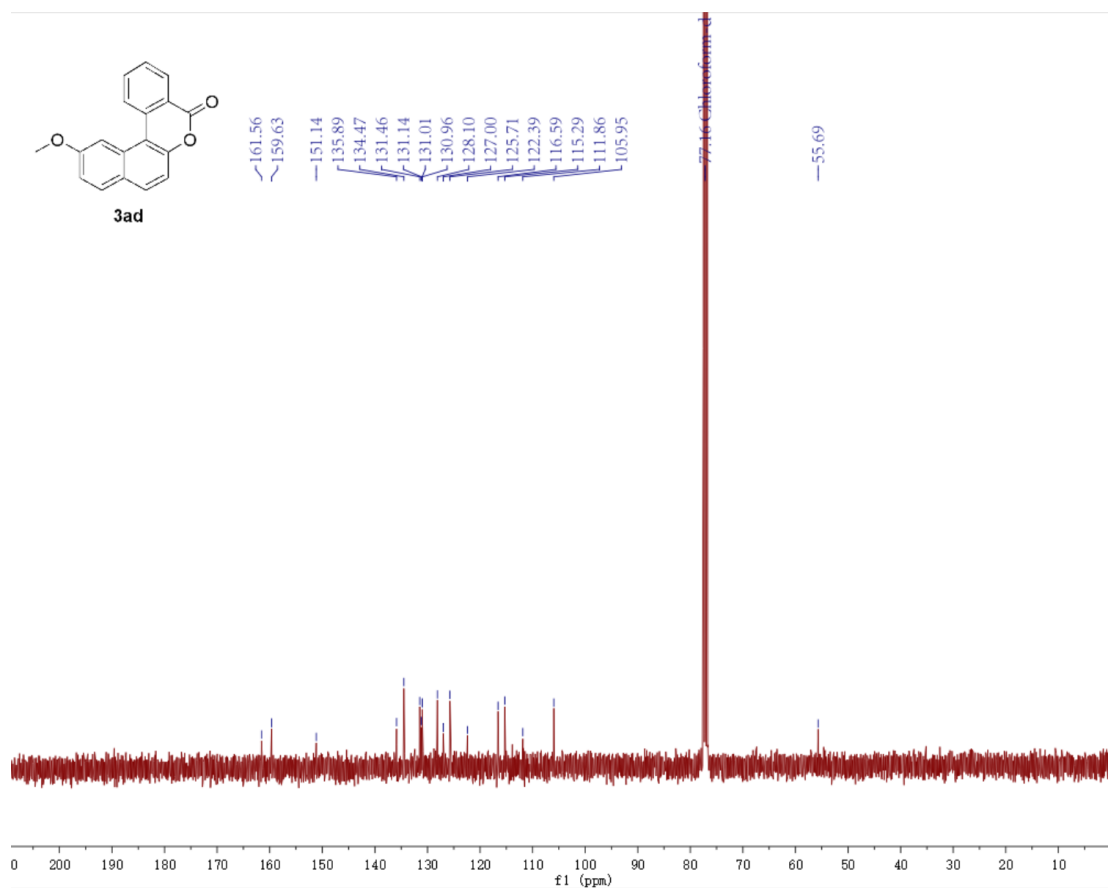

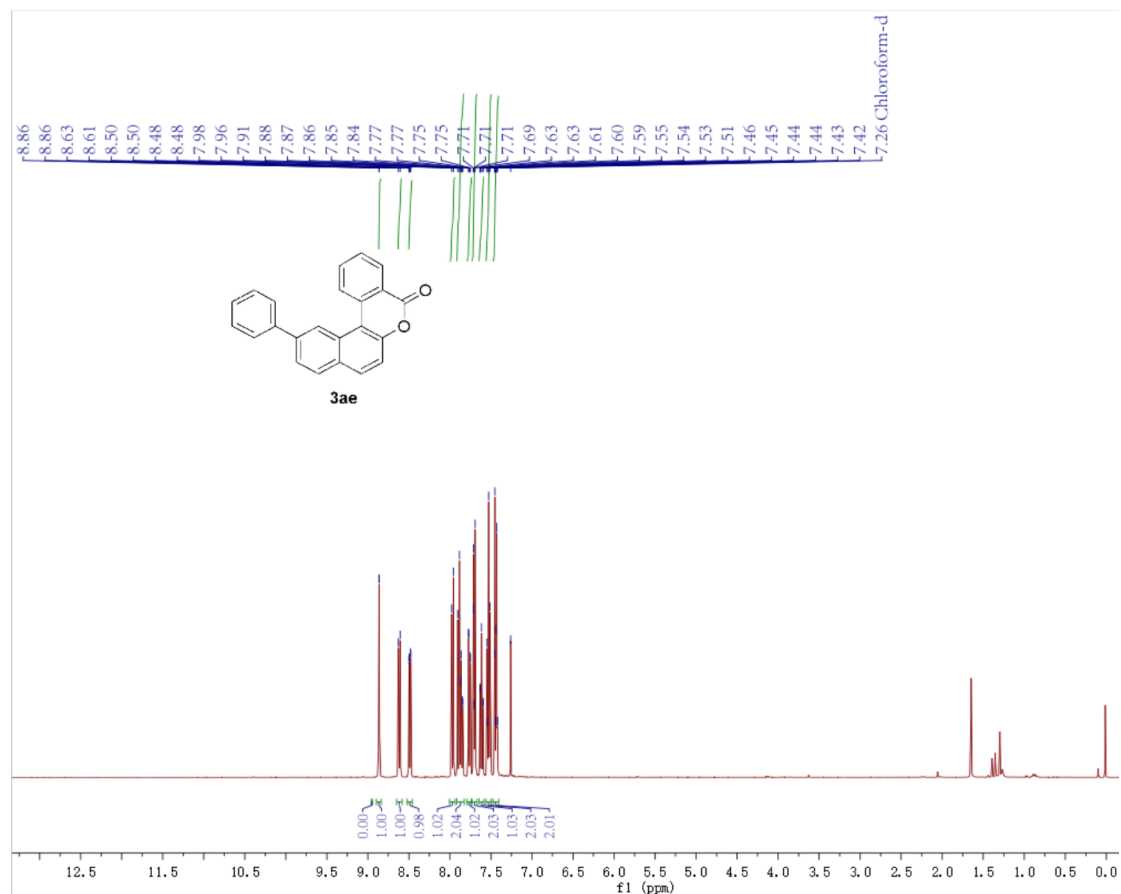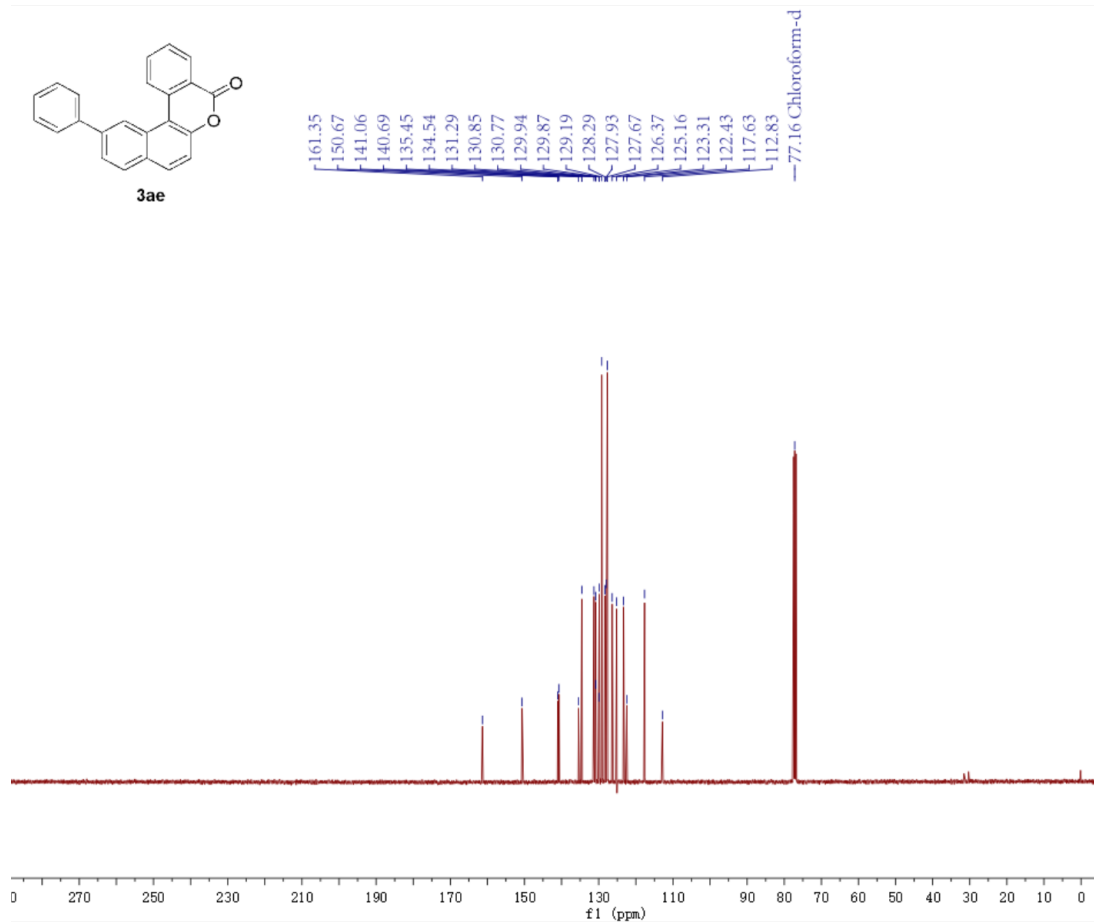

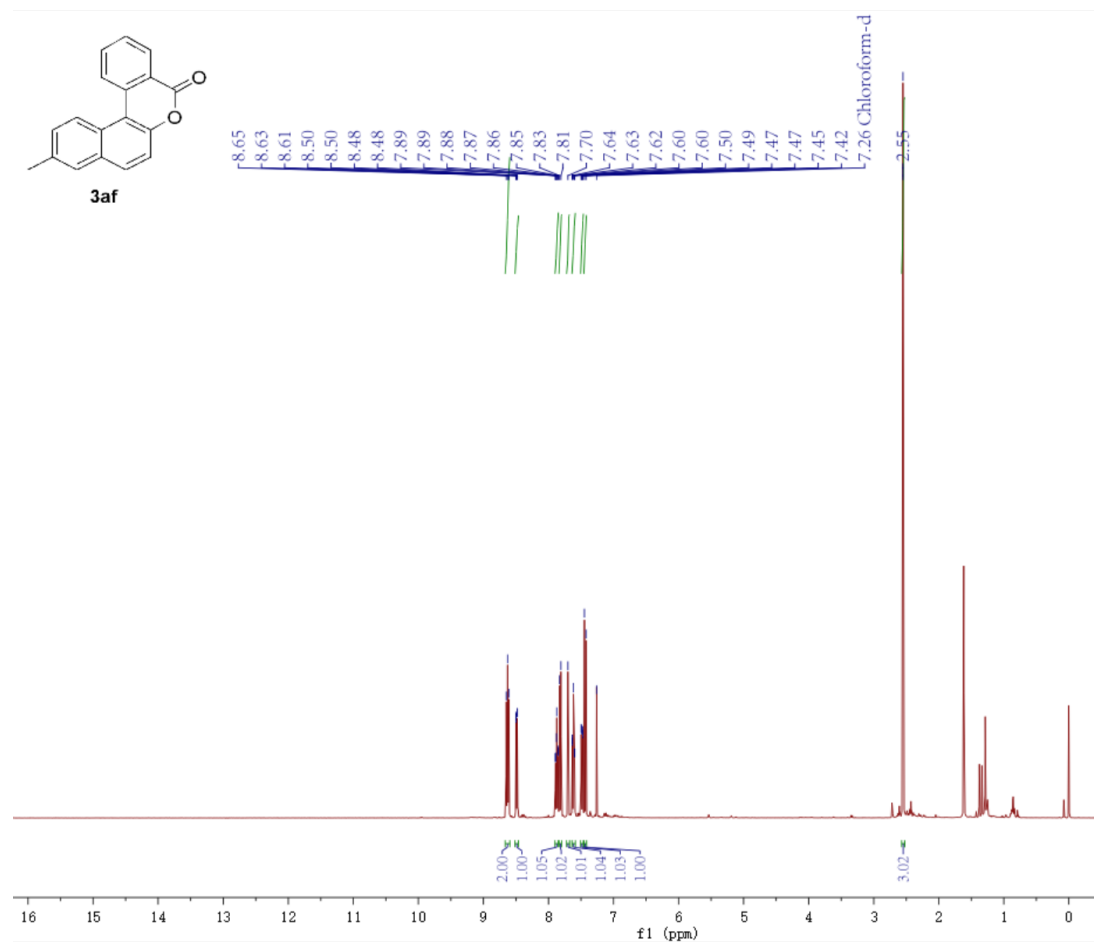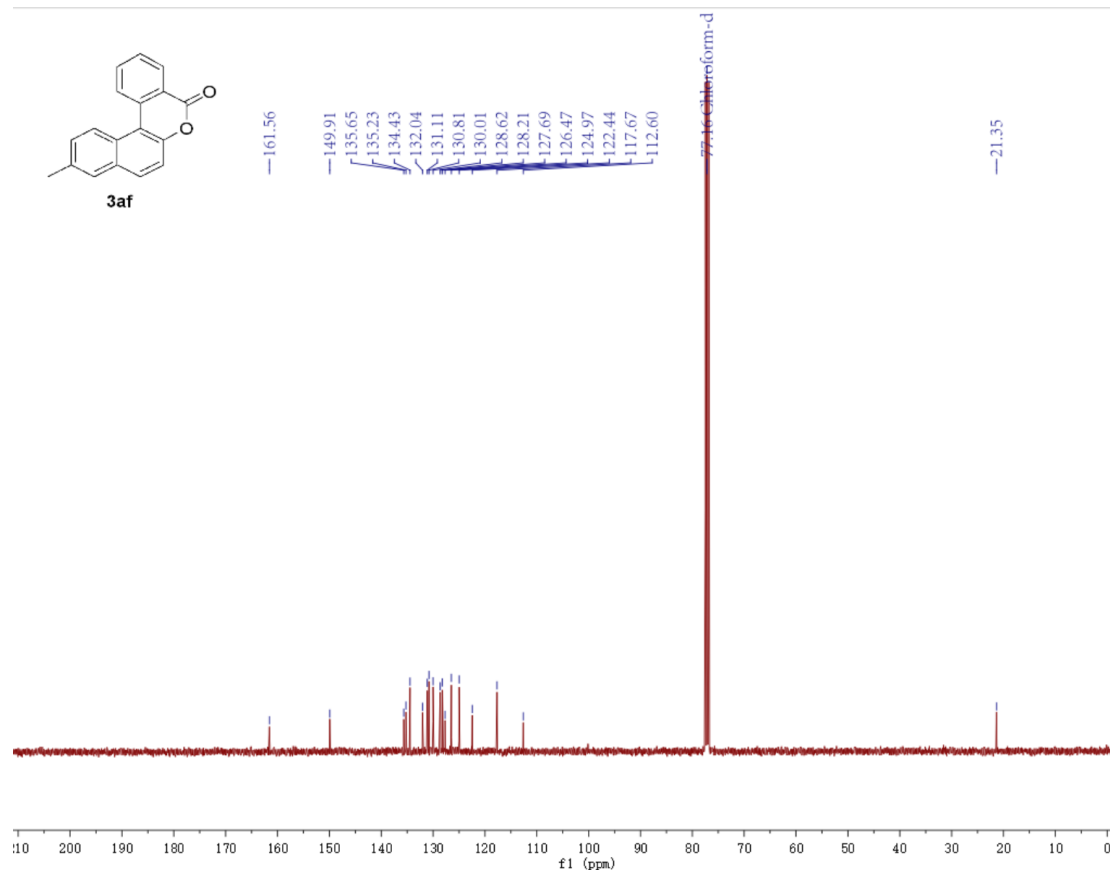



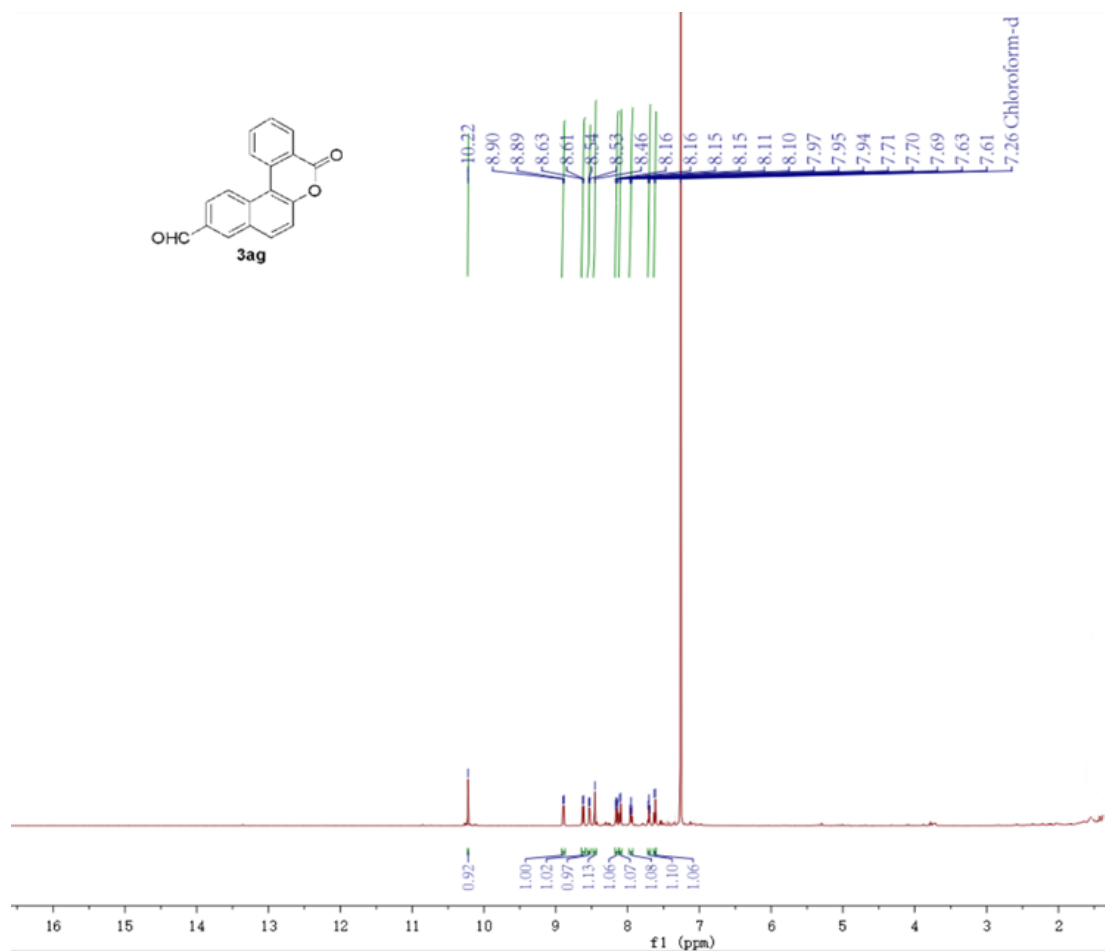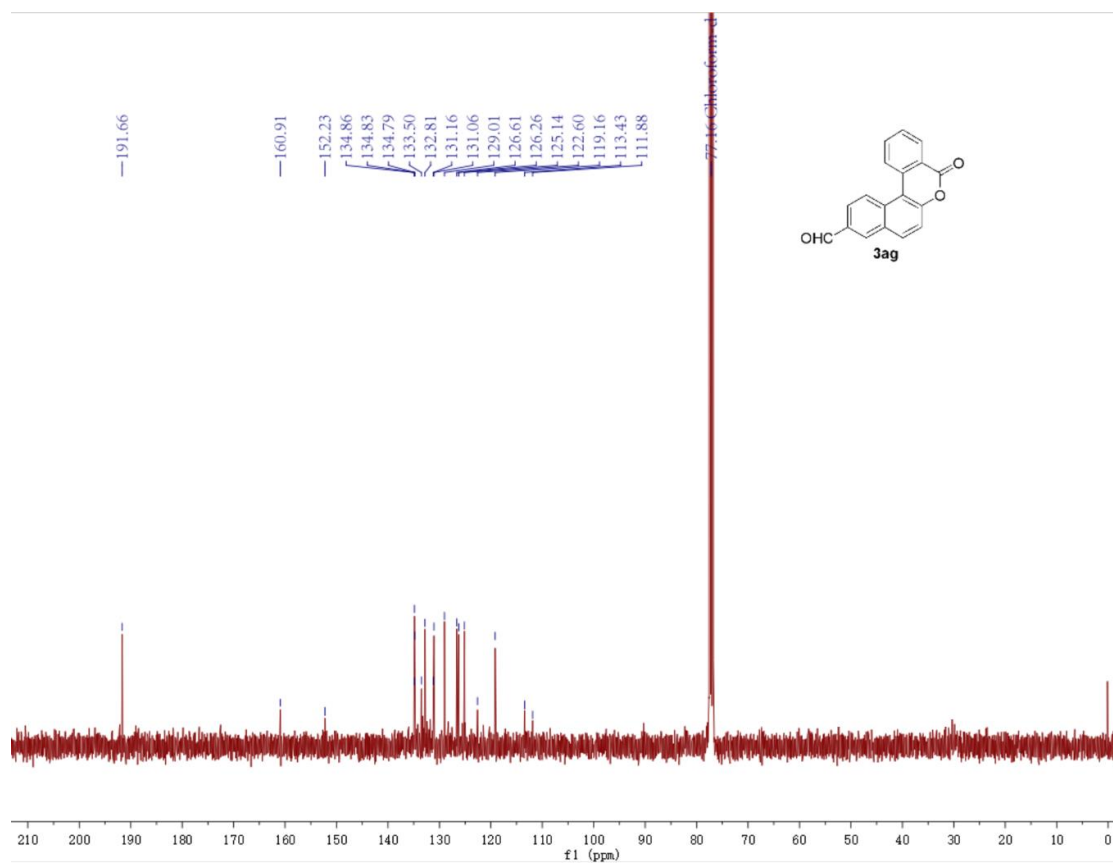

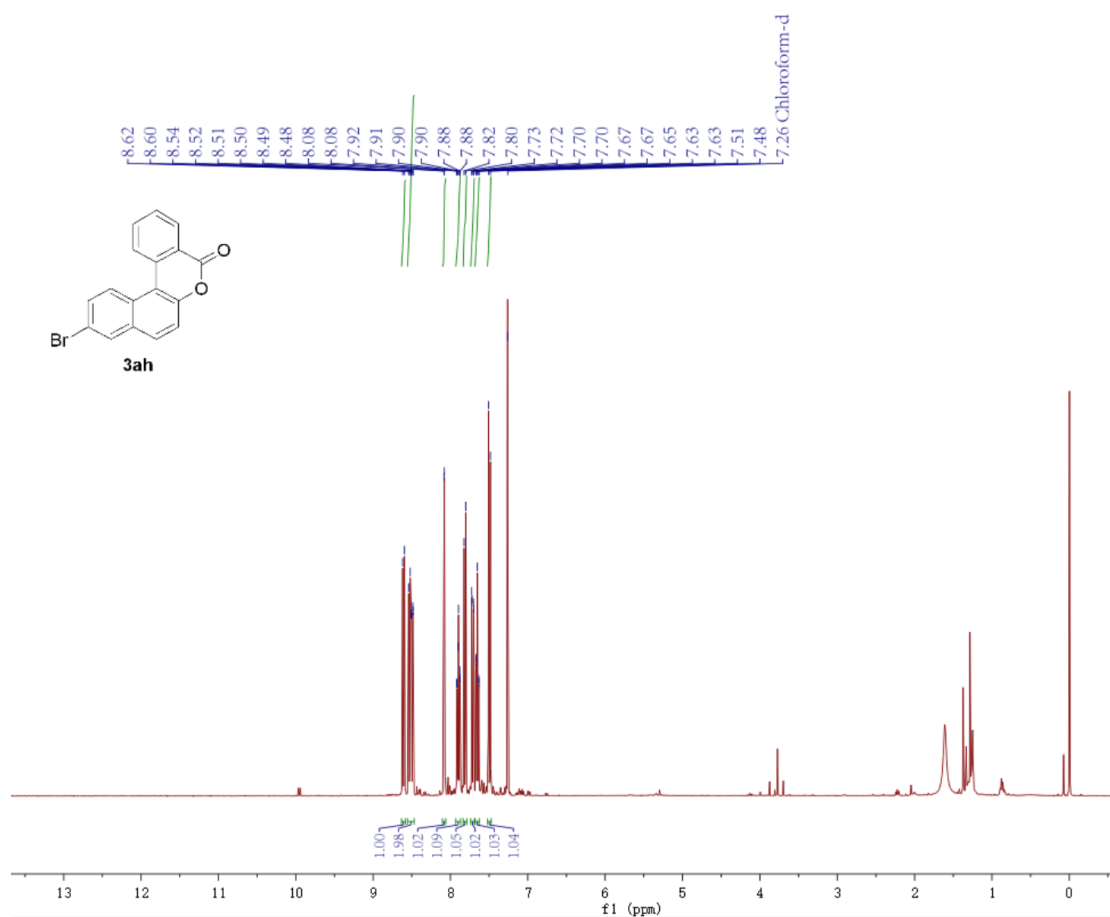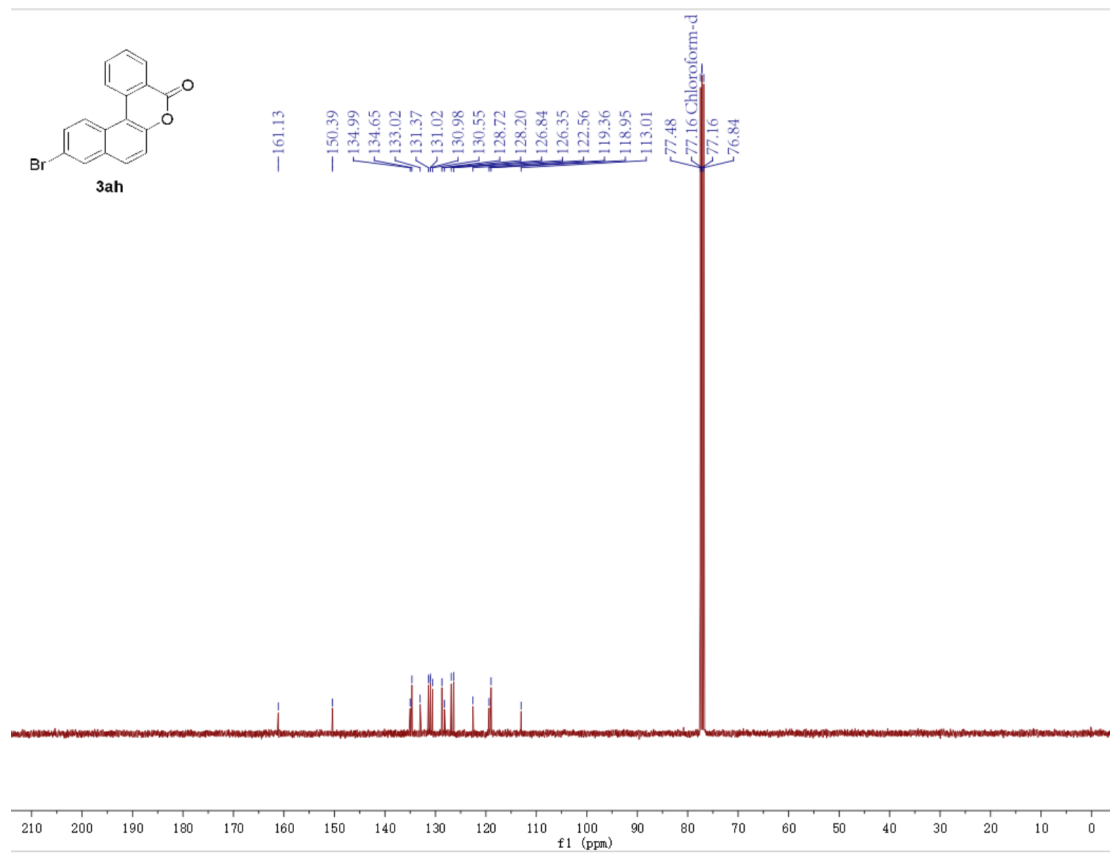

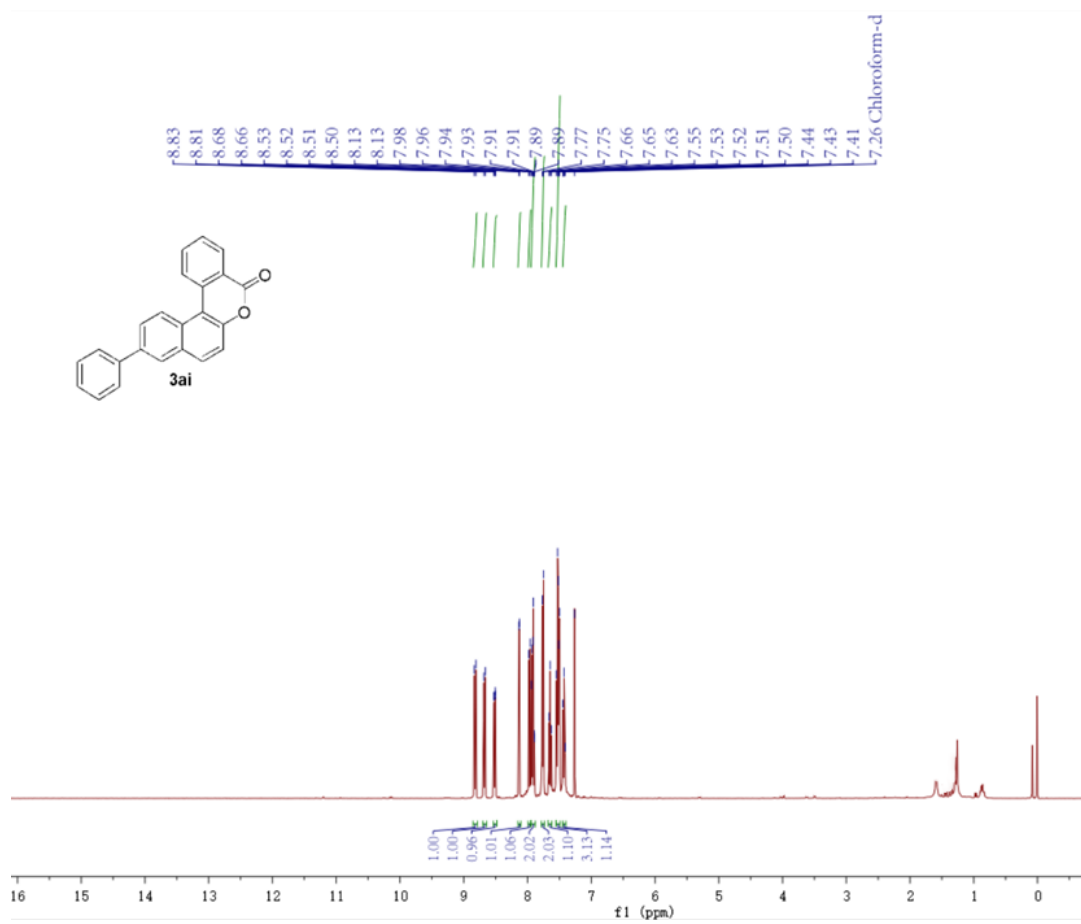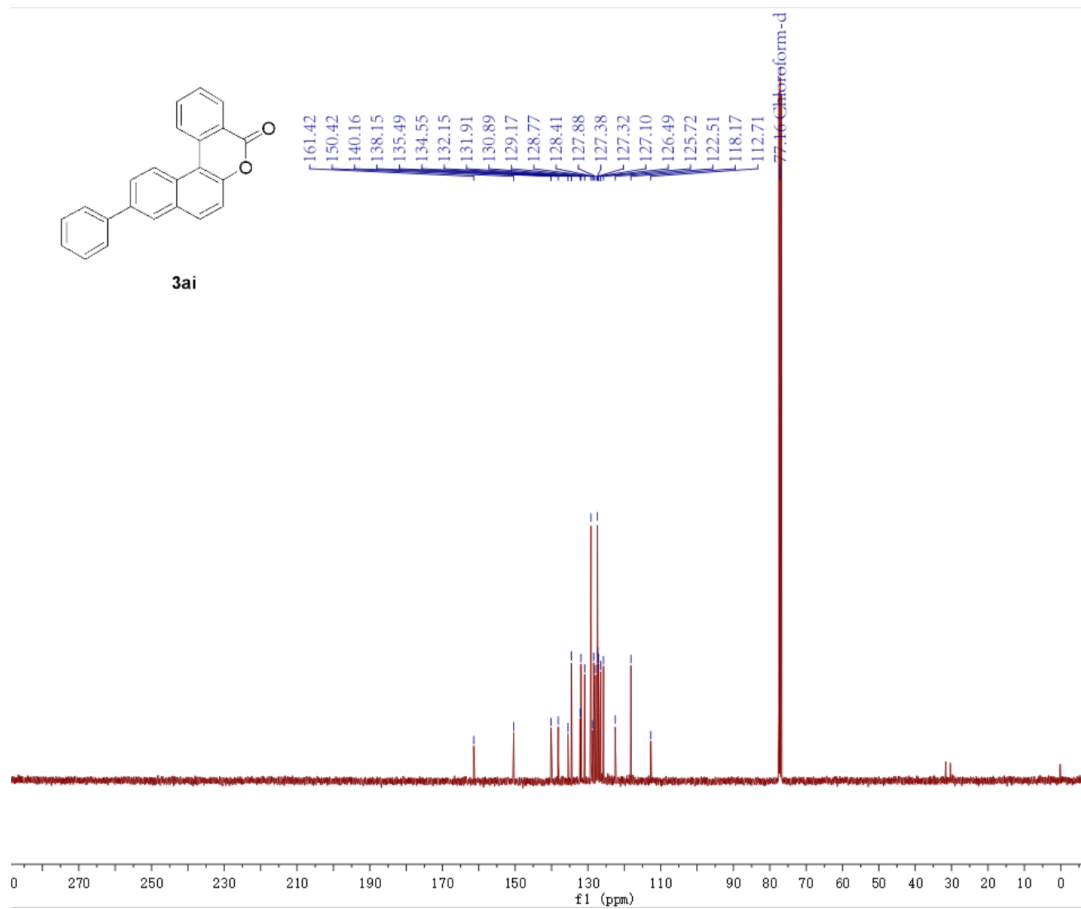

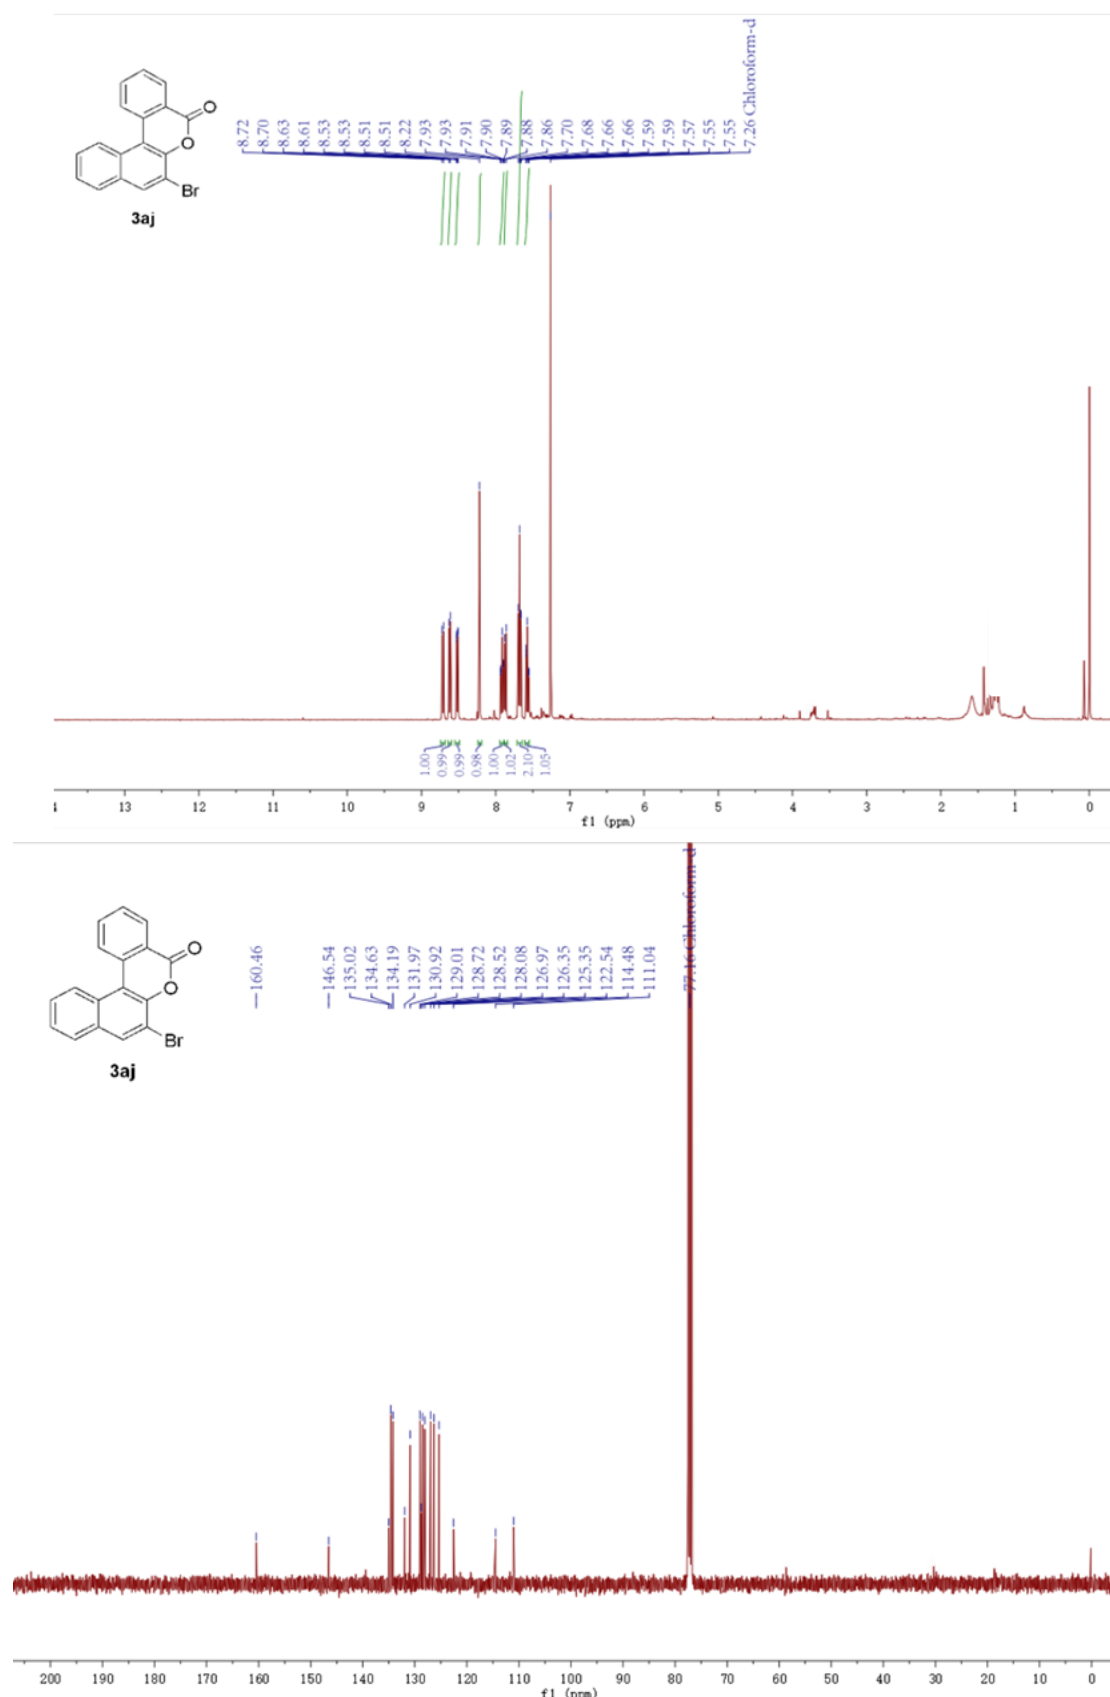

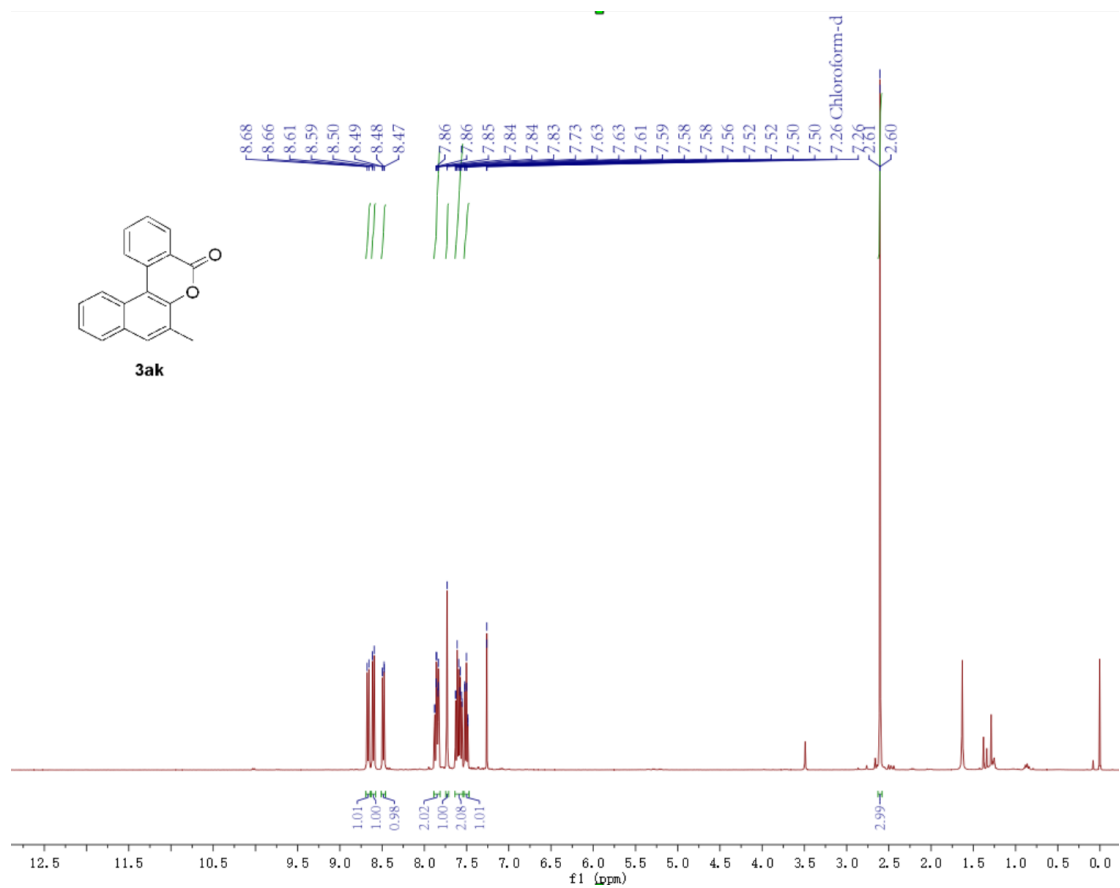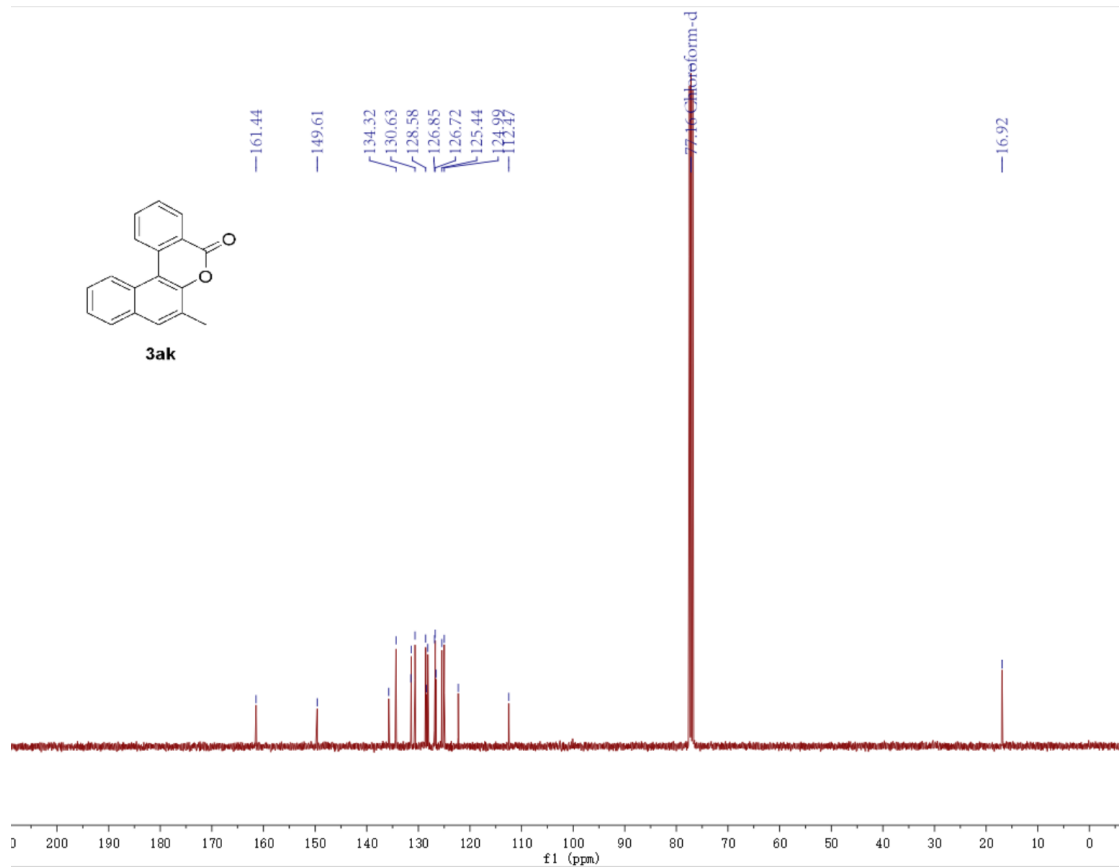

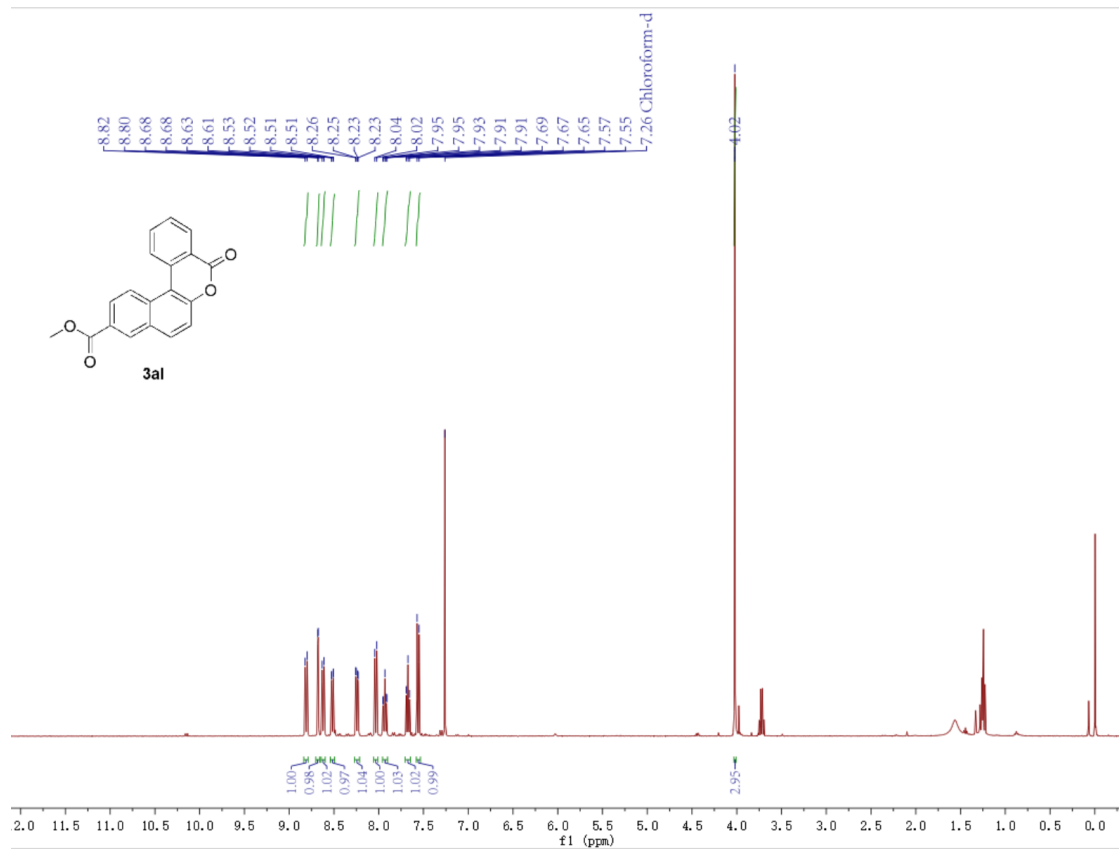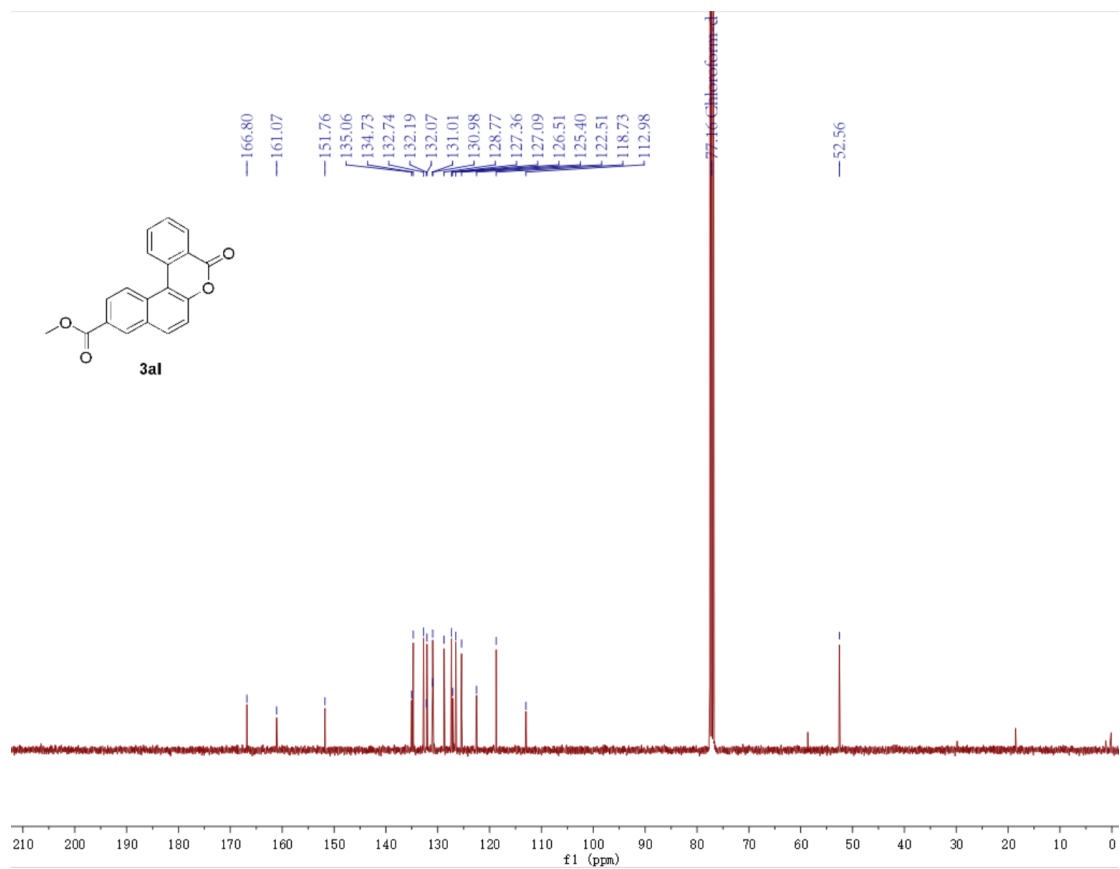

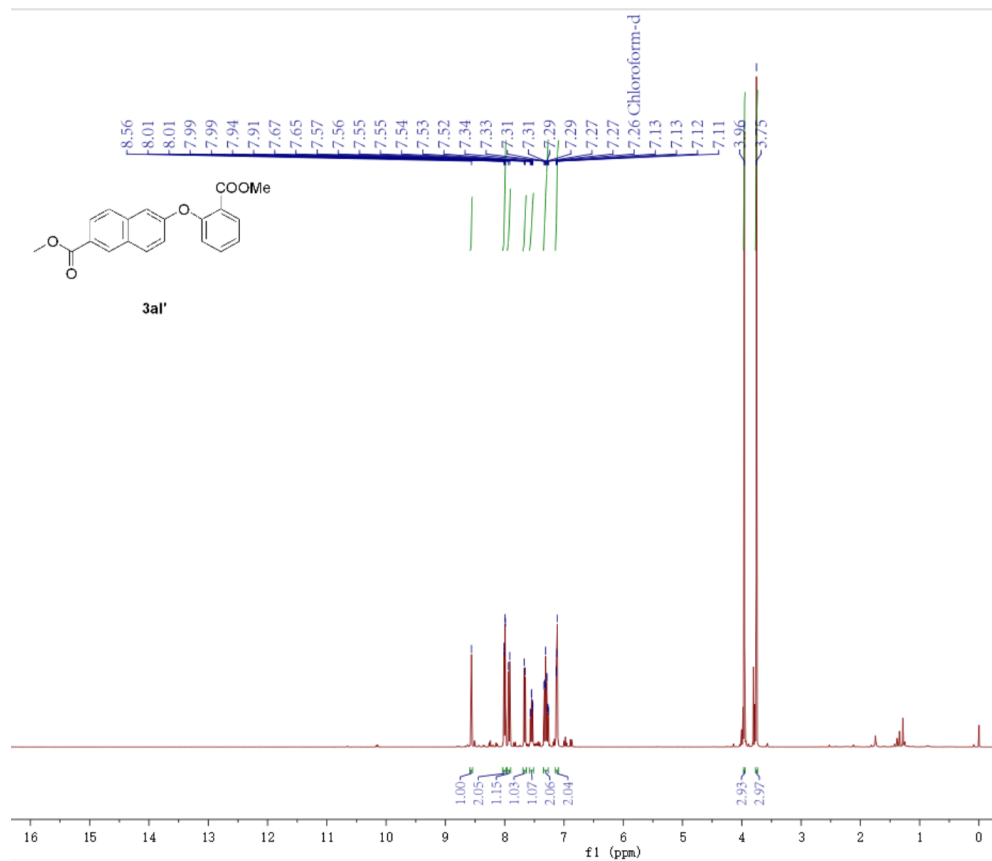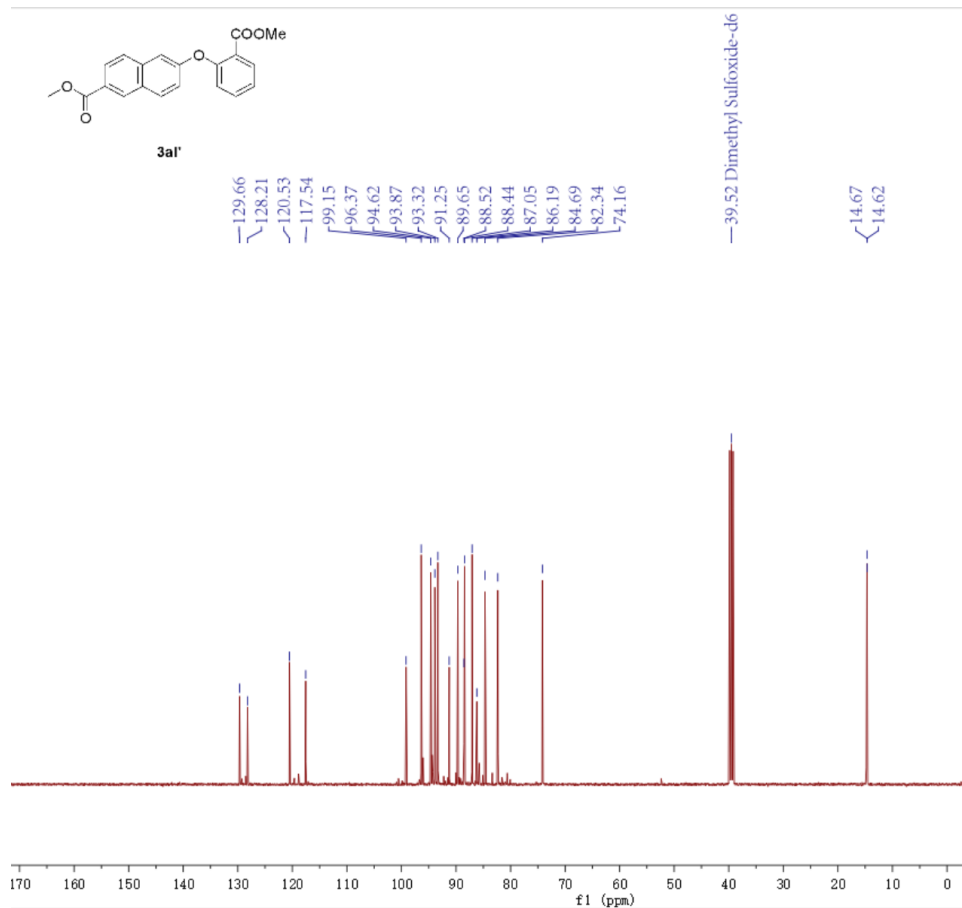

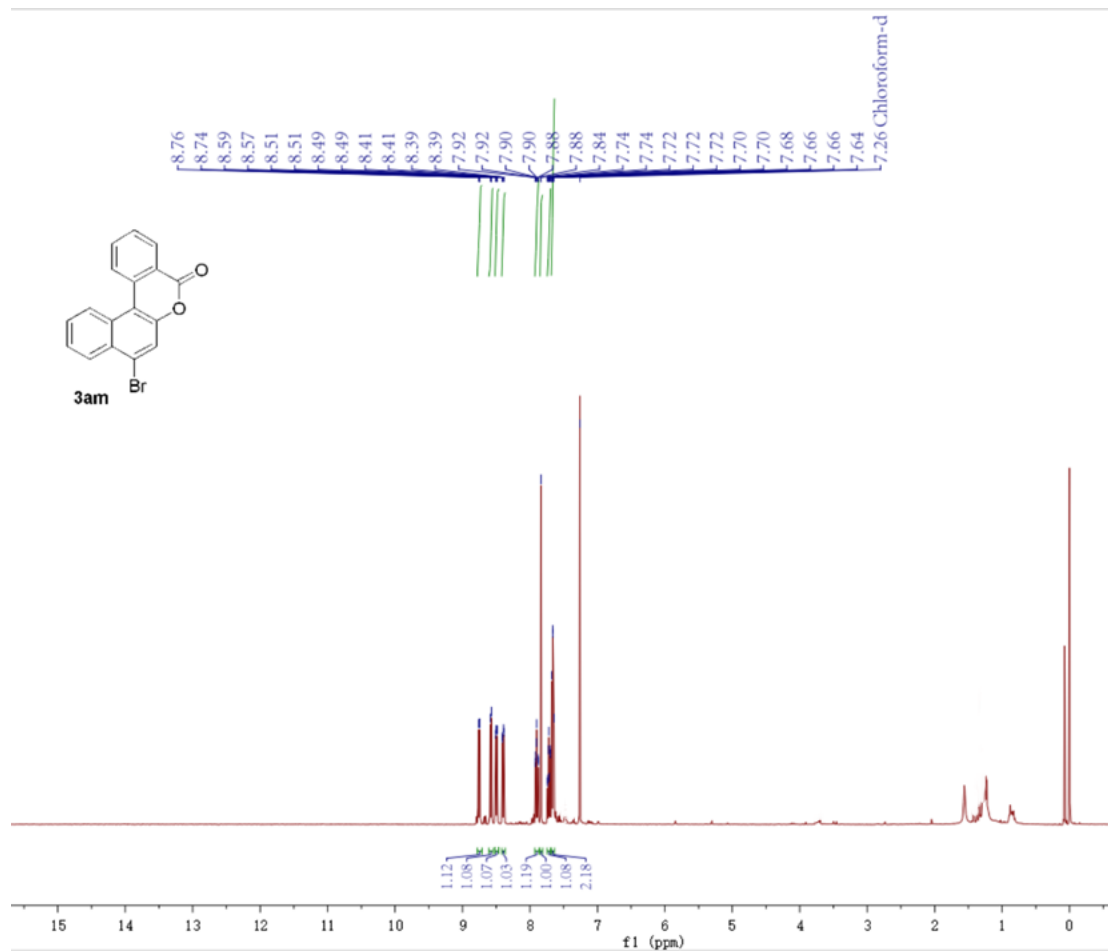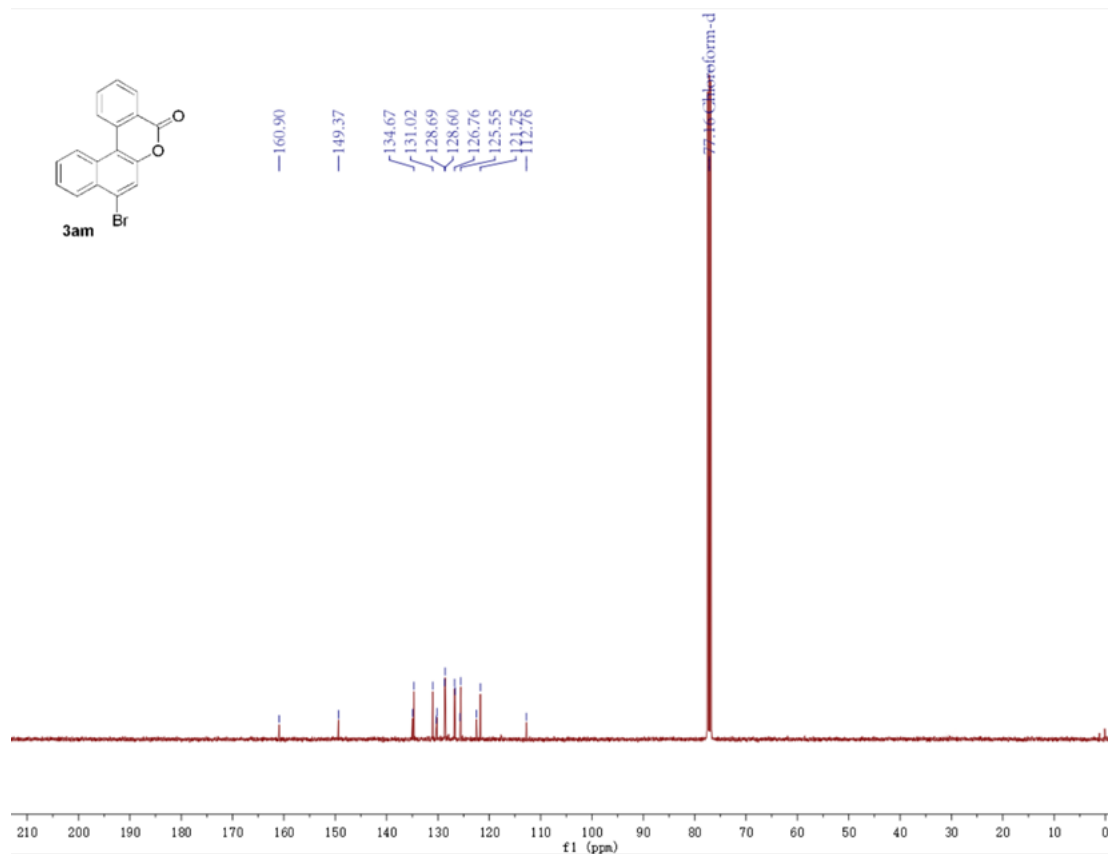



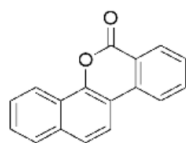

3an

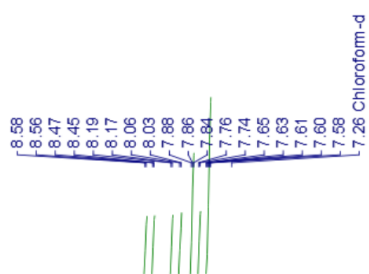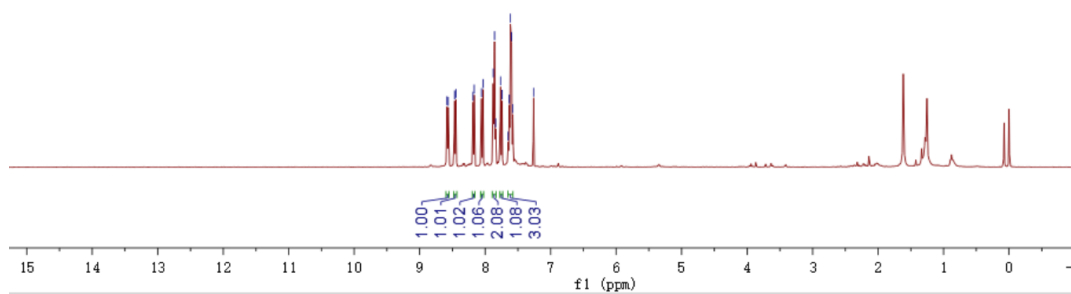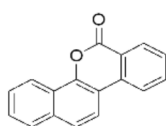

3an

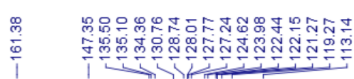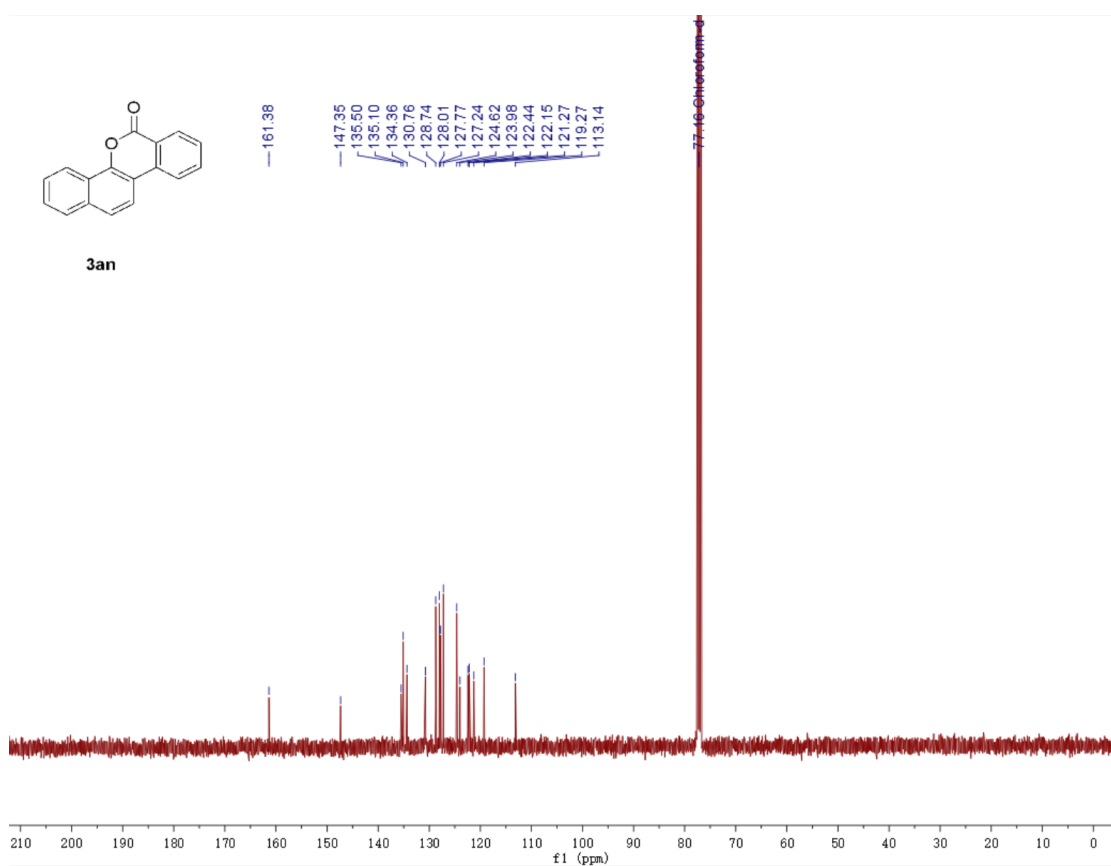

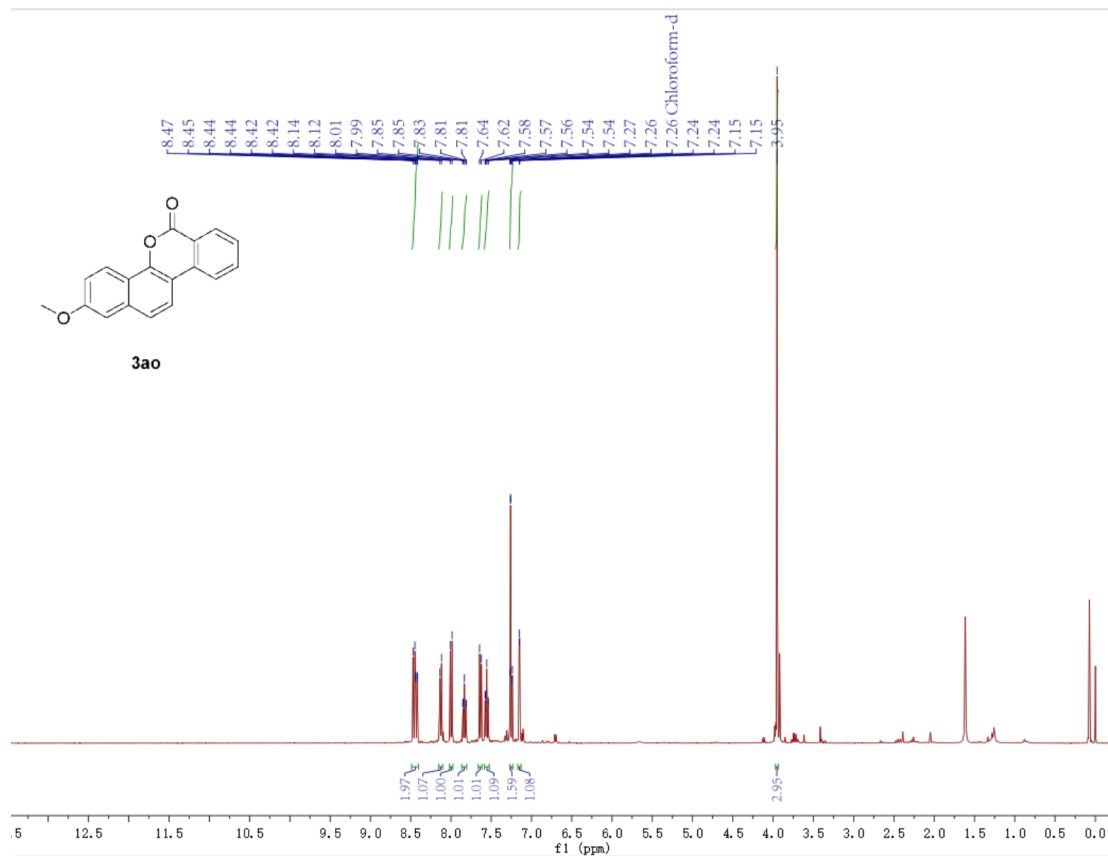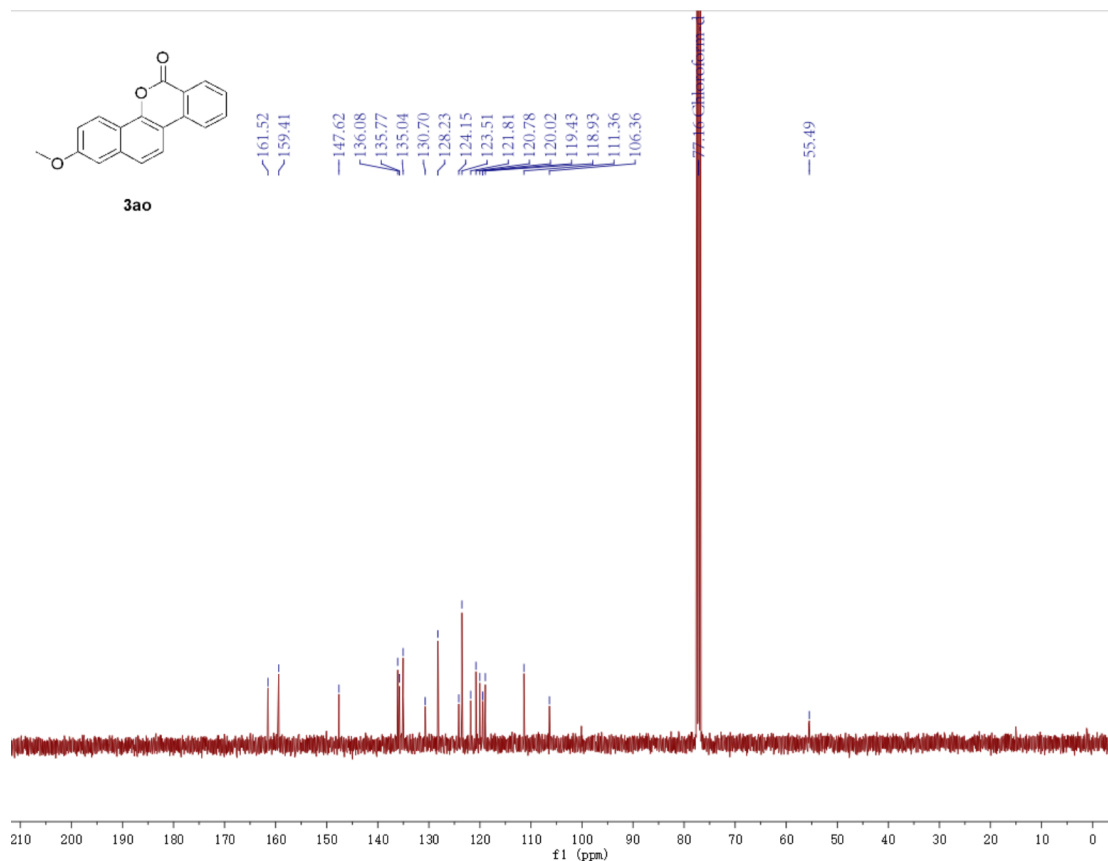

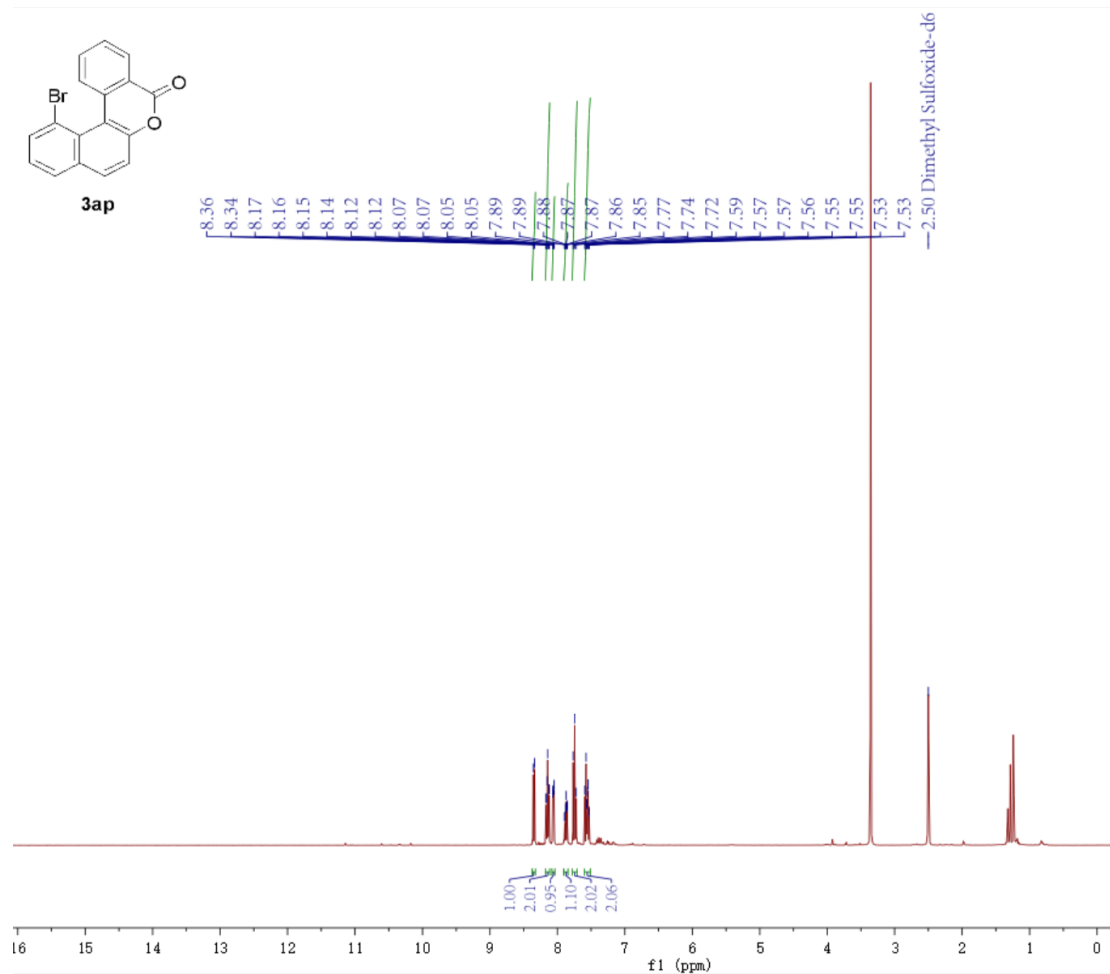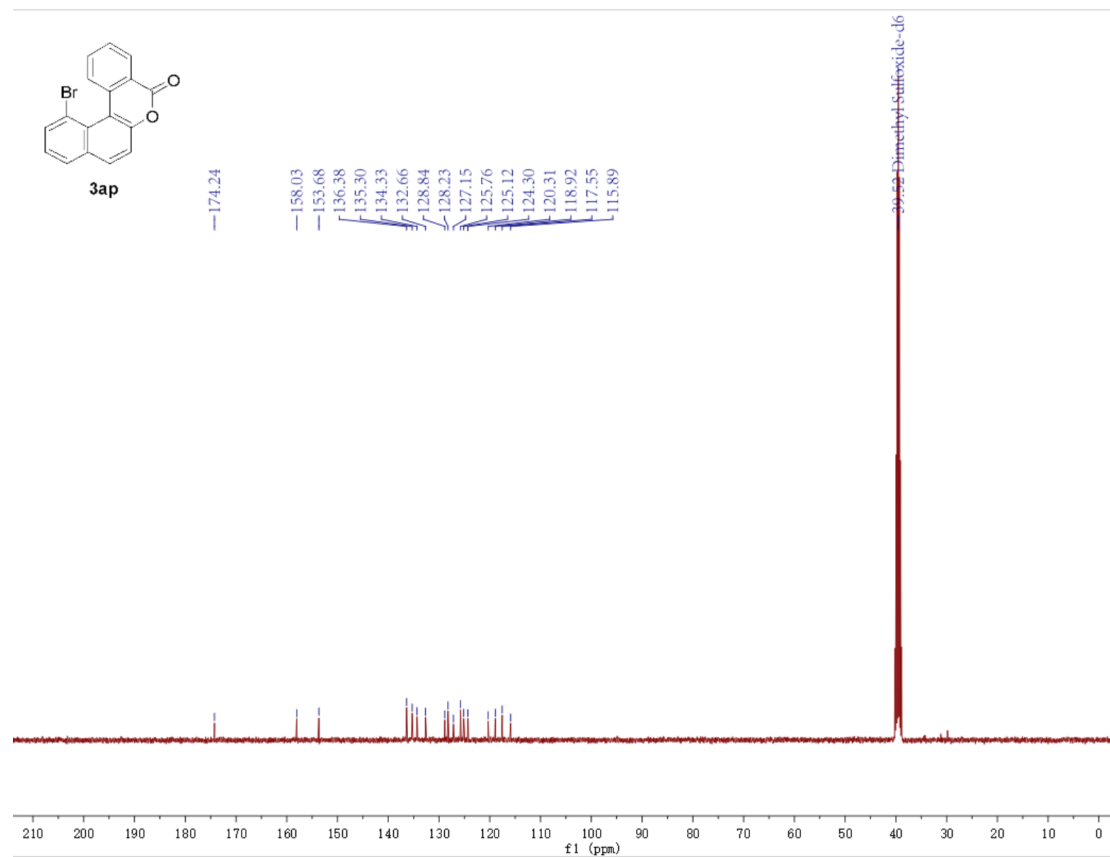

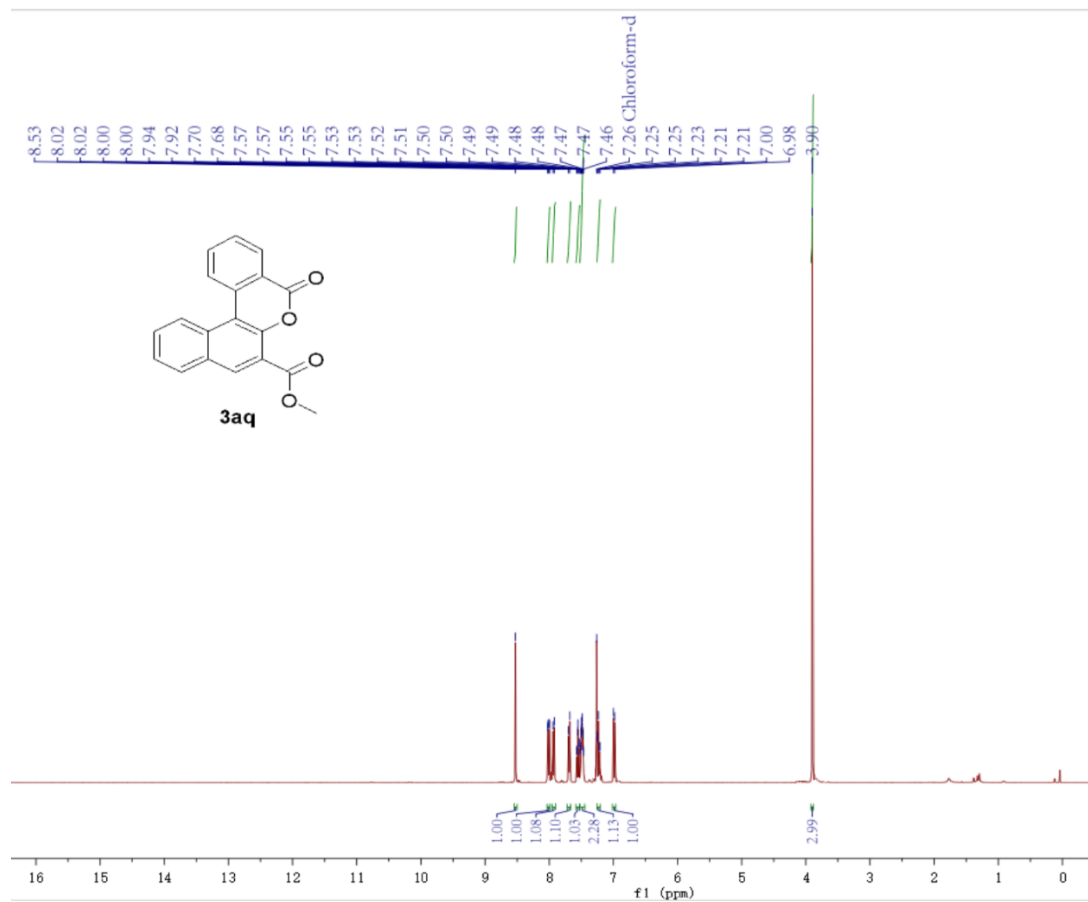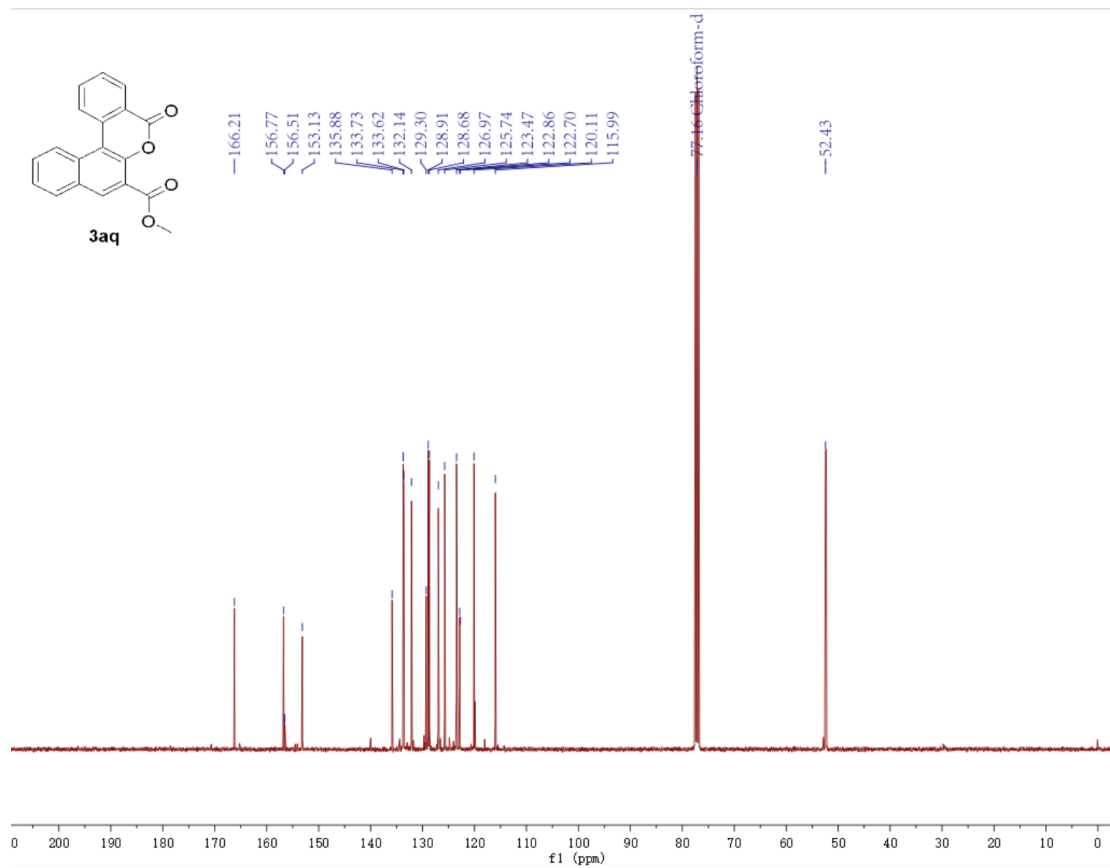

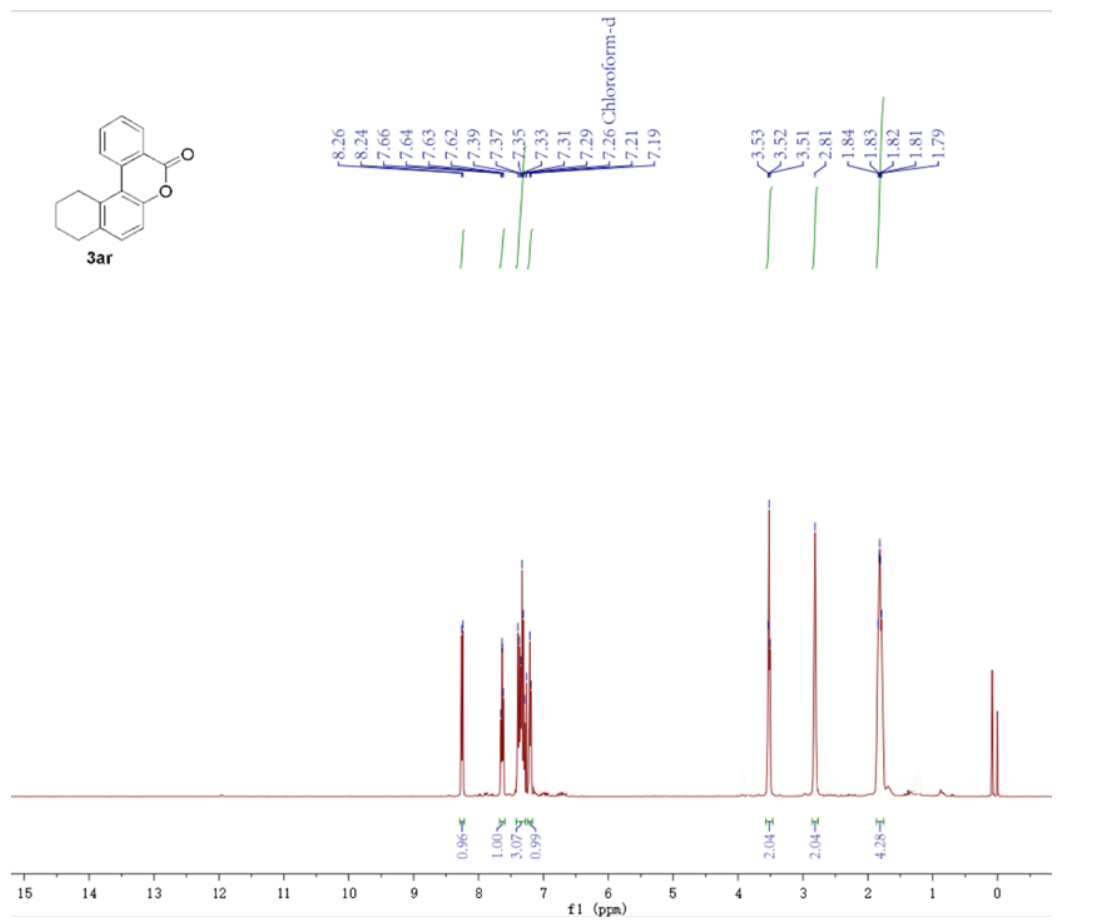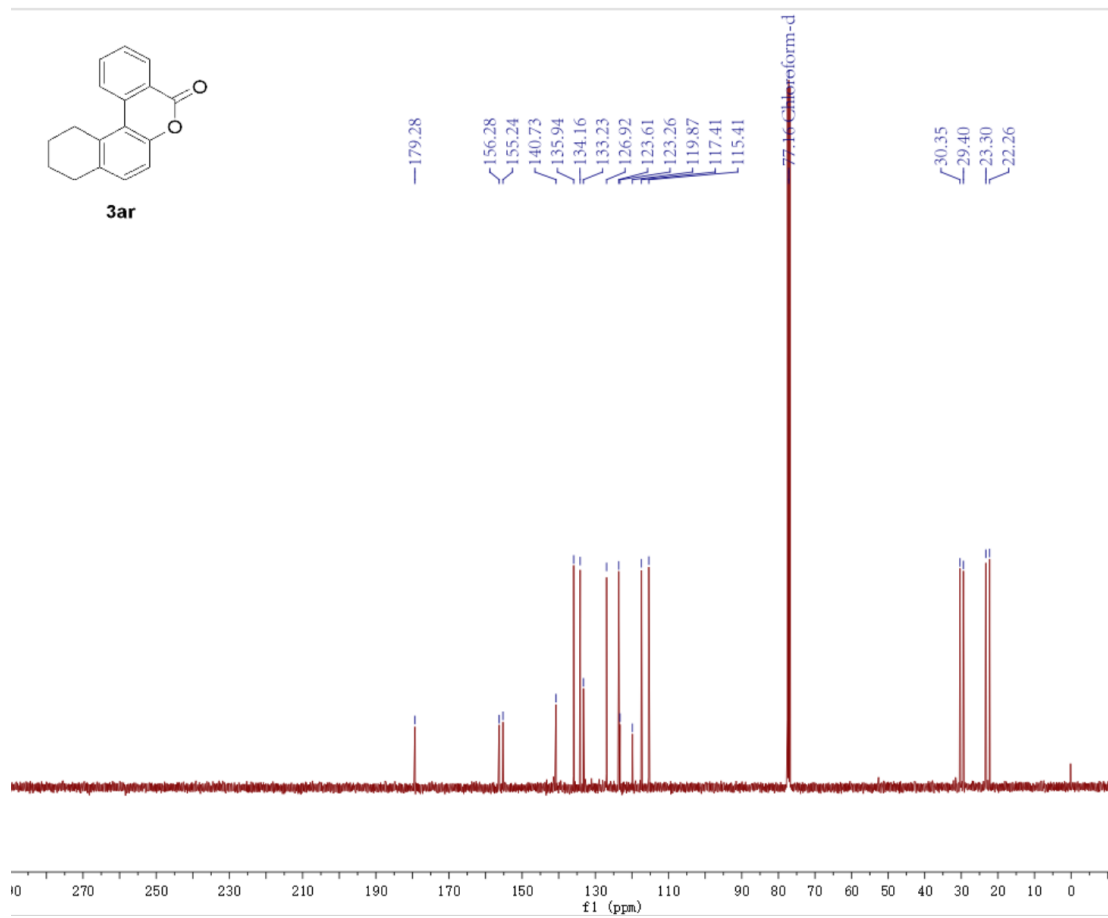

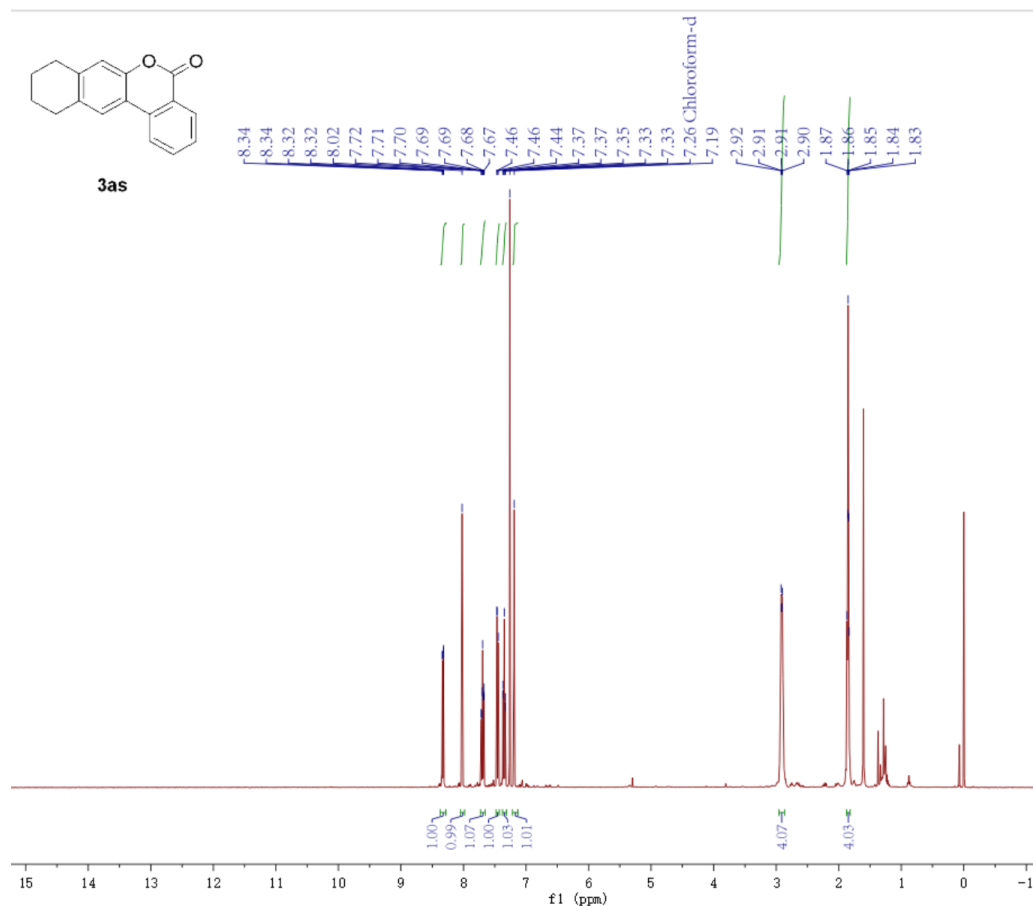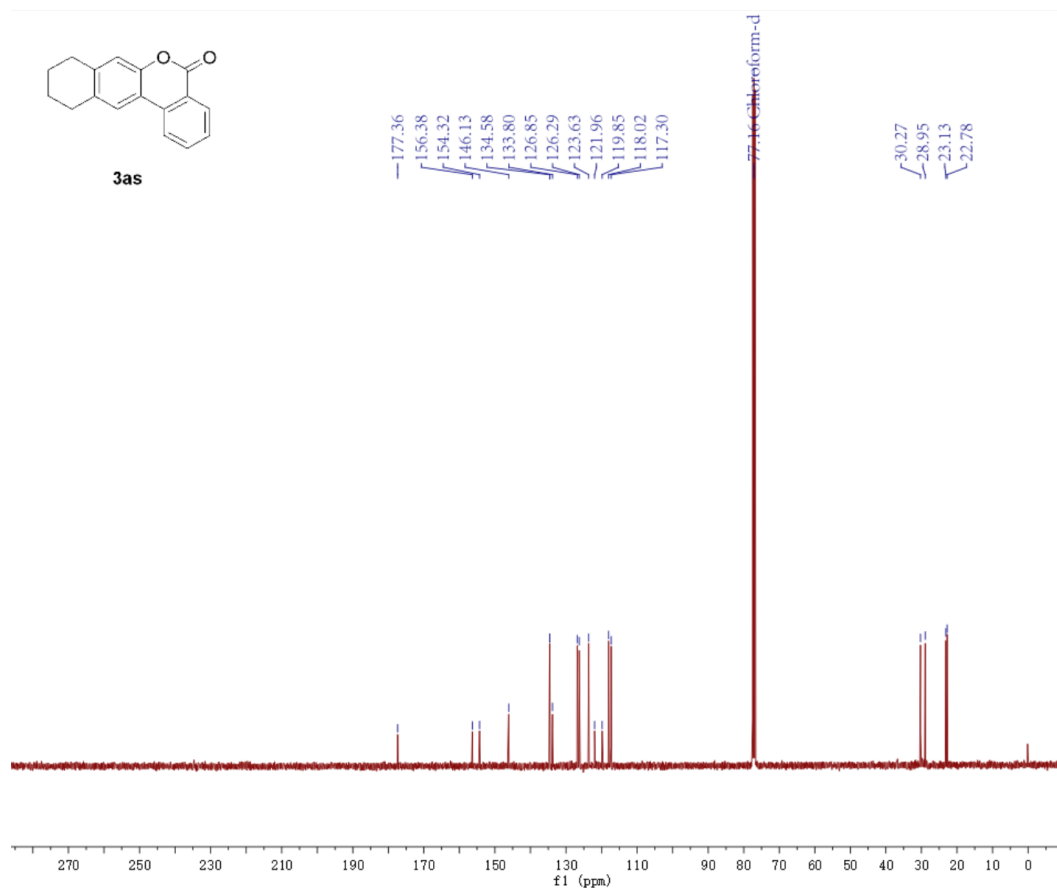

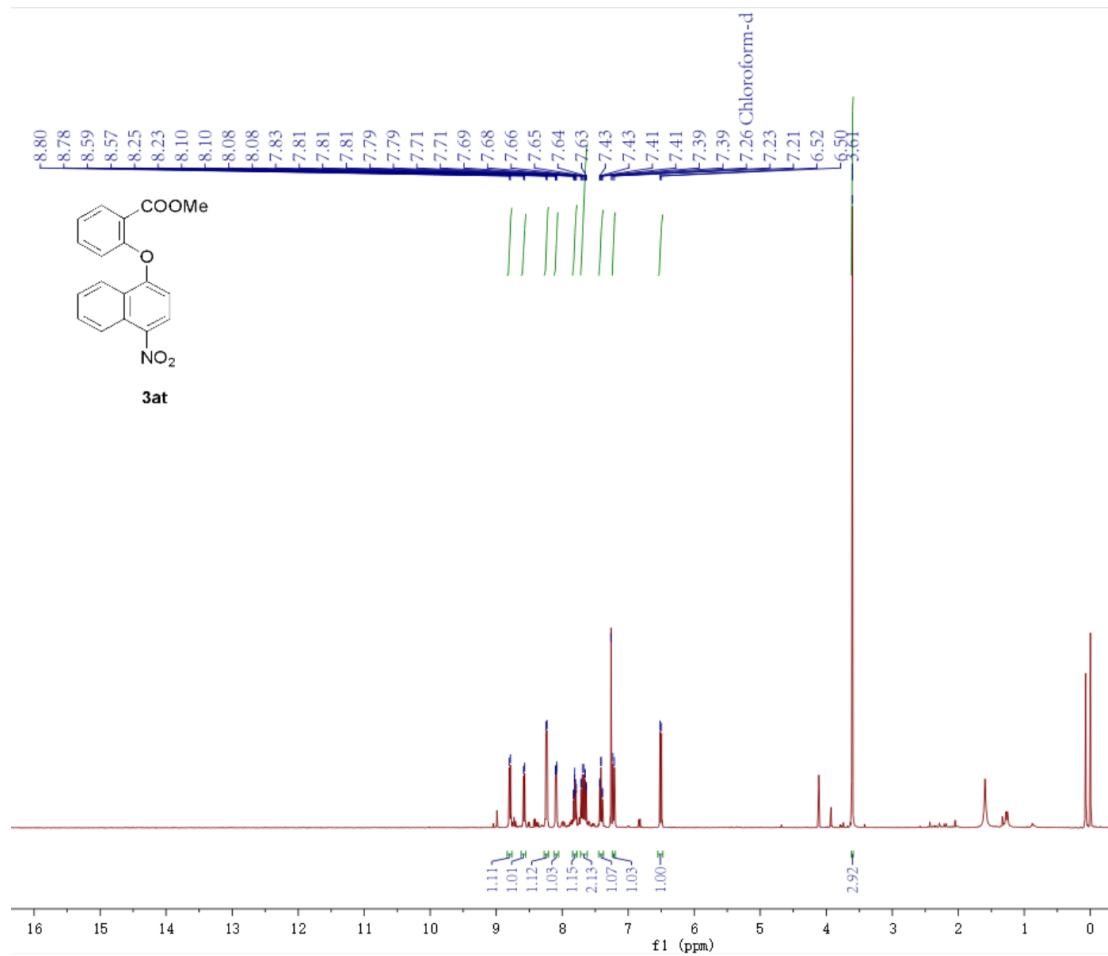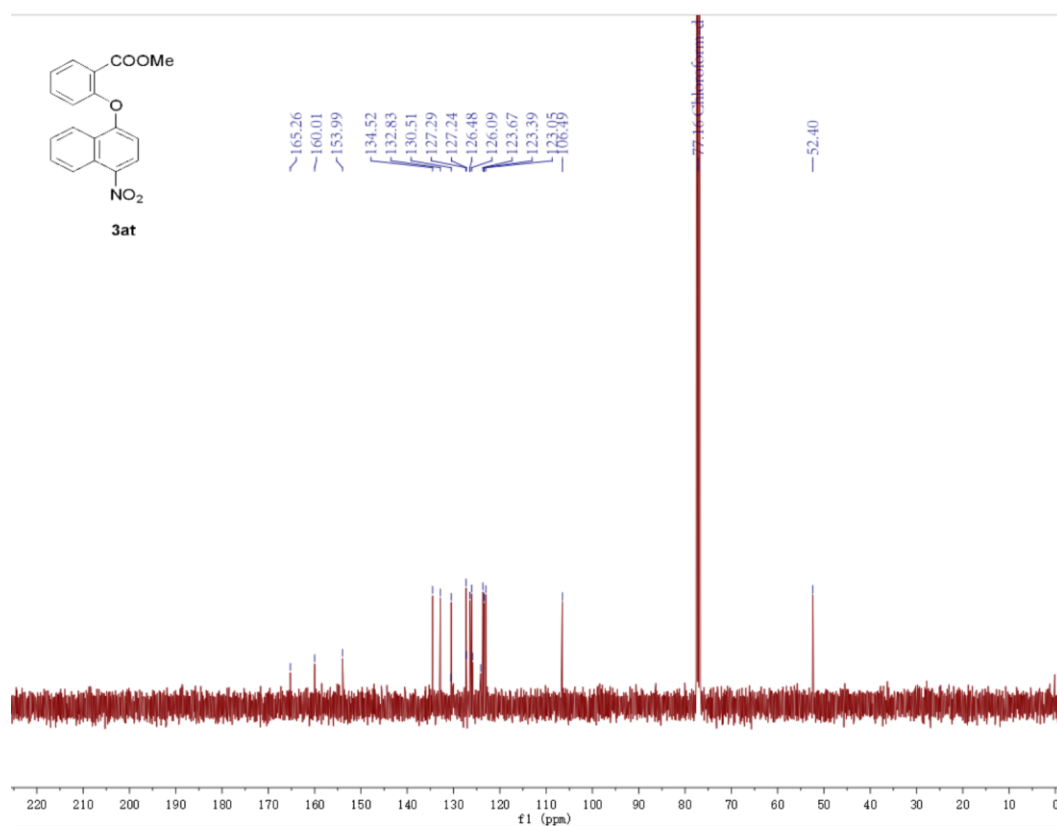

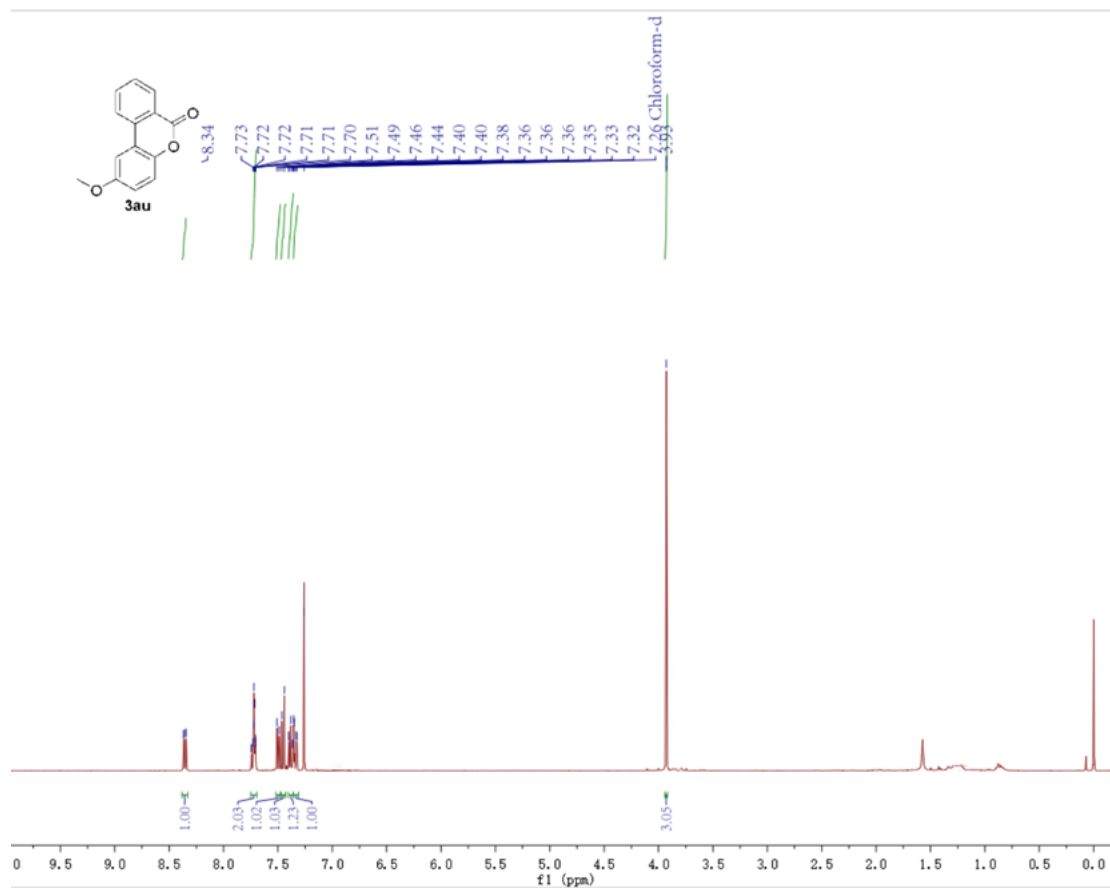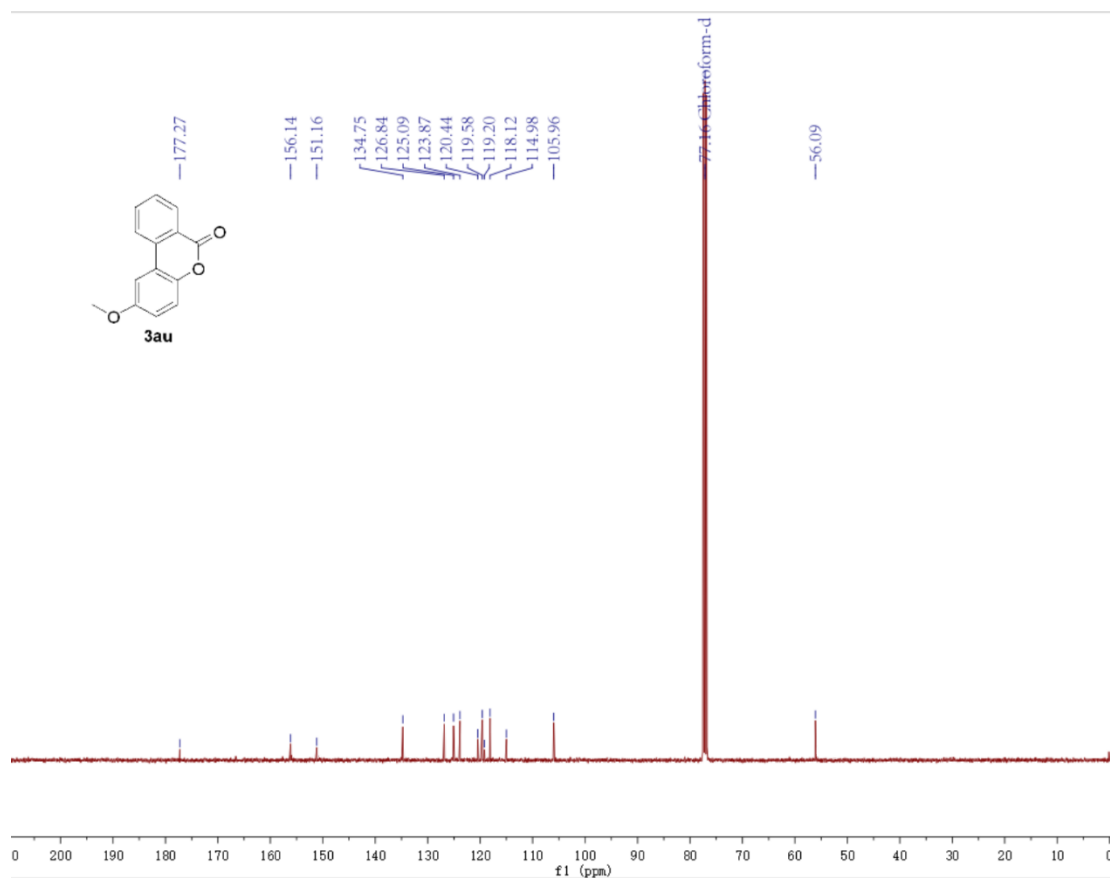



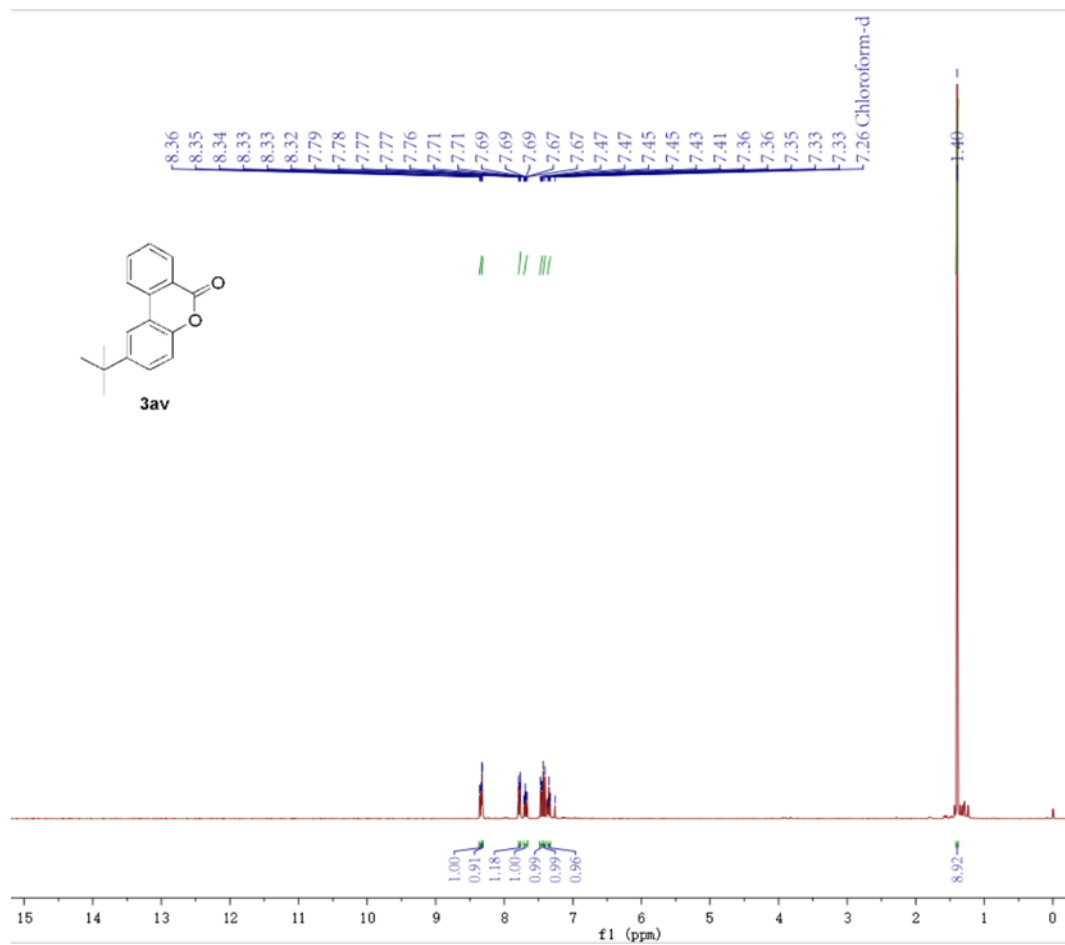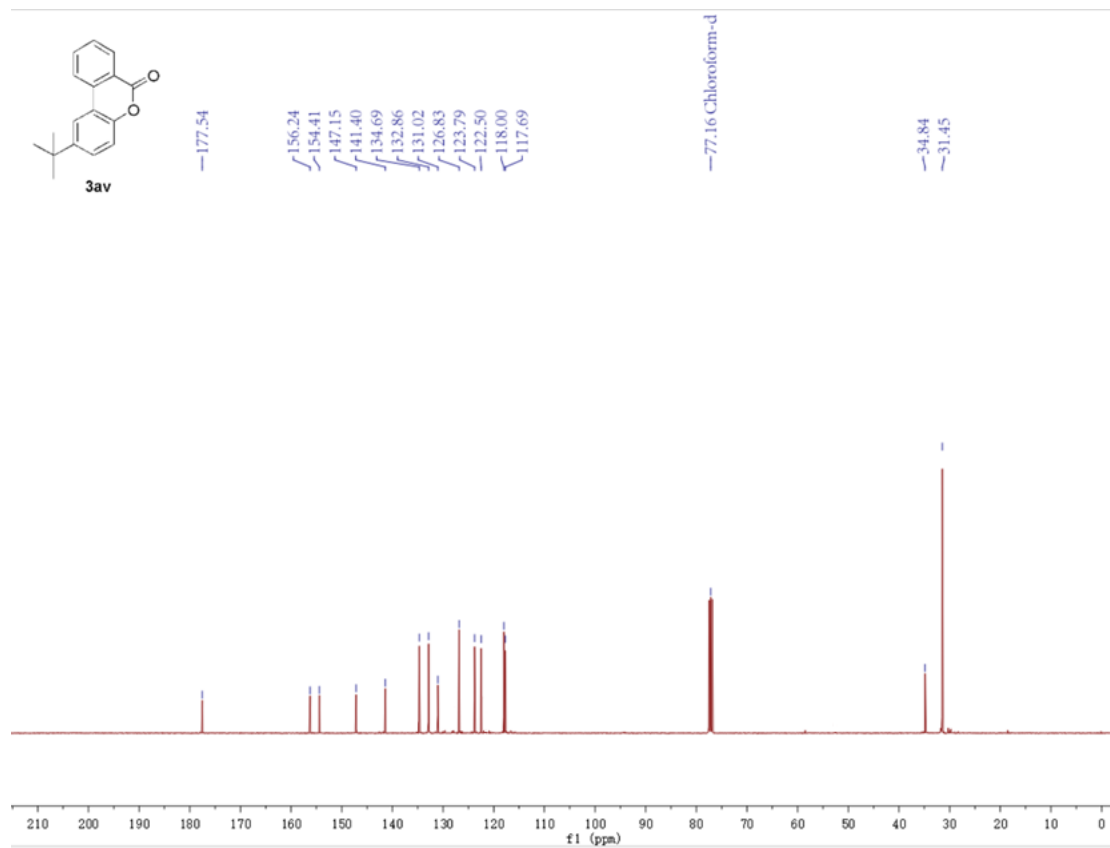

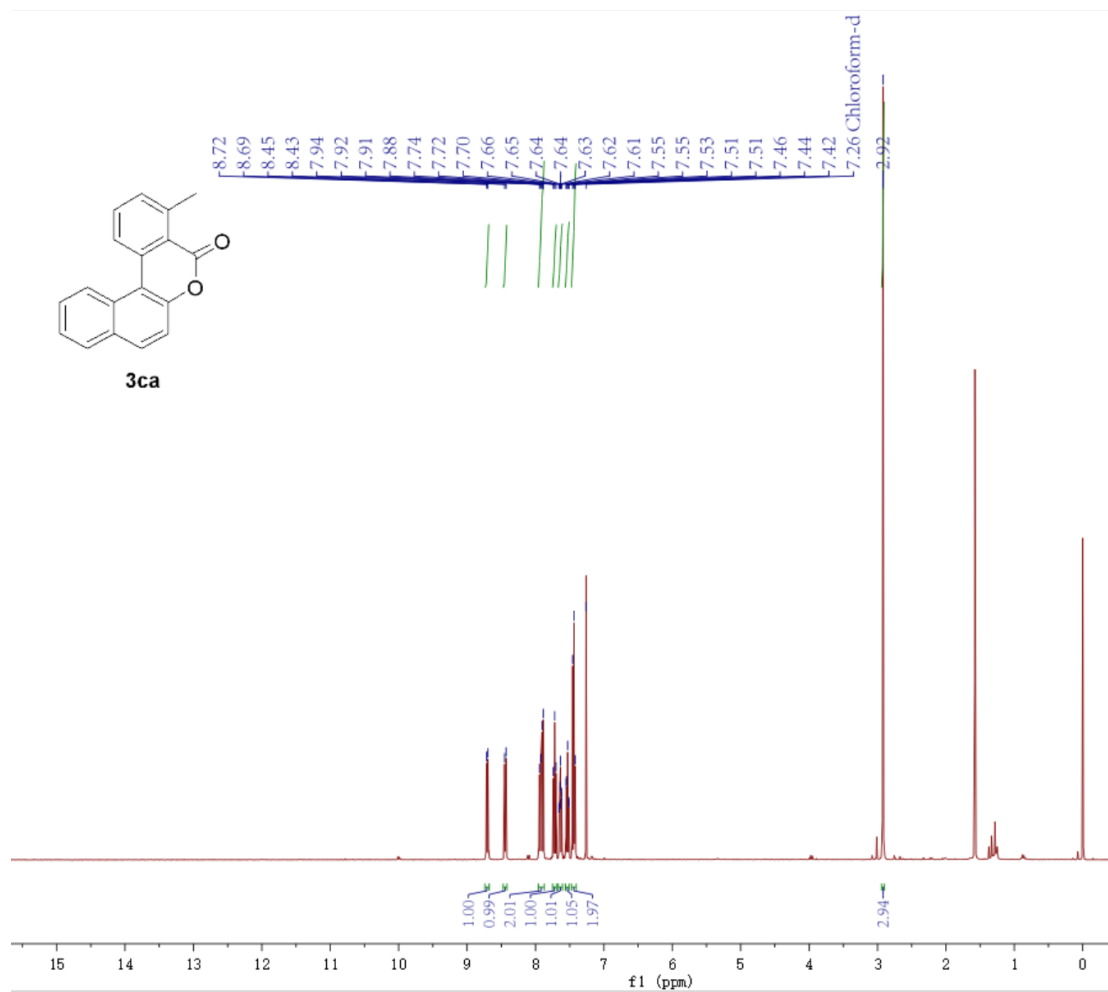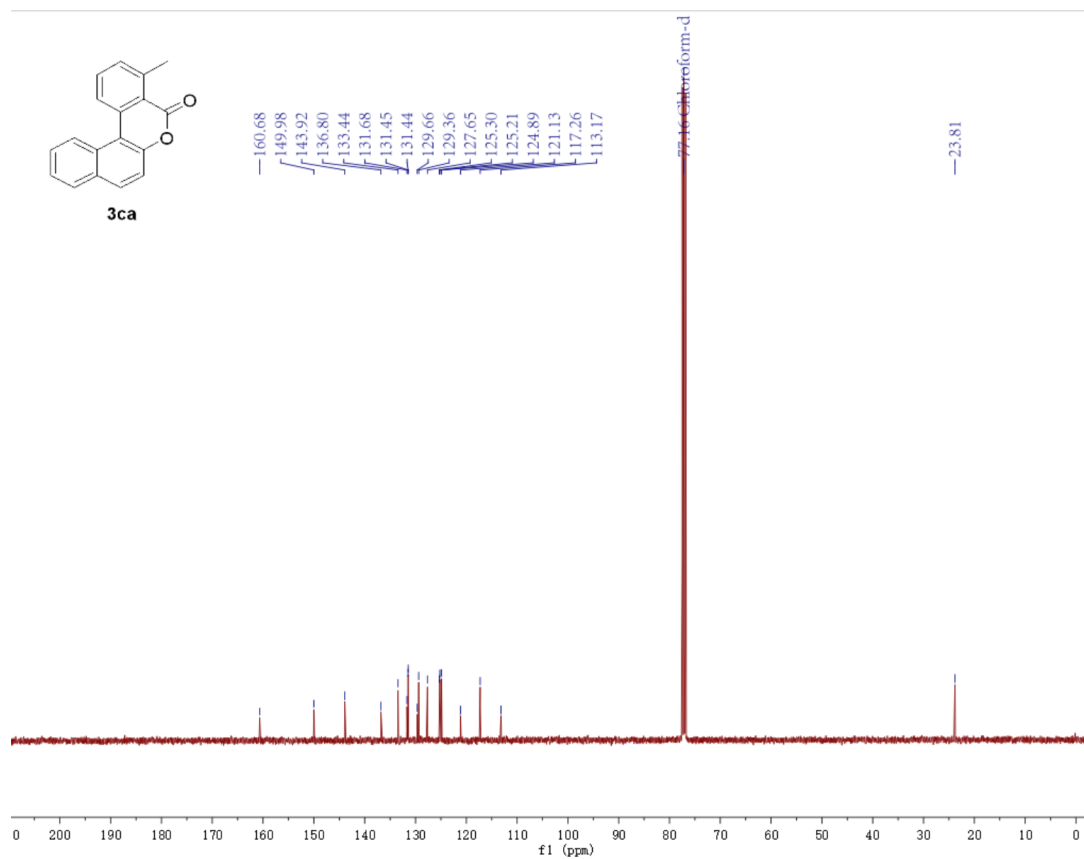

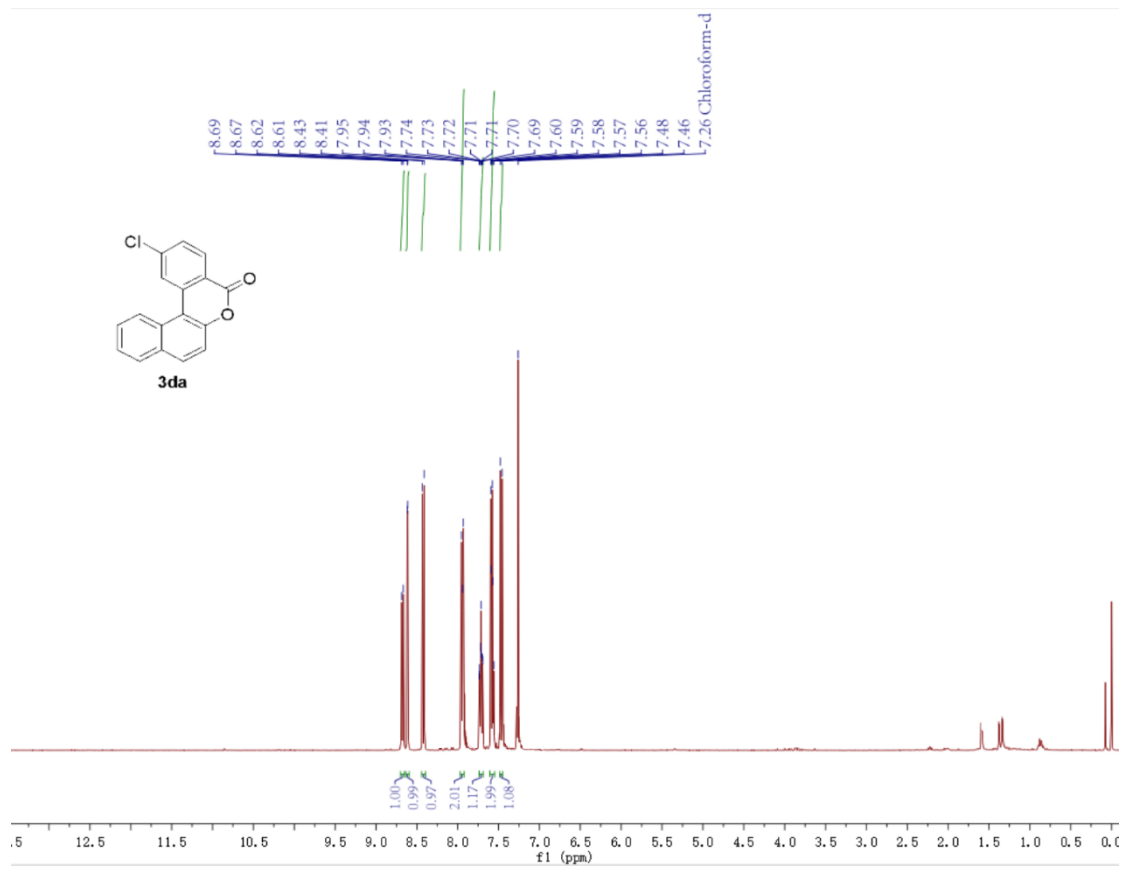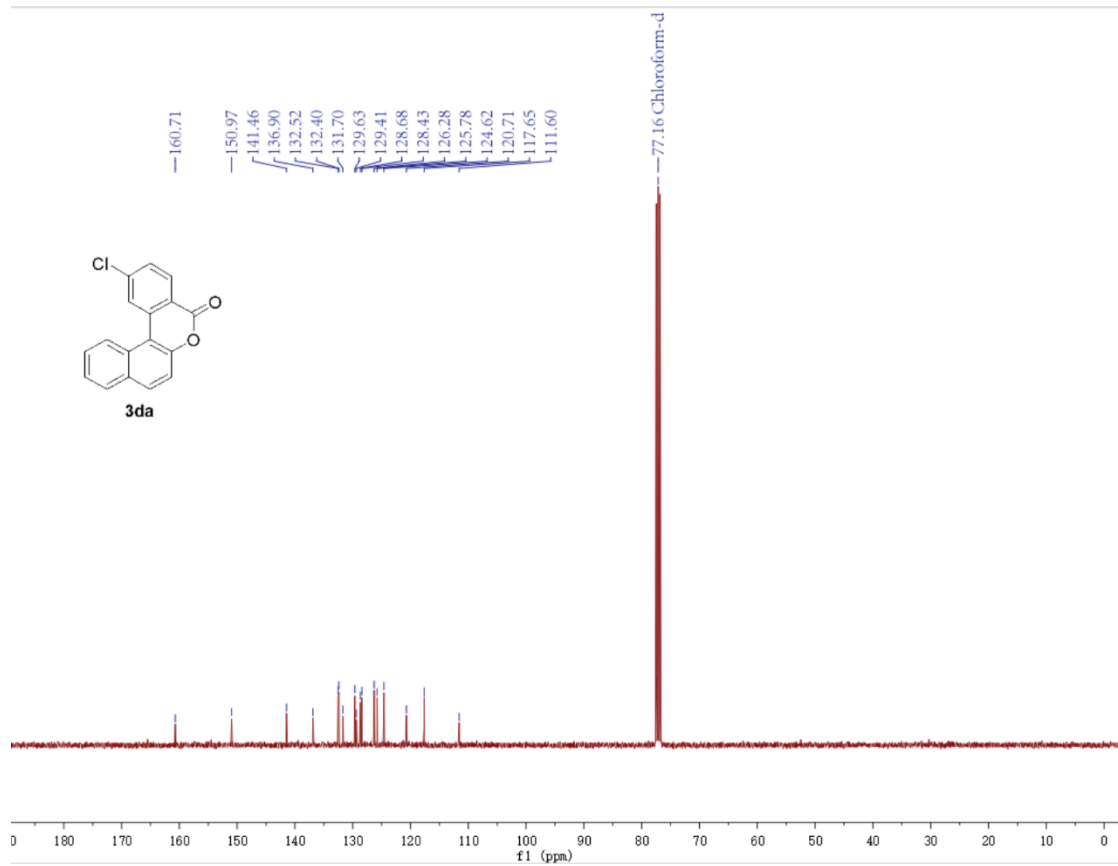

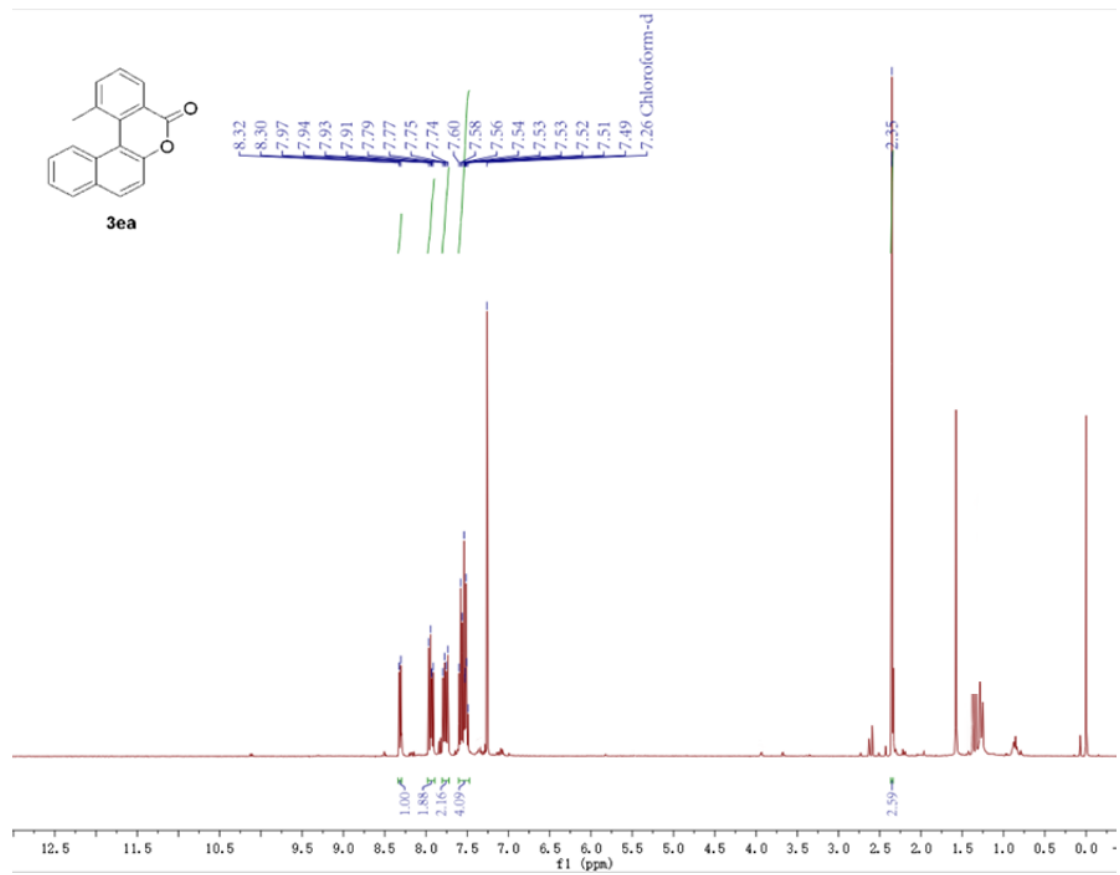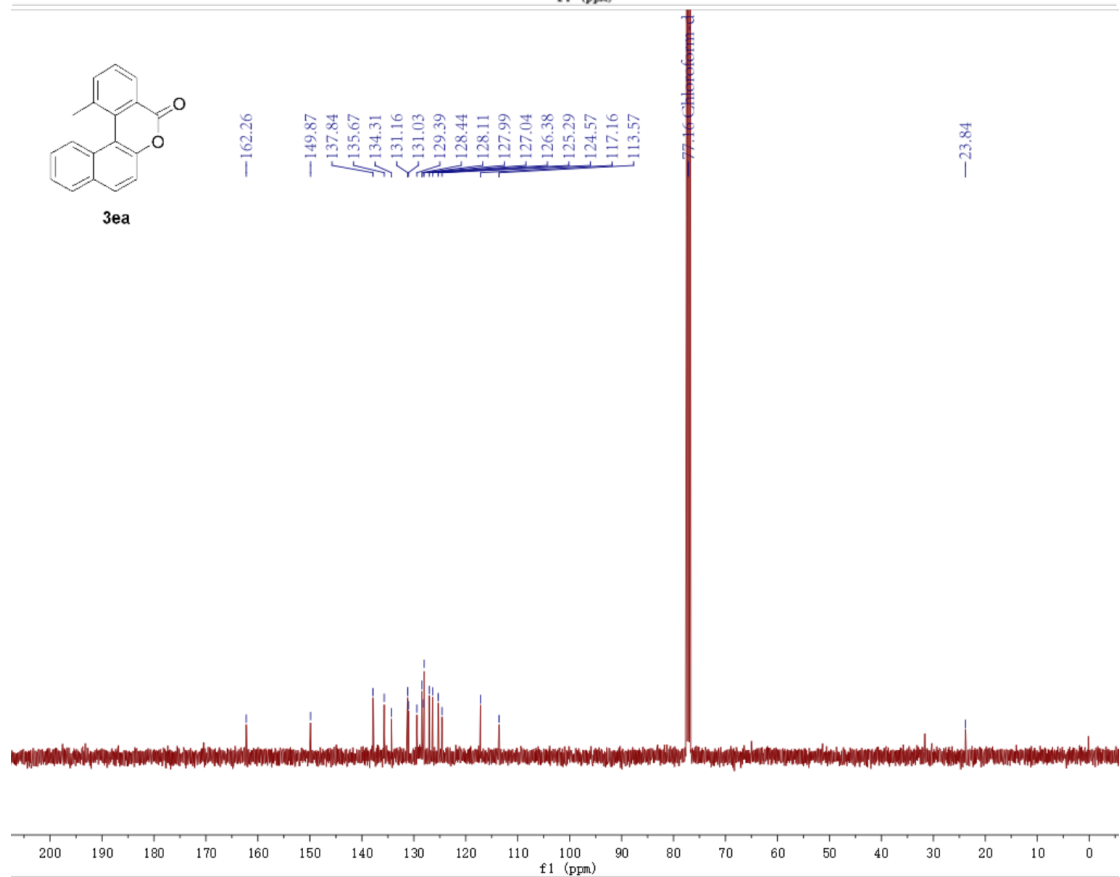

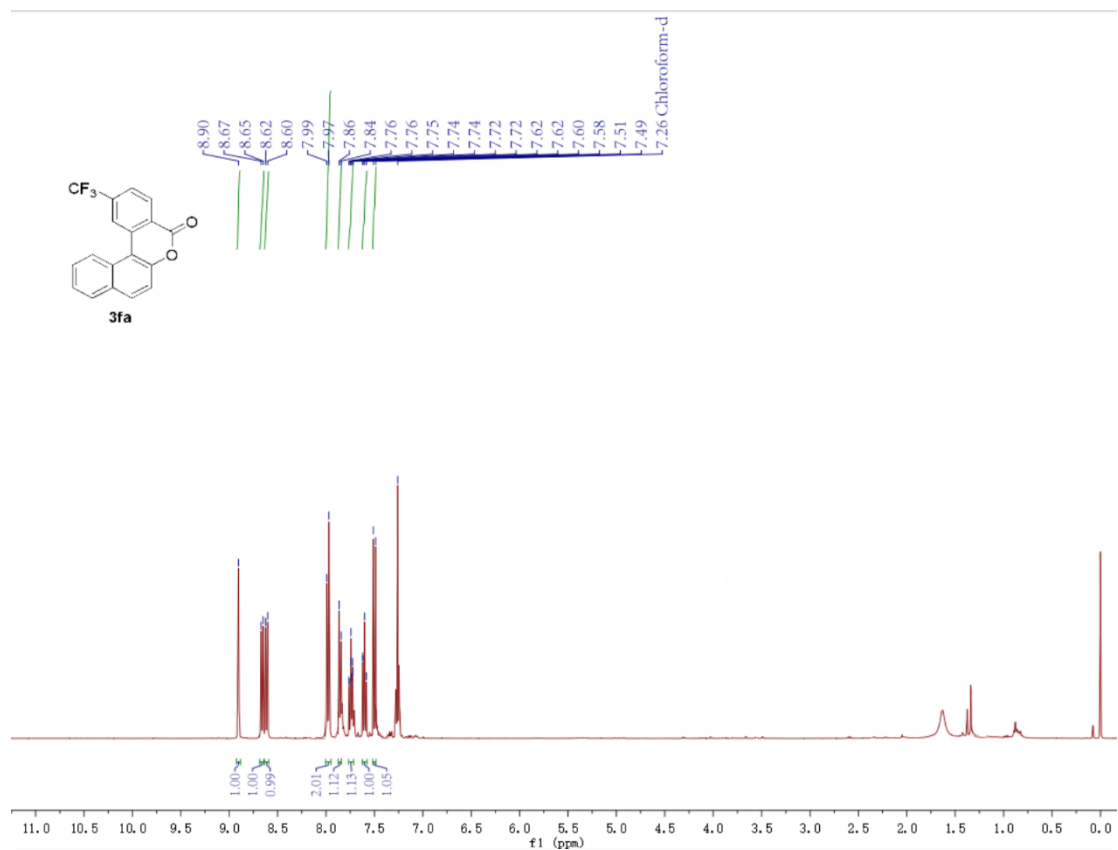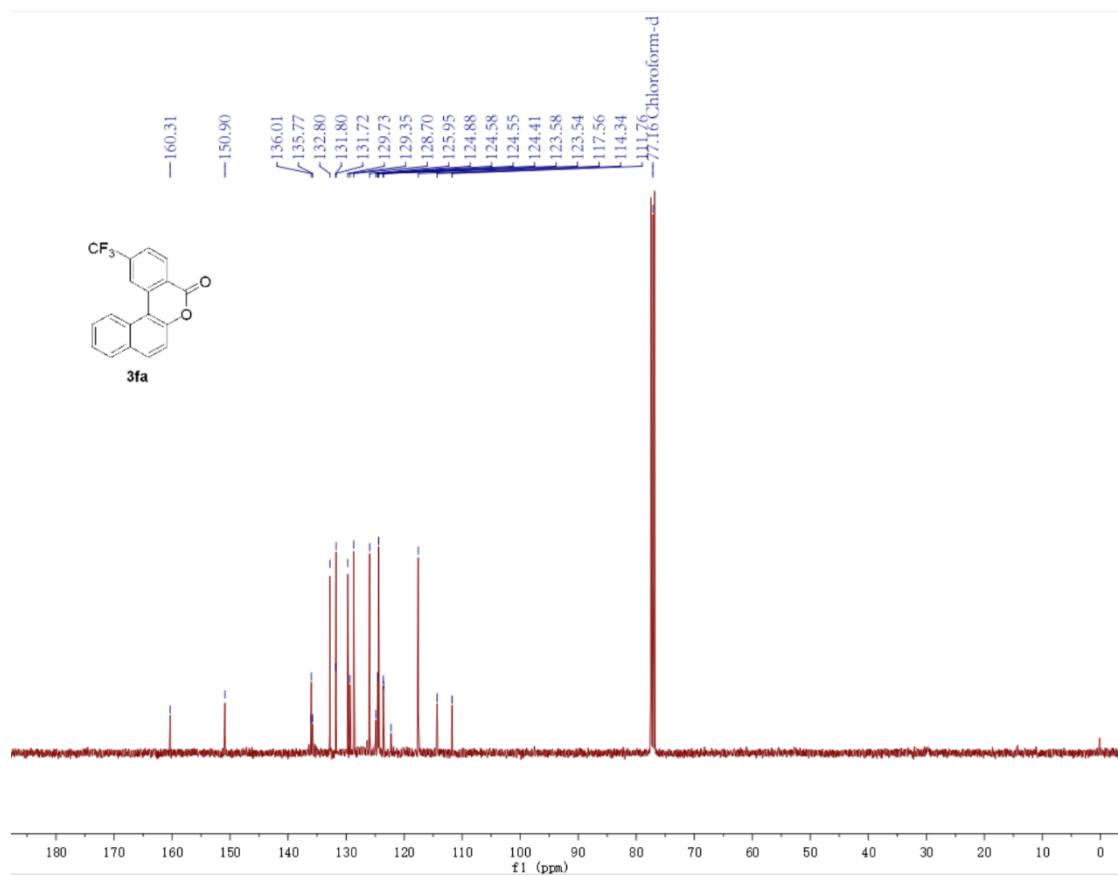

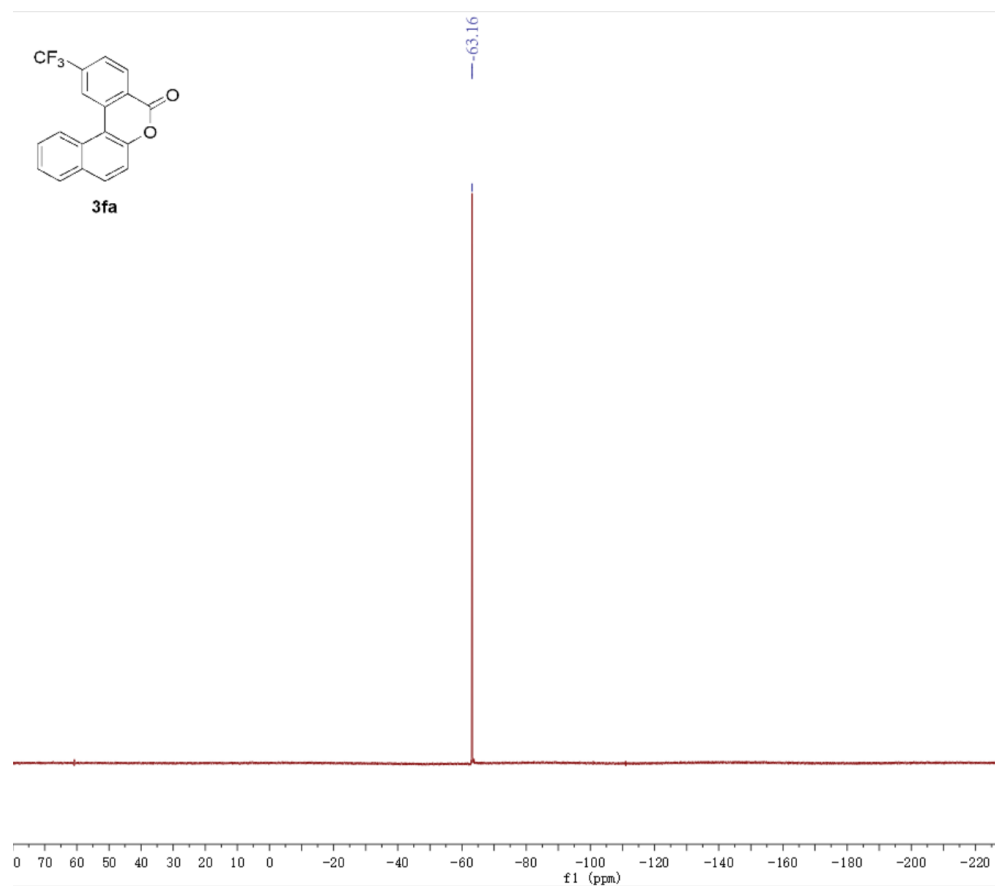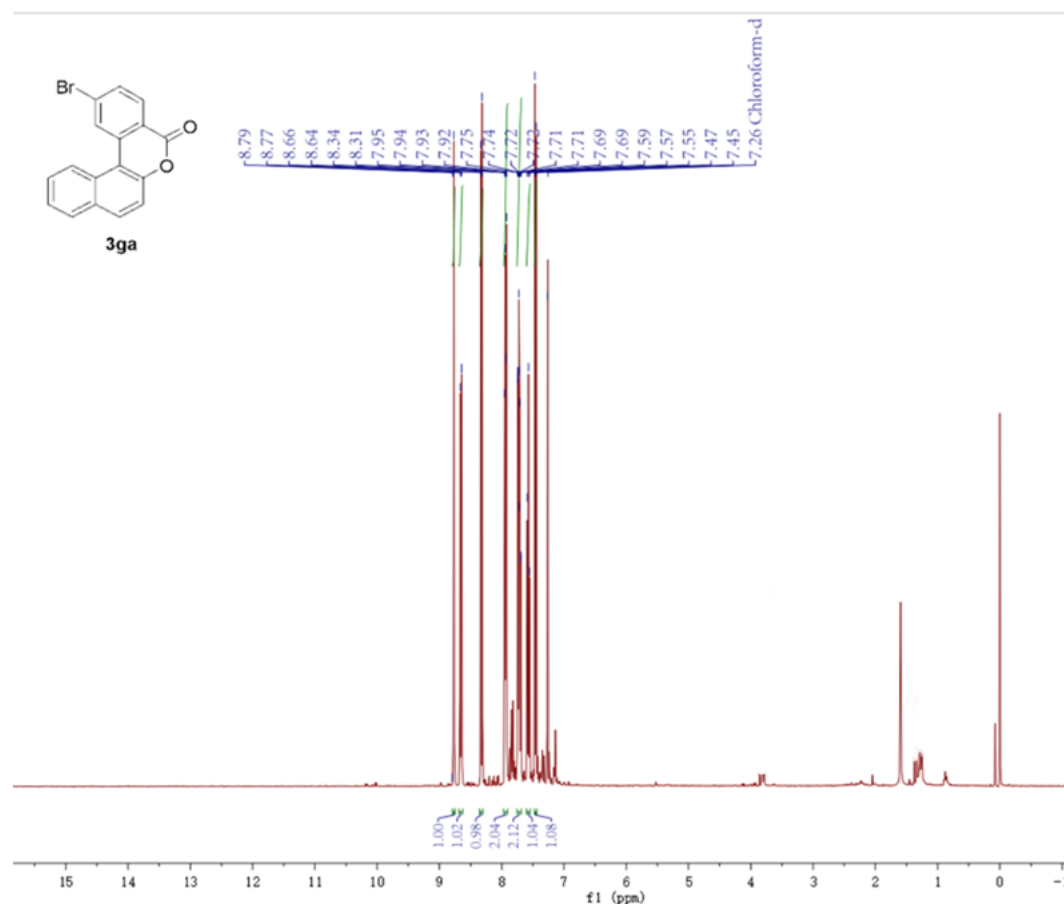

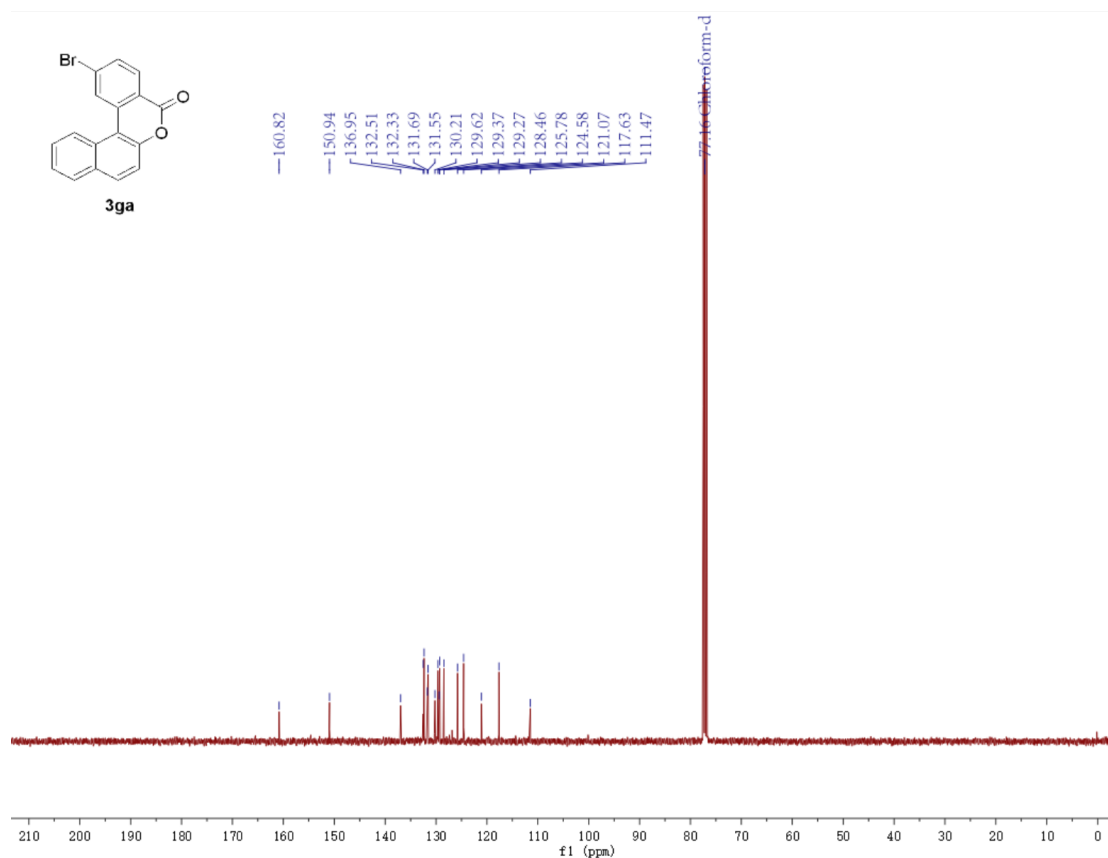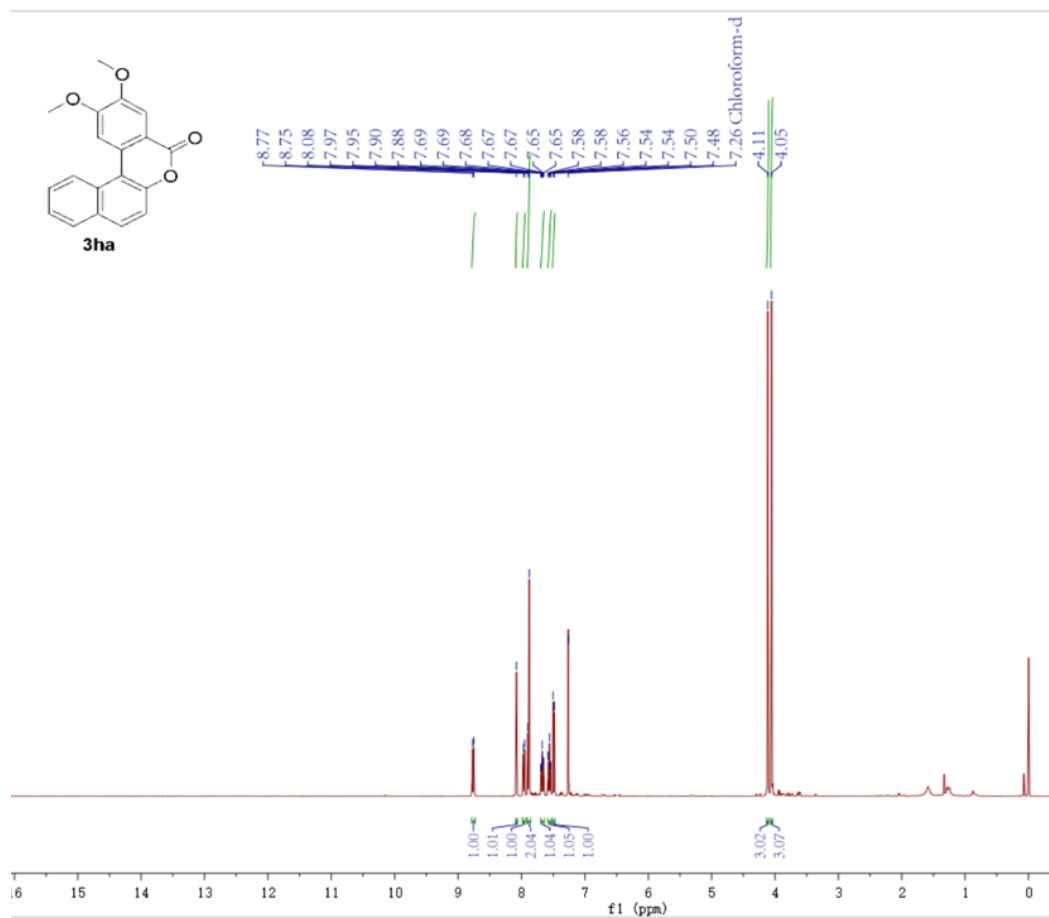

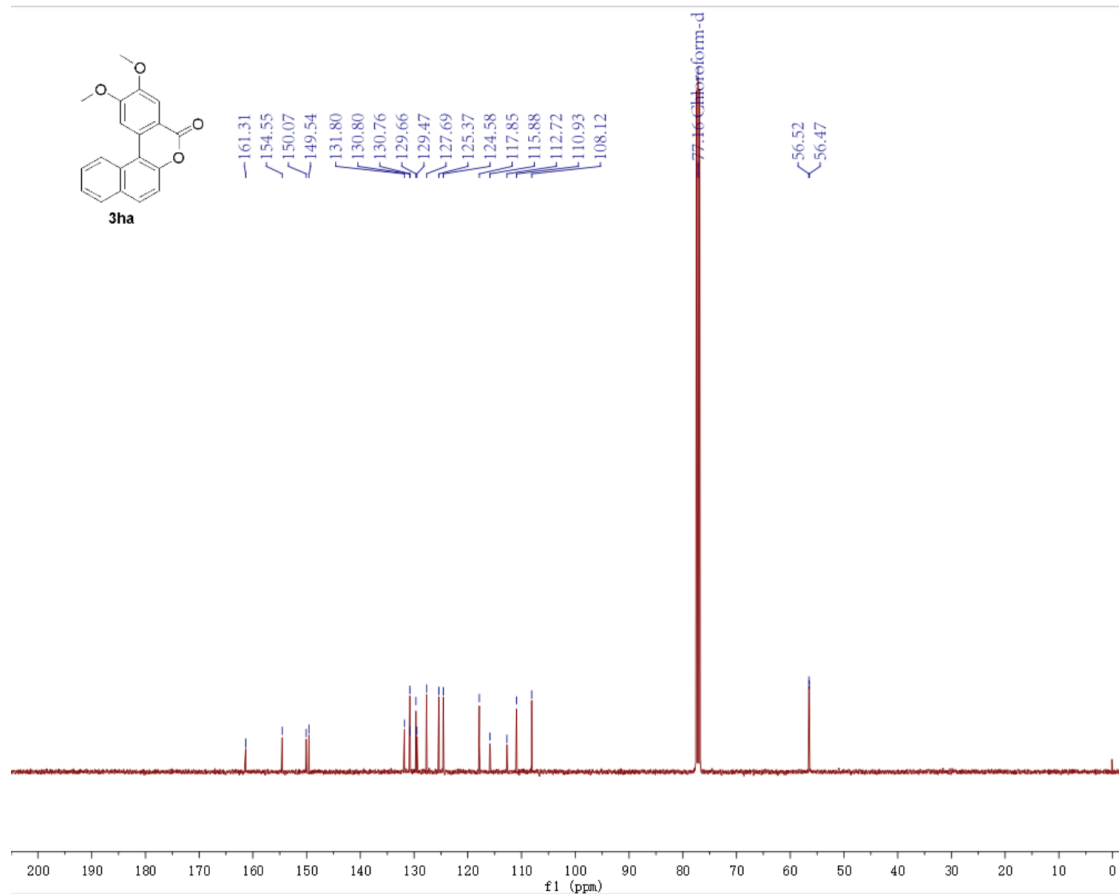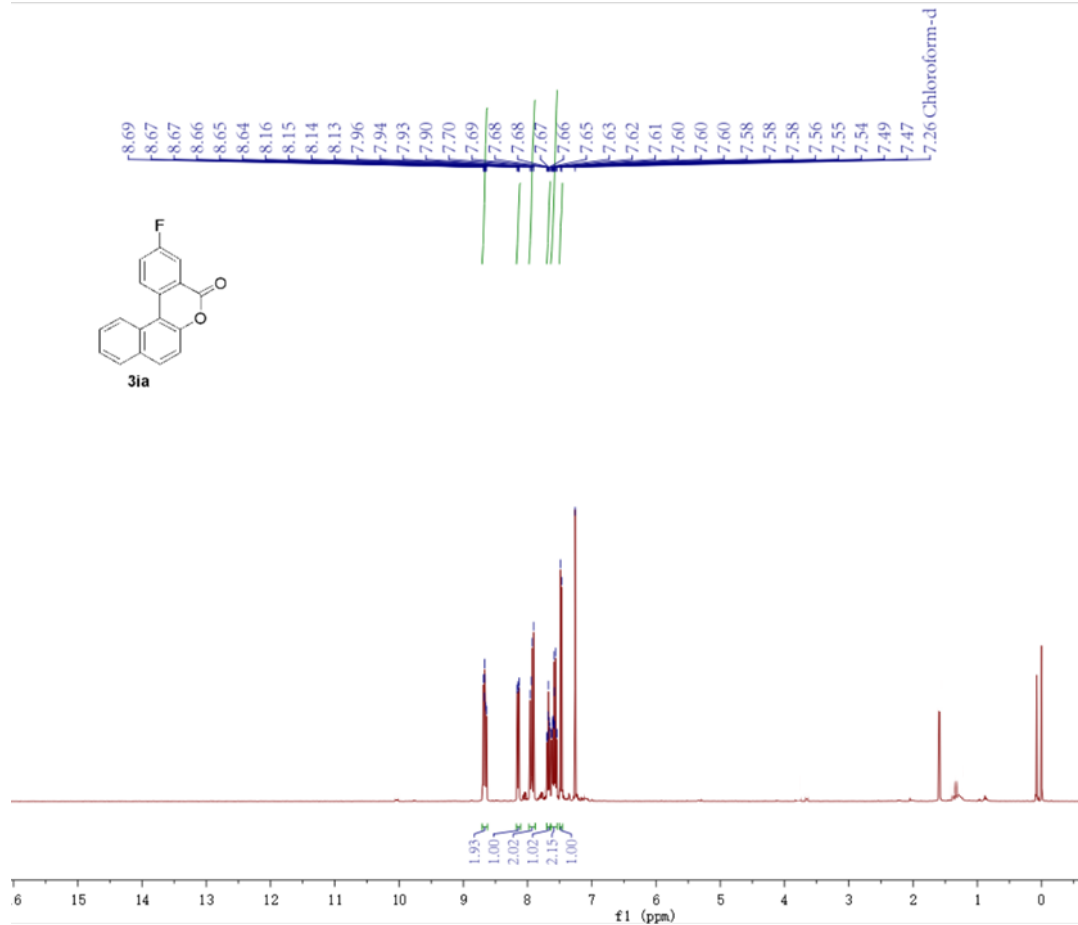



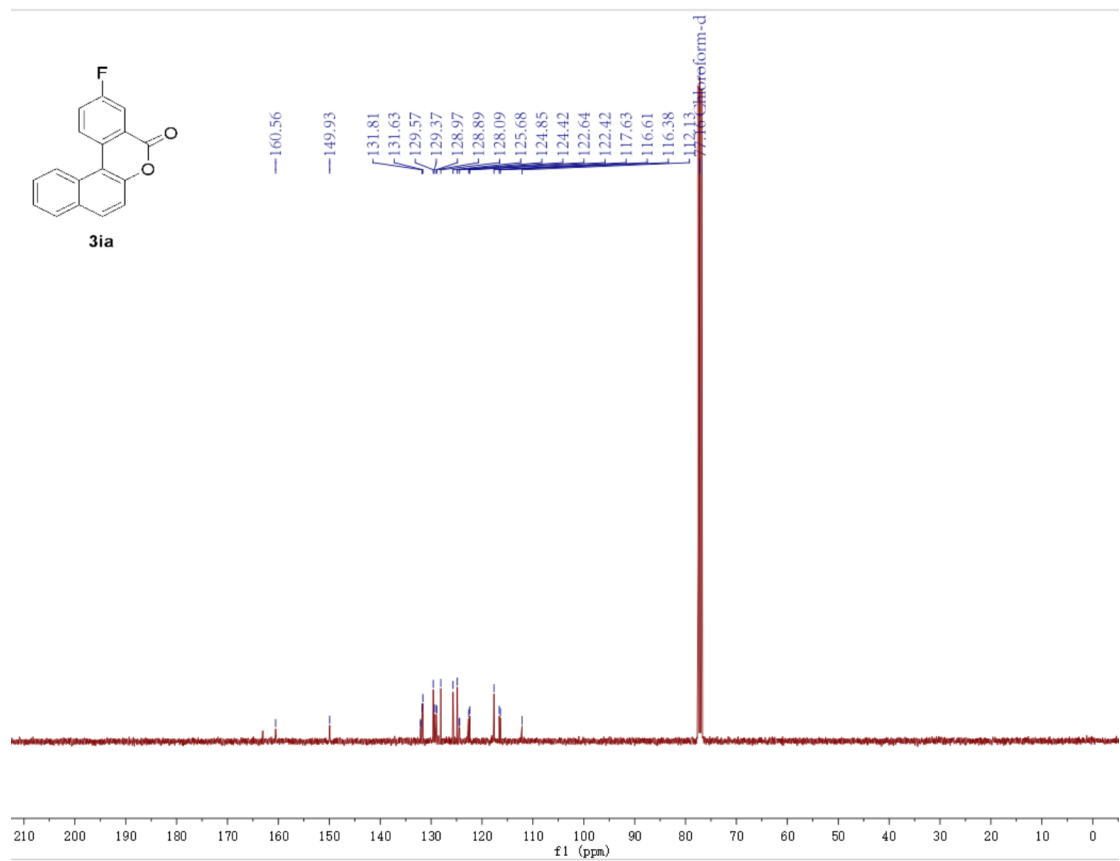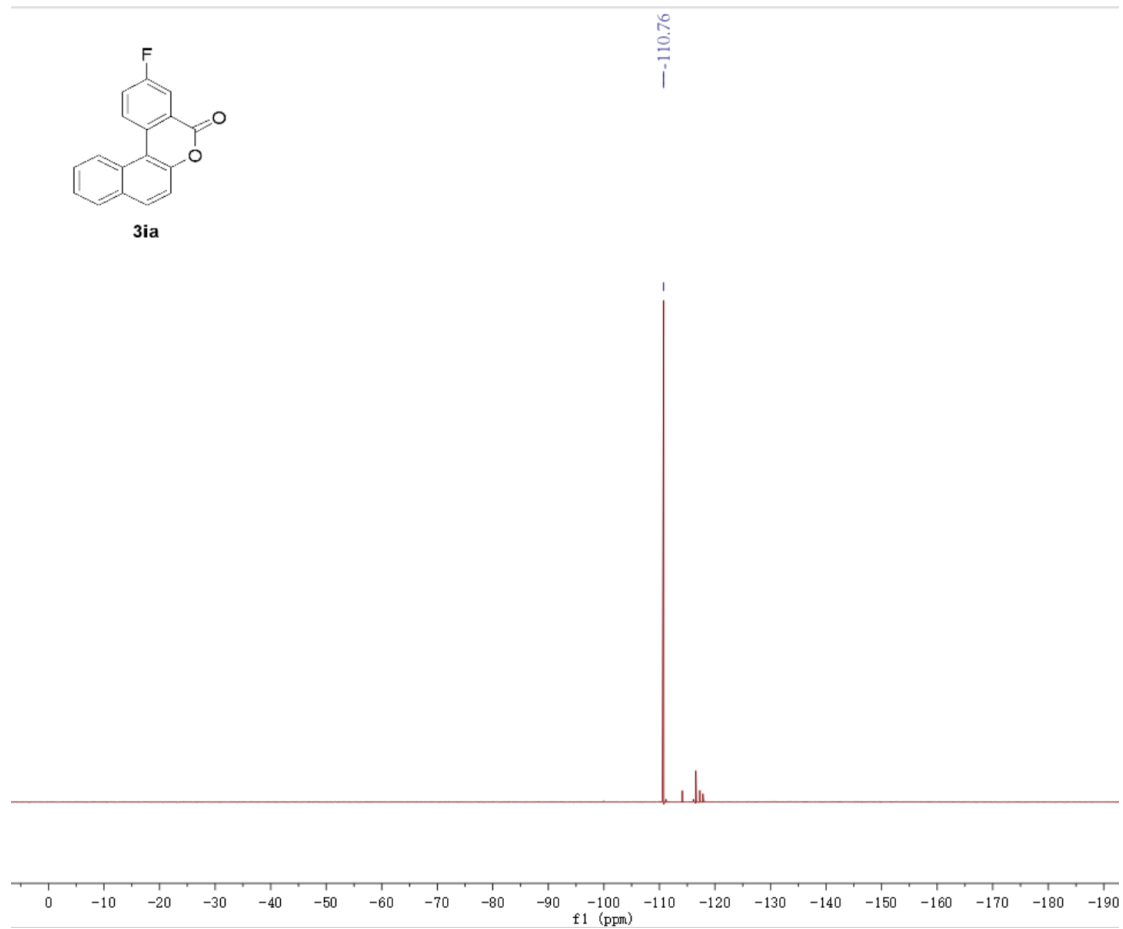

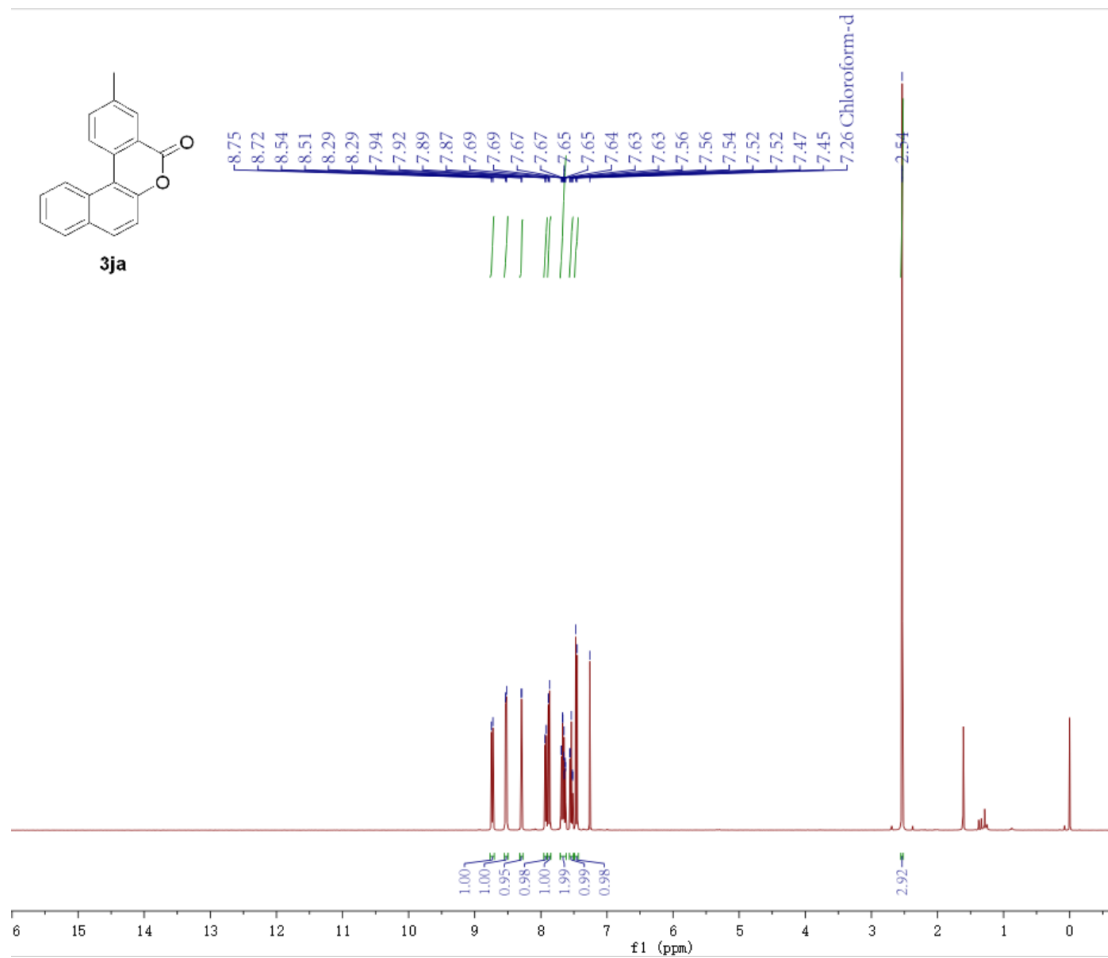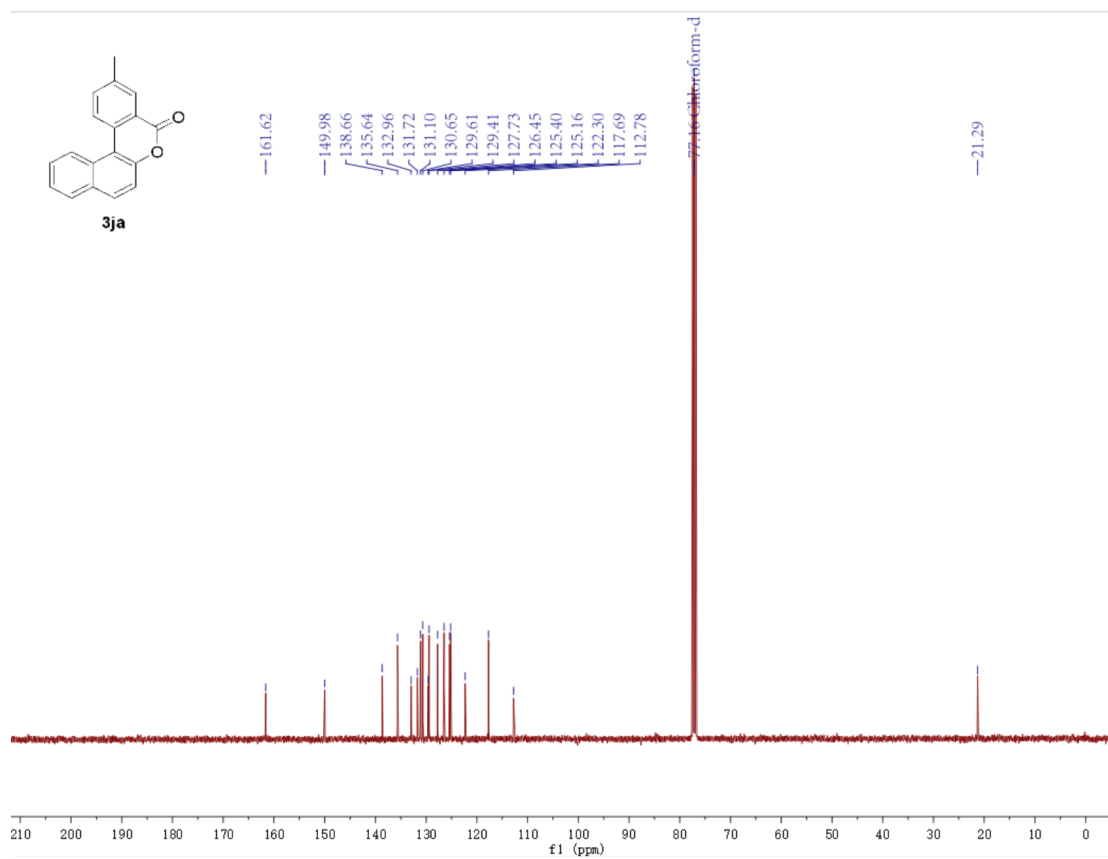

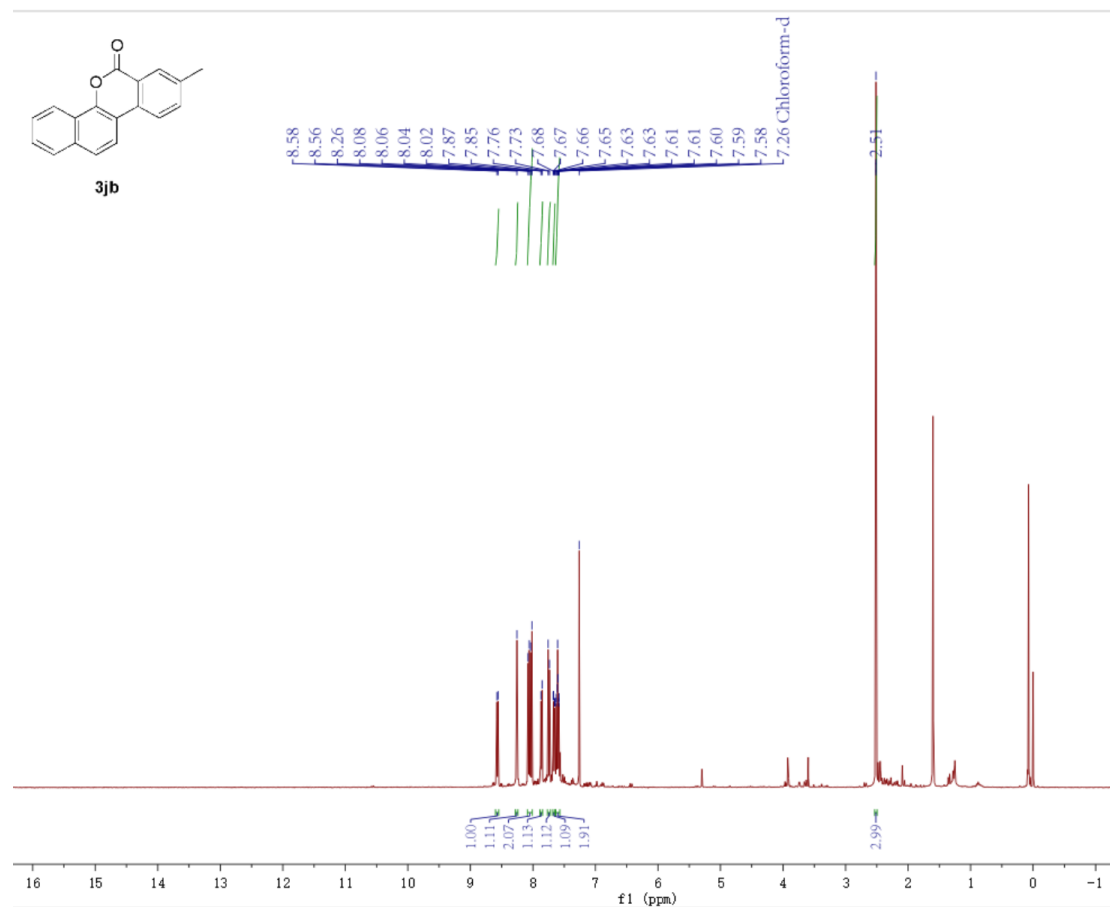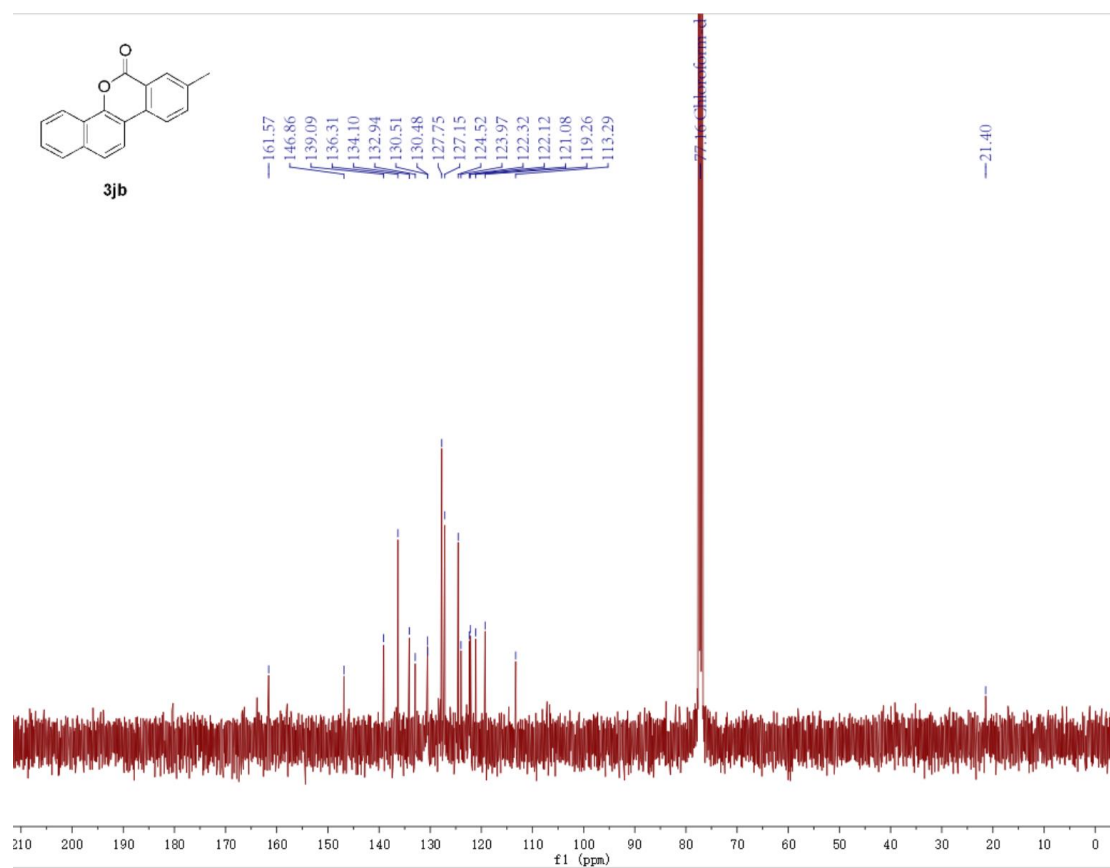

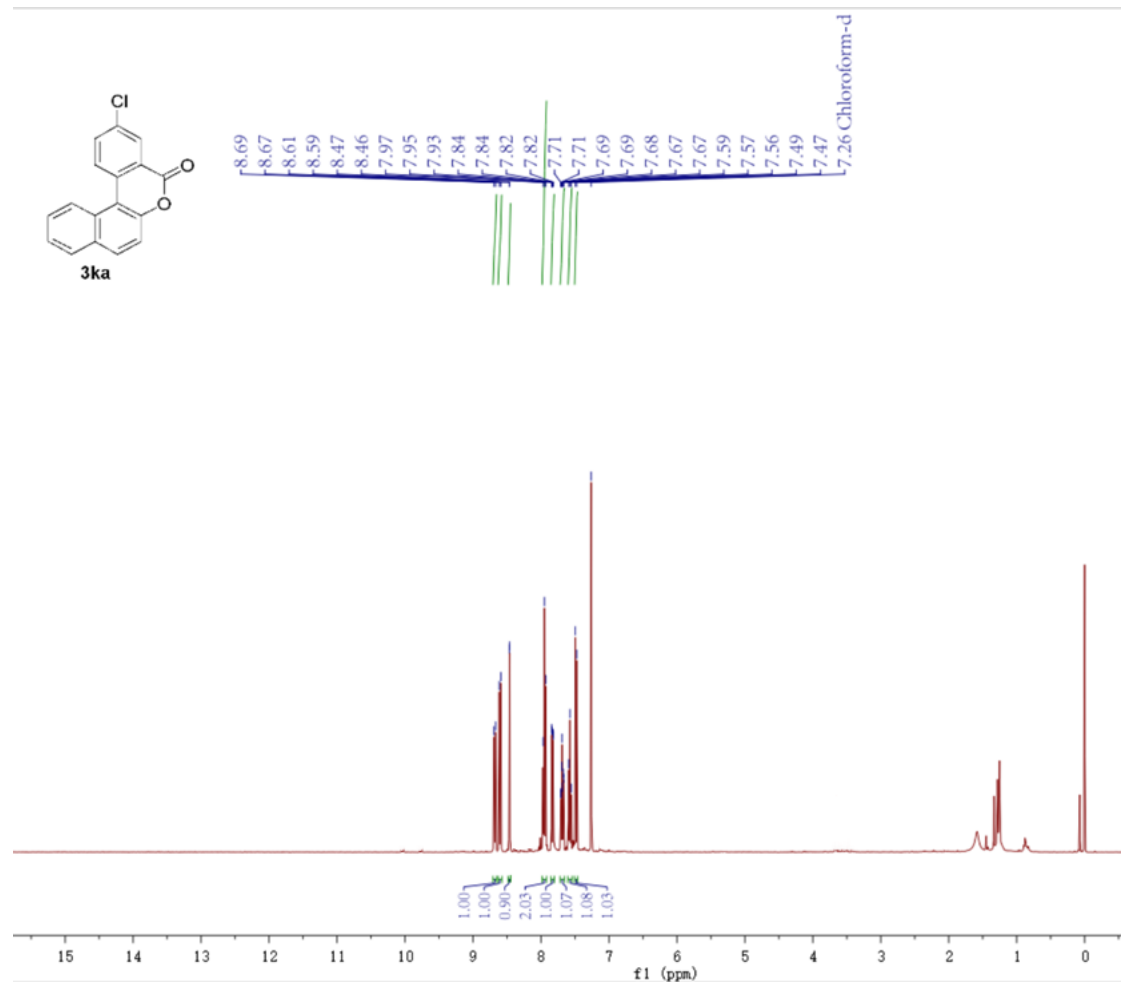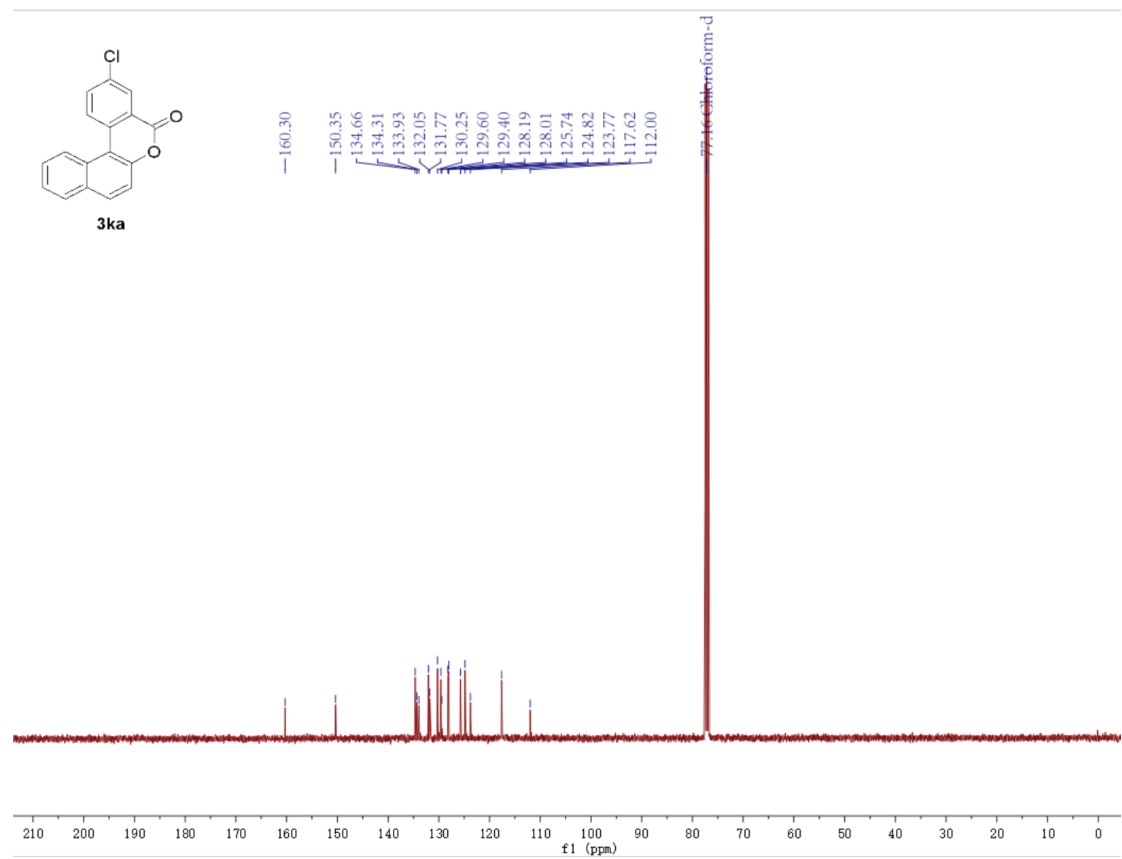

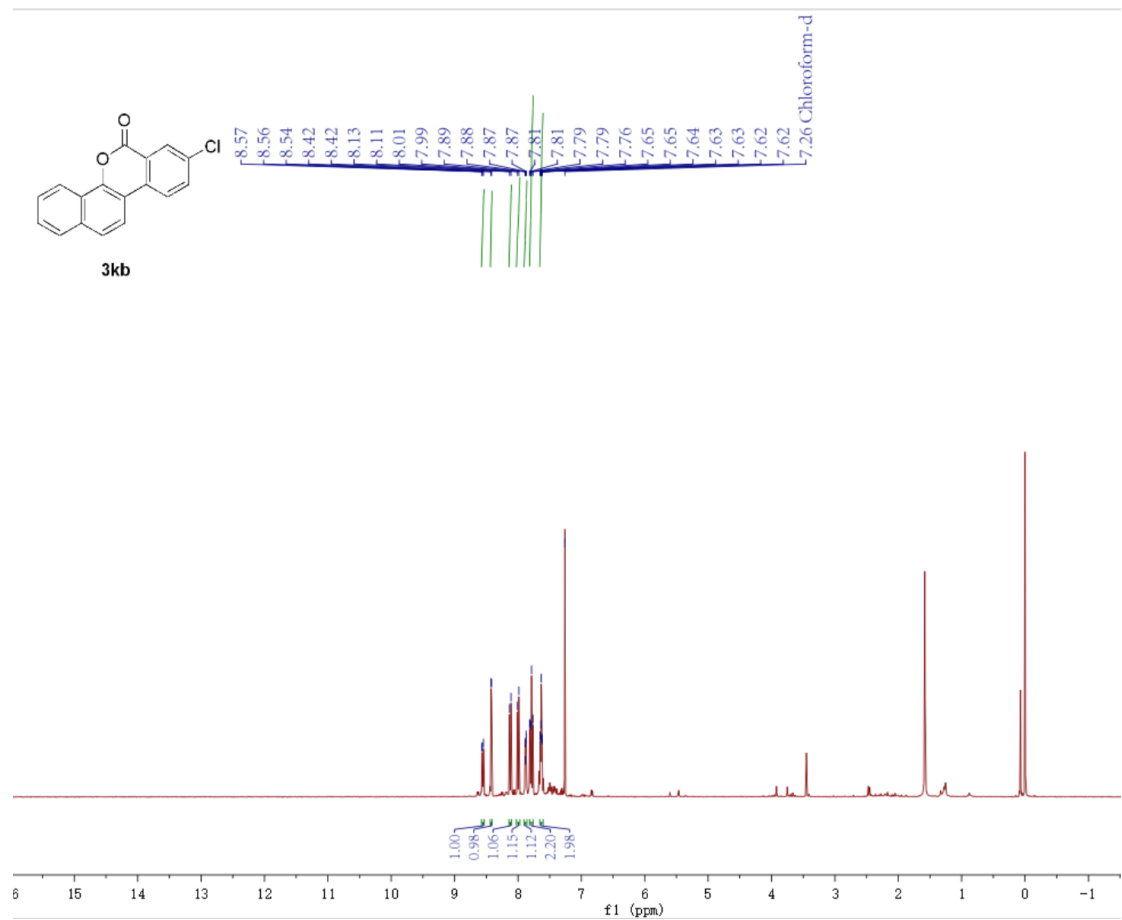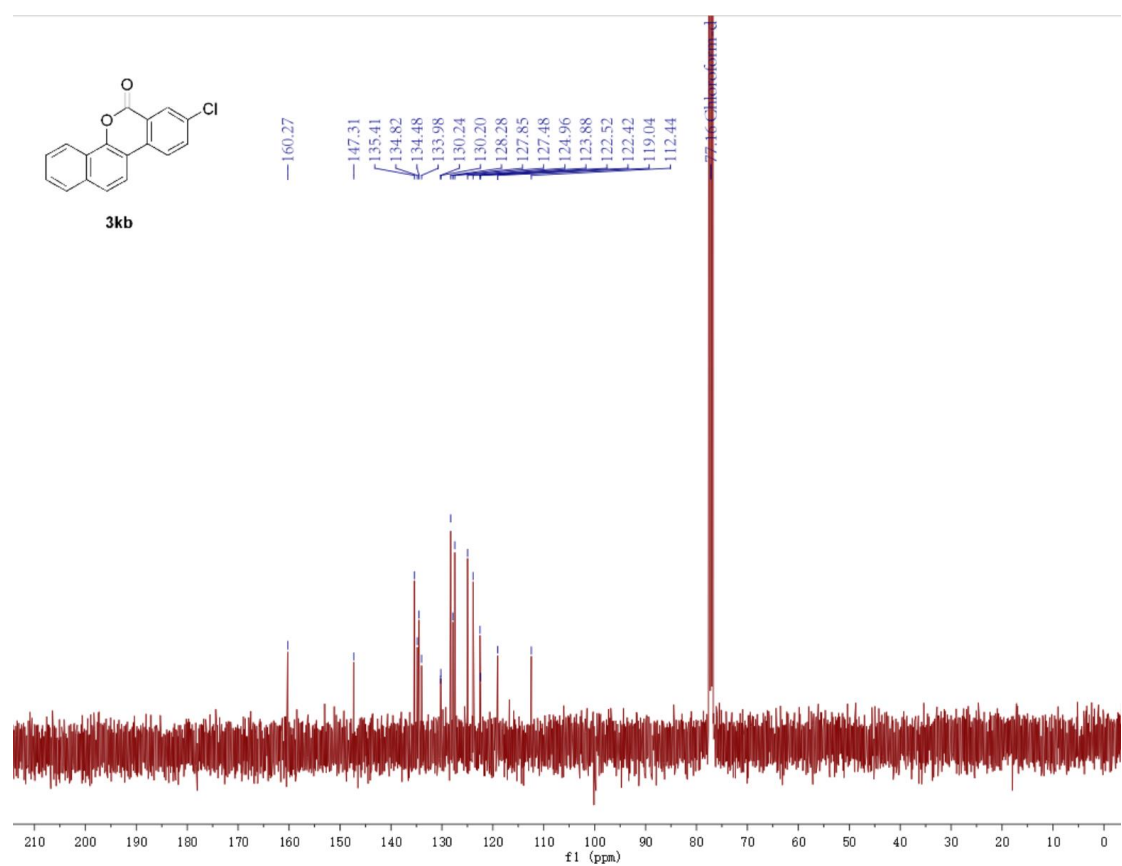

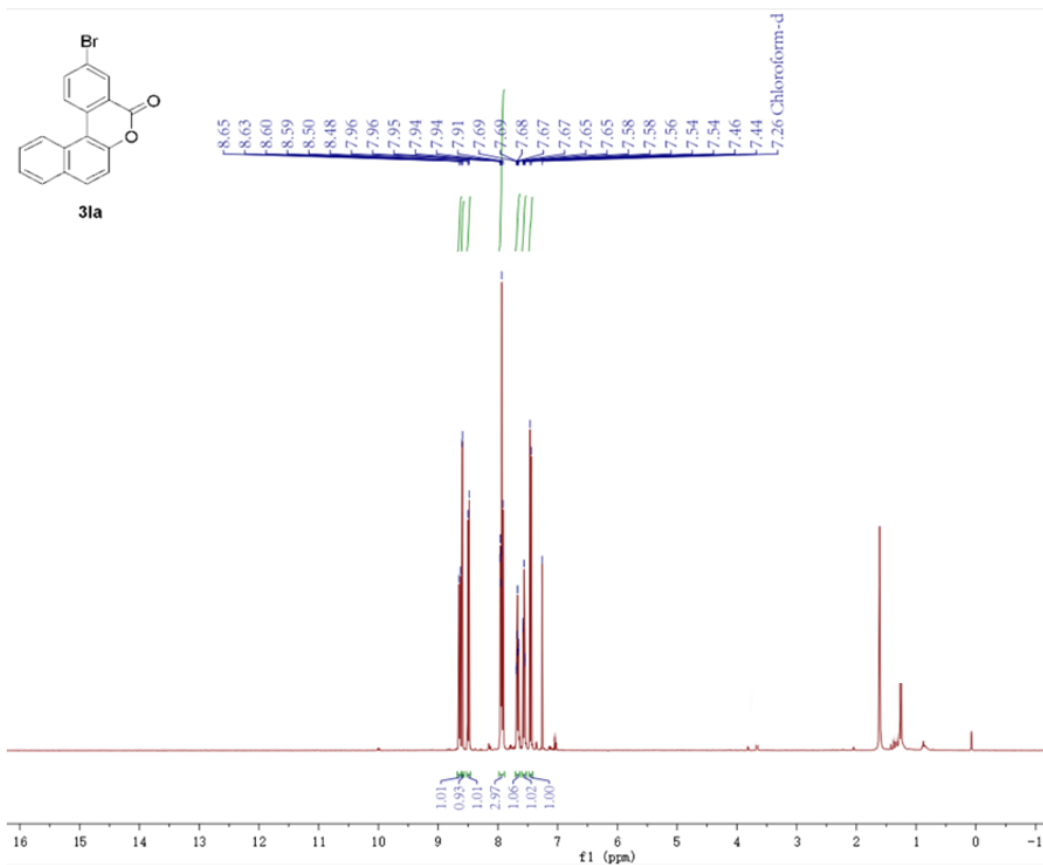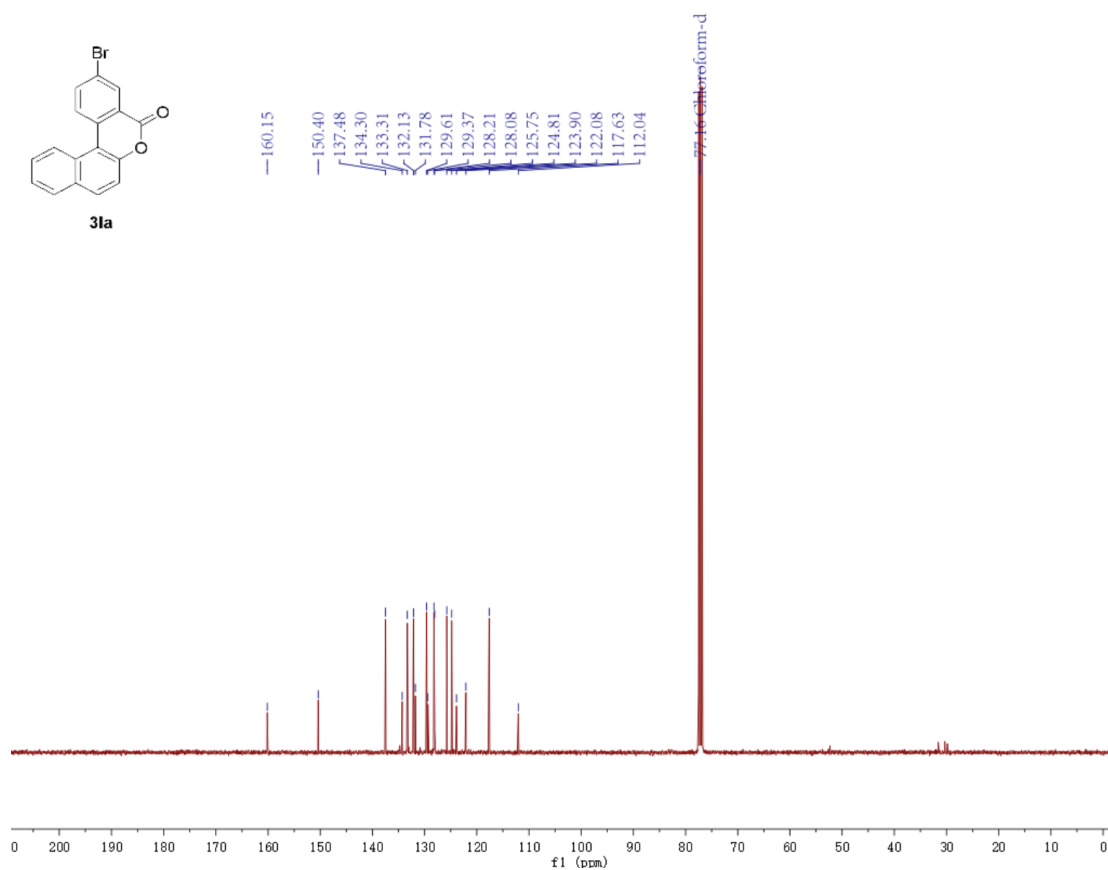

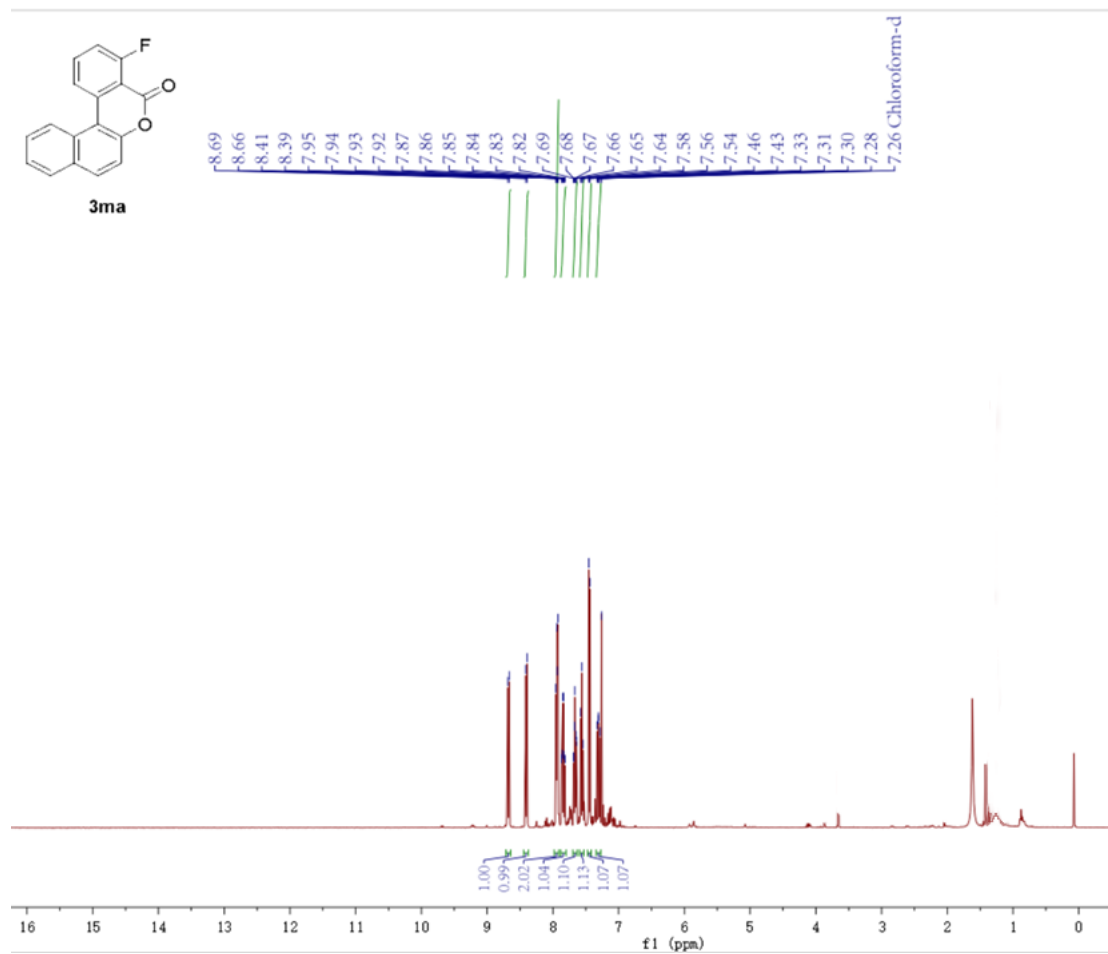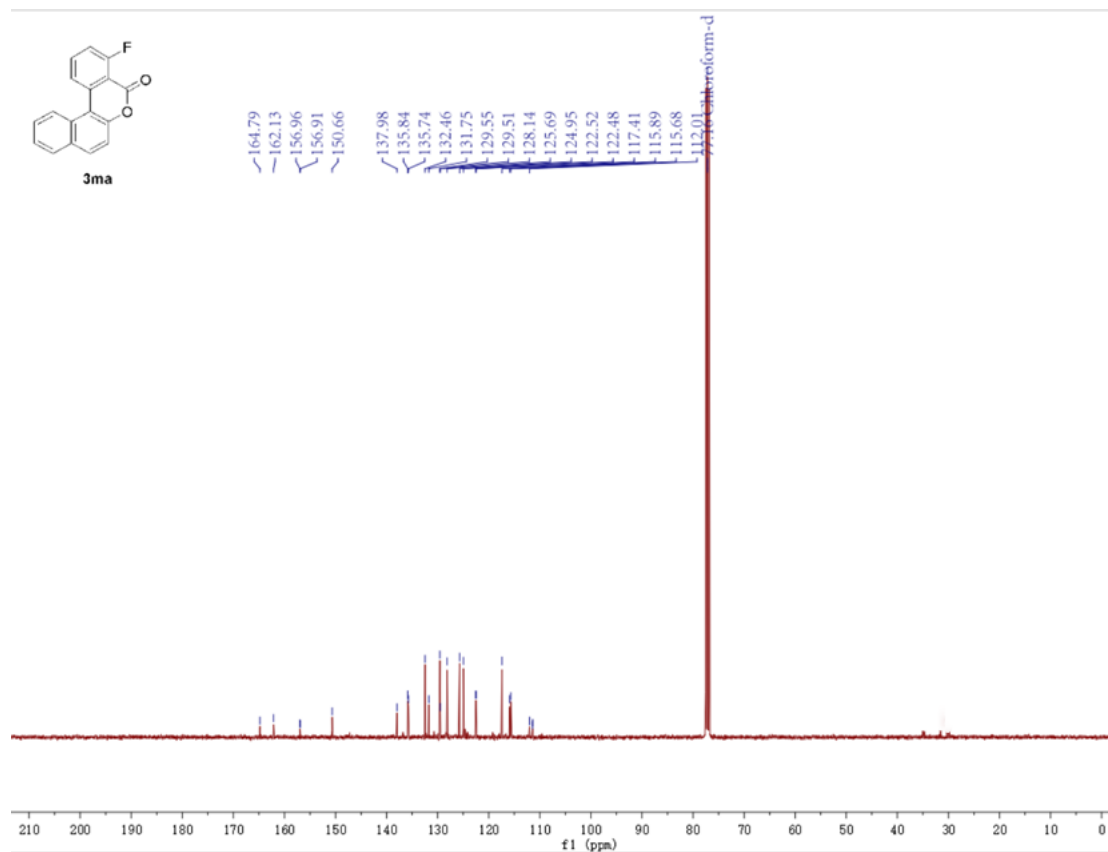

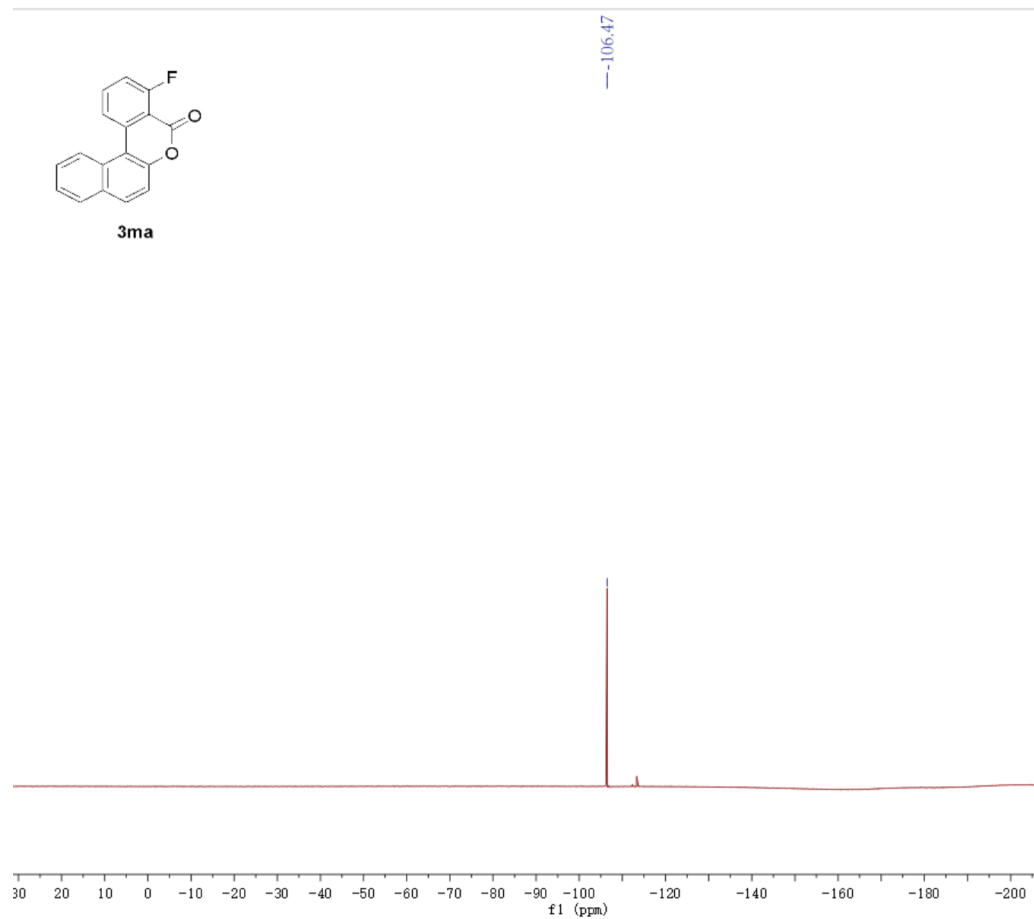

Supplement: Additional file 1 [file 1860-5397-20-76-S1.pdf]
